# Supplementary material
Source: PubMed Central journal article supplement (PMC4084840)
Supplement: pr500394z_si_001.pdf [file pr500394z_si_001.pdf]

# Supplementary Figures

# Supplementary Figures Legends

**Supplementary Figure 1:** Spectra of Detached, N- and O-linked Glycans from Serum and Recombinant Derived ITIH4

**Supplementary Figure 2:** Proteomic analyses and peptide identification of Serum and Recombinant ITIH4

**Supplementary Figure 3:** Extracted Ion Chromatogram (XIC) plots of ITIH4 glycopeptides treated with PNGaseF/H<sub>2</sub><sup>18</sup>O for site occupancy determination.

**Supplementary Figure 4:** Electron transfer dissociation (ETD) spectra of de-sialylated, mTRAQ-labeled glycopeptides IPKPEASFSPR+HexNAcHex and LAILPASAPPATSNPDPAVSR+HexNAc<sub>2</sub>Hex<sub>2</sub>.

**Supplementary Figure 5:** Table of all observed recombinant and serum-derived ITIH4 glycopeptides from CID MS/MS spectra, including (a) no exoglycosidase treatment, (b) after treatment with 2/3,6,8 neuraminidase, or (c) after treatment with 2/3,6,8 neuraminidase and alpha 1-3,4 fucosidase.

# Supplementary Figure 1

## Supplementary Figure 1 A

### MALDI-TOF (MS) Spectra of Permethylated N-Glycans

# N-linked Glycans from Recombinant ITIH4

4700 Reflector Spec #1[BP = 2606.2, 4246]

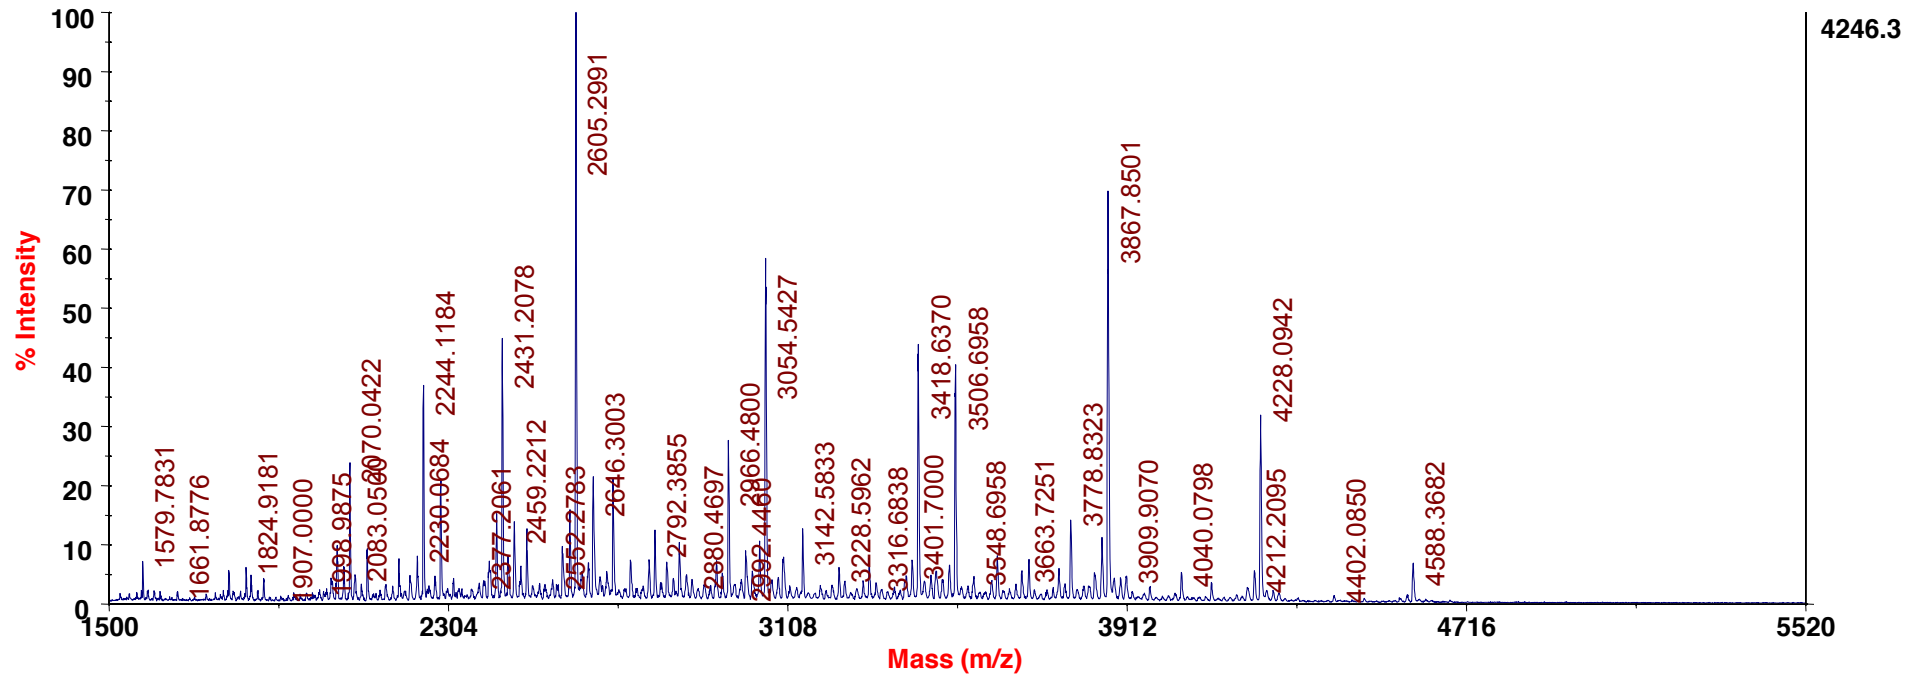

H:\GoldmanLab\KevinChandler\Data\KBC\_274\KBC\_274\_280\_MALDI\_Glycans\KBC\_280\_07262013  
D5\_1\_5500.T2D (HEK293 ITIH4 DETACHED, PERMETHYLATED N-GLYCANS)

# Recombinant ITIH4 N-Glycan Relative Intensity

| Peak (m/z) | Glycan    | Relative Intensity (%) | Fuc (Y/N) | Fuc Intensity | NeuAc (Y/N) | NeuAc Intensity | Full NeuAc (Y/N) | Full NeuAc Intensity | 2 Fuc (Y/N) | 2 Fuc Intensity |
|------------|-----------|------------------------|-----------|---------------|-------------|-----------------|------------------|----------------------|-------------|-----------------|
| 1661.84    | A2        | 0.1                    | 0         | 0.0           | 0           | 0.0             | 0                | 0.0                  | 0           | 0.0             |
| 2070.04    | A2G2      | 1.3                    | 0         | 0.0           | 0           | 0.0             | 0                | 0.0                  | 0           | 0.0             |
| 2244.13    | FA2G2     | 3.8                    | 1         | 3.8           | 0           | 0.0             | 0                | 0.0                  | 0           | 0.0             |
| 2285.15    | FA3G1     | 1.4                    | 1         | 1.4           | 0           | 0.0             | 0                | 0.0                  | 0           | 0.0             |
| 2418.21    | FA2F1G2   | 1.5                    | 1         | 1.5           | 0           | 0.0             | 0                | 0.0                  | 1           | 1.5             |
| 2431.21    | A2G2S1    | 5.3                    | 0         | 0.0           | 1           | 5.3             | 0                | 0.0                  | 0           | 0.0             |
| 2489.25    | FA3G2     | 1.4                    | 1         | 1.4           | 0           | 0.0             | 0                | 0.0                  | 0           | 0.0             |
| 2605.30    | FA2G2S1   | 15.2                   | 1         | 15.2          | 1           | 15.2            | 0                | 0.0                  | 0           | 0.0             |
| 2646.33    | FA3G1S1   | 2.5                    | 1         | 2.5           | 1           | 2.5             | 0                | 0.0                  | 0           | 0.0             |
| 2693.35    | FA3G3     | 3.3                    | 1         | 3.3           | 0           | 0.0             | 0                | 0.0                  | 0           | 0.0             |
| 2792.38    | A2G2S2    | 1.9                    | 0         | 0.0           | 1           | 1.9             | 1                | 1.9                  | 0           | 0.0             |
| 2850.43    | FA3G2S1   | 1.4                    | 1         | 1.4           | 1           | 1.4             | 0                | 0.0                  | 0           | 0.0             |
| 2966.47    | FA2G2S2   | 5.1                    | 1         | 5.1           | 1           | 5.1             | 1                | 5.1                  | 0           | 0.0             |
| 3054.53    | FA3G3S1   | 10.4                   | 1         | 10.4          | 1           | 10.4            | 0                | 0.0                  | 0           | 0.0             |
| 3142.58    | FA4G4     | 2.4                    | 1         | 2.4           | 0           | 0.0             | 0                | 0.0                  | 0           | 0.0             |
| 3228.61    | FA3F1G3S1 | 1.2                    | 1         | 1.2           | 1           | 1.2             | 0                | 0.0                  | 1           | 1.2             |
| 3415.70    | FA3G3S2   | 9.5                    | 1         | 9.5           | 1           | 9.5             | 0                | 0.0                  | 0           | 0.0             |
| 3503.75    | FA4G4S1   | 7.4                    | 1         | 7.4           | 1           | 7.4             | 0                | 0.0                  | 0           | 0.0             |
| 3602.78    | A3G3S3    | 2.0                    | 0         | 0.0           | 1           | 2.0             | 1                | 2.0                  | 0           | 0.0             |
| 3776.87    | FA3G3S3   | 2.8                    | 1         | 2.8           | 1           | 2.8             | 1                | 2.8                  | 0           | 0.0             |
| 3864.93    | FA4G4S2   | 13.6                   | 1         | 13.6          | 1           | 13.6            | 0                | 0.0                  | 0           | 0.0             |
| 4226.10    | FA4G4S3   | 5.5                    | 1         | 5.5           | 1           | 5.5             | 0                | 0.0                  | 0           | 0.0             |
| 4587.27    | FA4G4S4   | 0.8                    | 1         | 0.8           | 1           | 0.8             | 1                | 0.8                  | 0           | 0.0             |
|            |           | 100.0                  |           | 89.4          |             | 84.7            |                  | 12.7                 |             | 2.8             |

# Detached Serum ITIH4 N-glycans

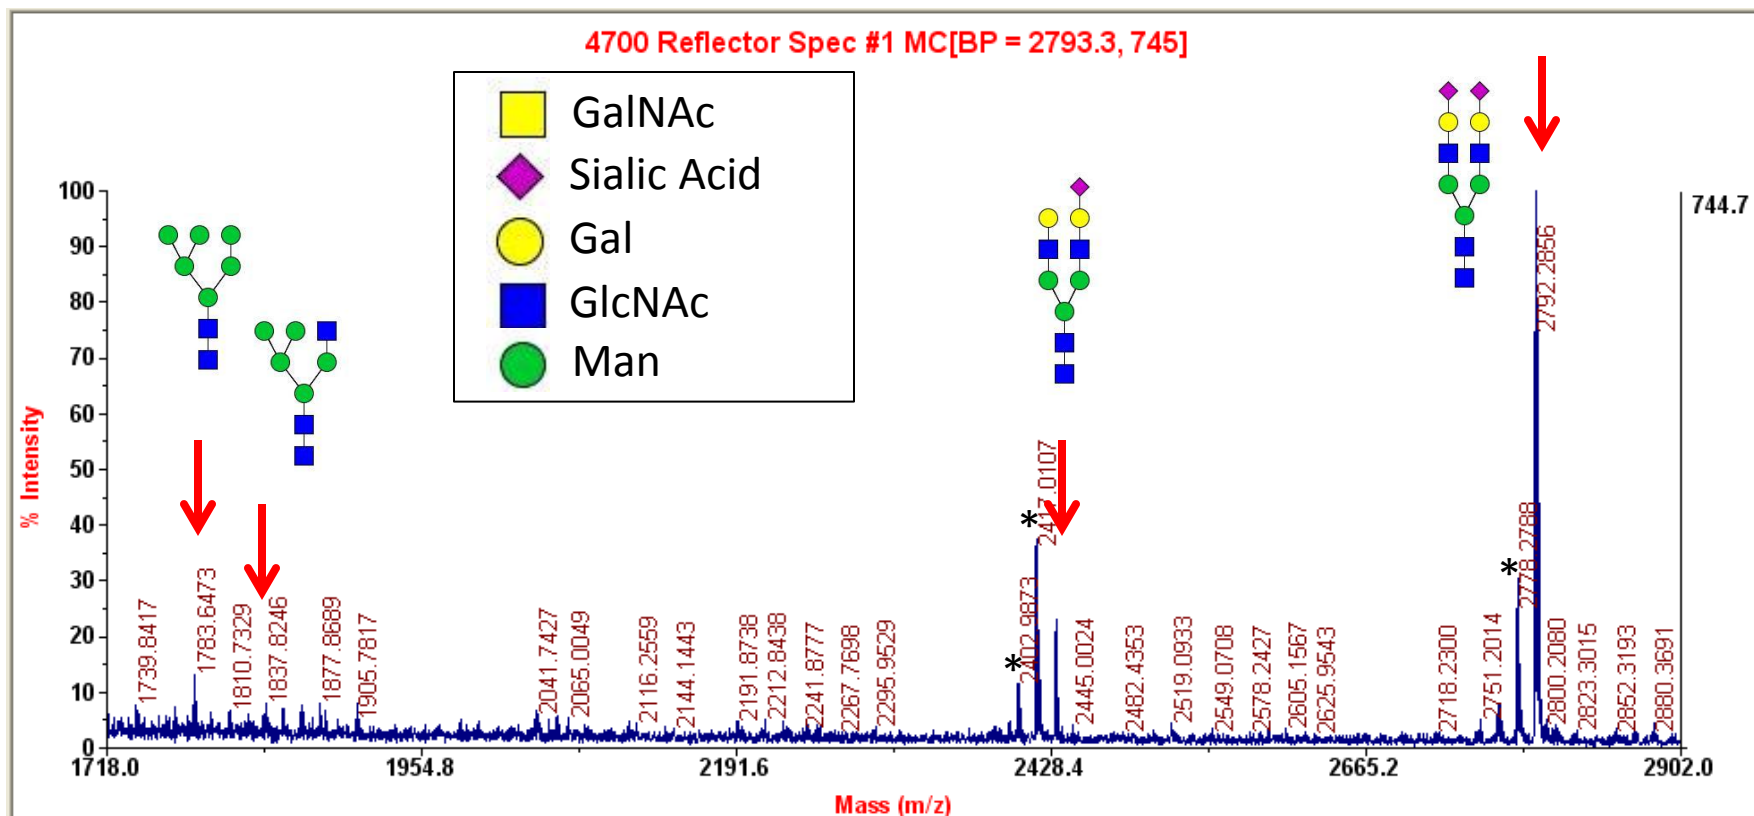

\*incomplete permethylation

Supplementary Figure 1 B

Permethylated O-linked Glycans from Recombinant ITIH4



# O-glycans - Full MS

KBC\_ITIH4\_cell\_O-glycan-FT-2 #1 RT: 0.01

T: FTMS + c NSI Full ms [200.00-2000.00]

Fragmentation data also available, not shown

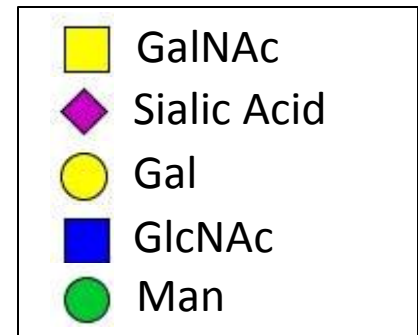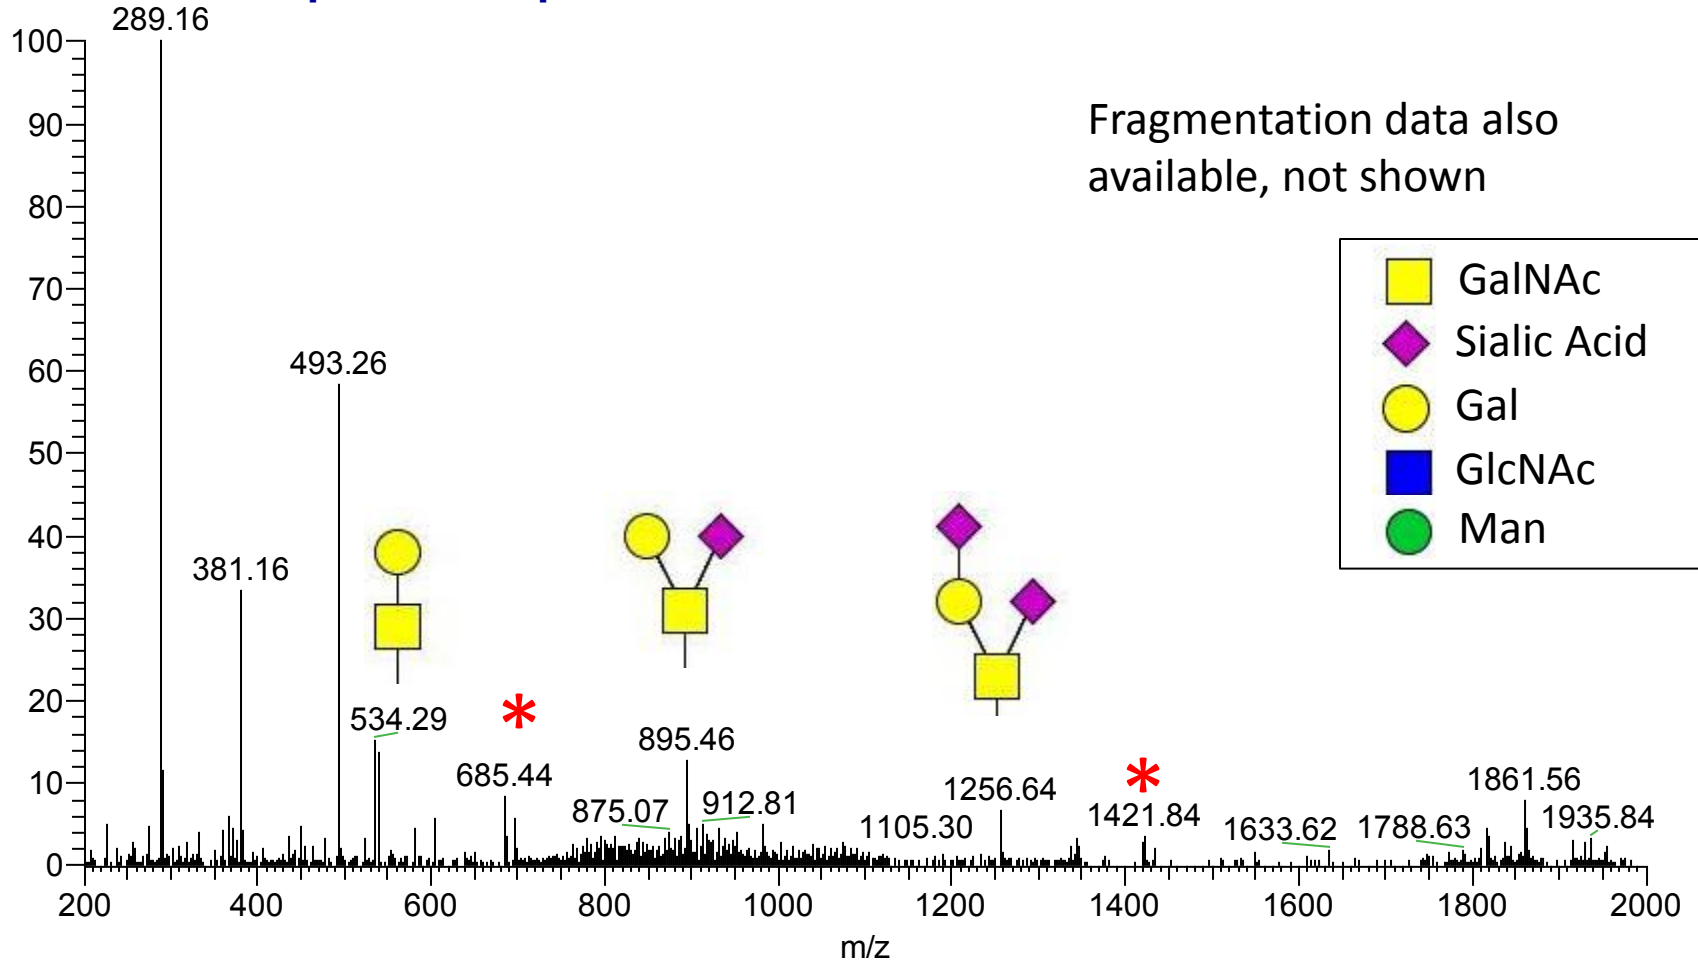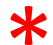

\* non-glycan masses / contaminants

Supplementary Figure 1 C

Permethylated O-linked Glycans from Serum ITIH4

| Structure                          |                  | Permethylated (Na) |           |          |          |
|------------------------------------|------------------|--------------------|-----------|----------|----------|
|                                    |                  | z=1                | z=2       | z=3      | z=4      |
| <b>(Hex)1(HexNAc)1-OMe</b>         | Major structures | 534.2591           | 278.6391  | 193.4227 | 150.8145 |
| <b>(NeuAc)1(Hex)1(HexNAc)1-OMe</b> |                  | 895.4722           | 459.2259  | 313.8139 | 241.1079 |
| <b>(NeuAc)2(Hex)1(HexNAc)1-OMe</b> |                  | 1256.9248          | 639.8128  | 434.2051 | 331.4013 |
| <b>(NeuAc)2(Hex)2(HexNAc)2-OMe</b> | Minor structures | 1705.8619          | 864.4258  | 583.9471 | 443.7078 |
| <b>(NeuAc)2(Hex)3(HexNAc)3-OMe</b> |                  | 2155.0880          | 1089.0389 | 733.6892 | 556.0143 |

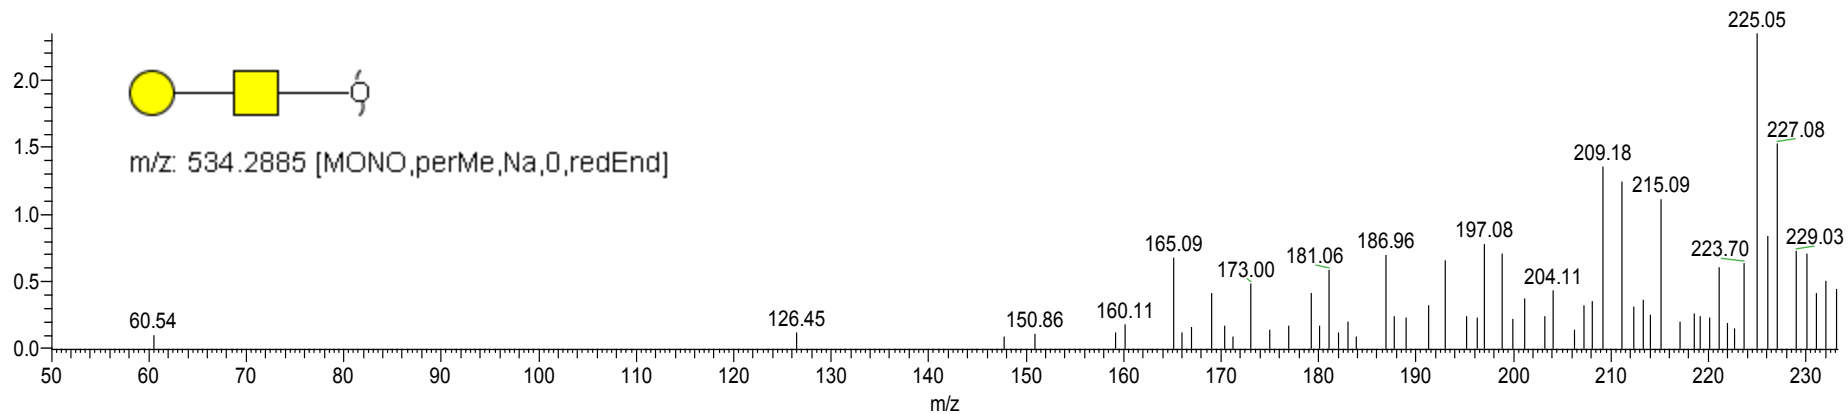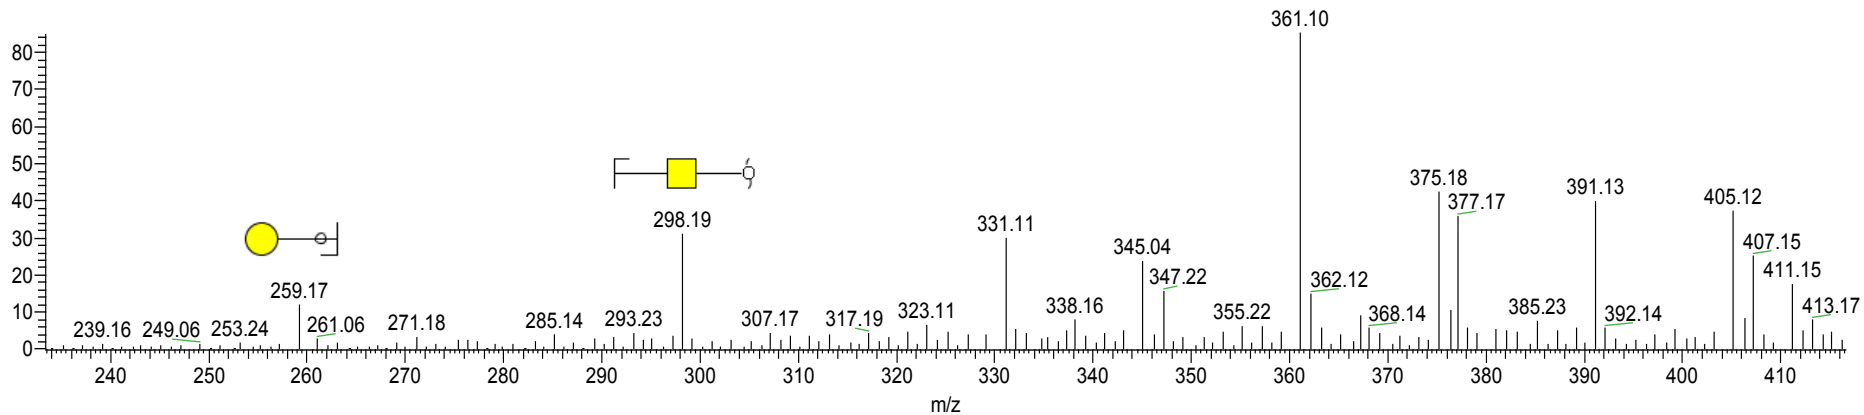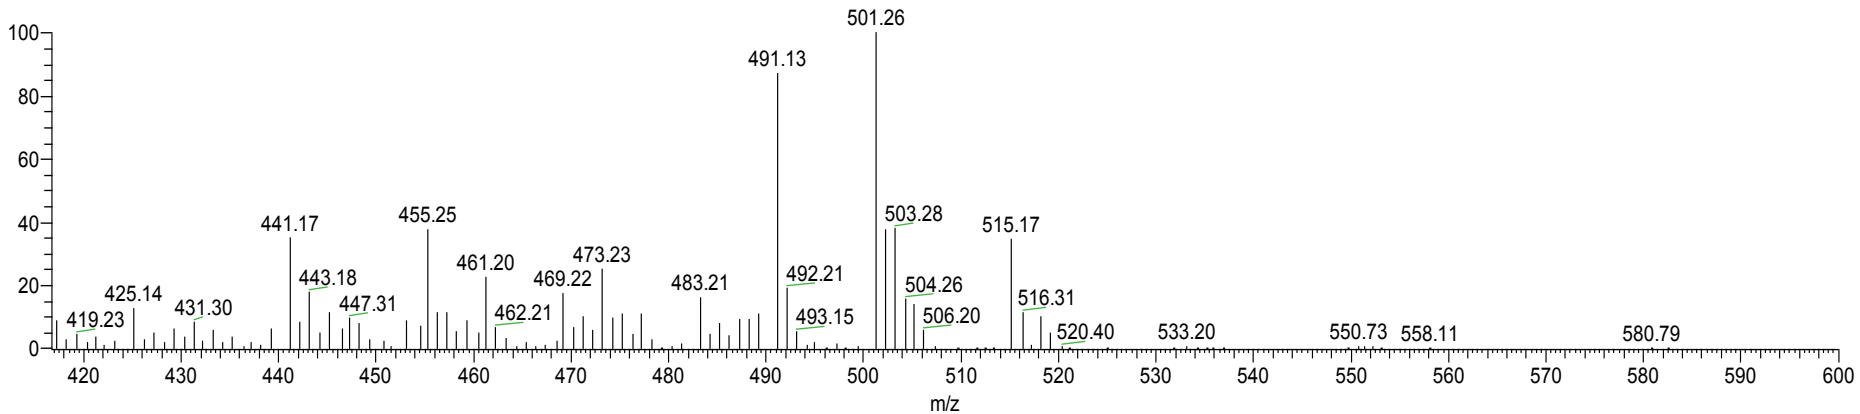

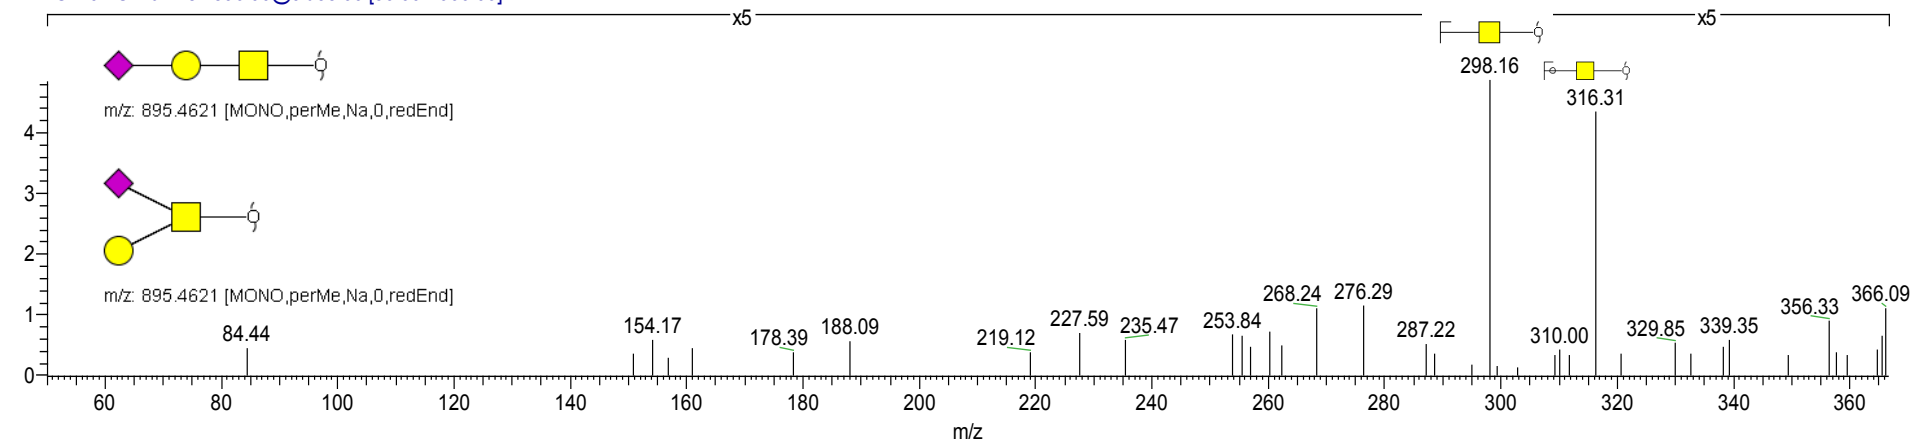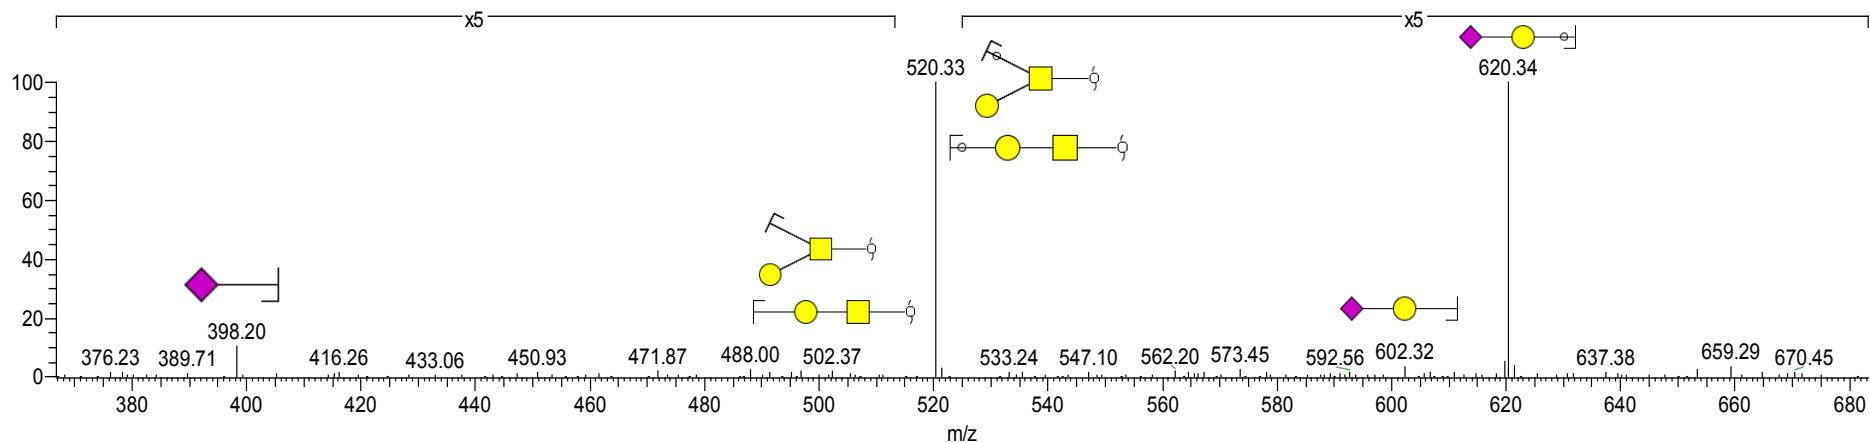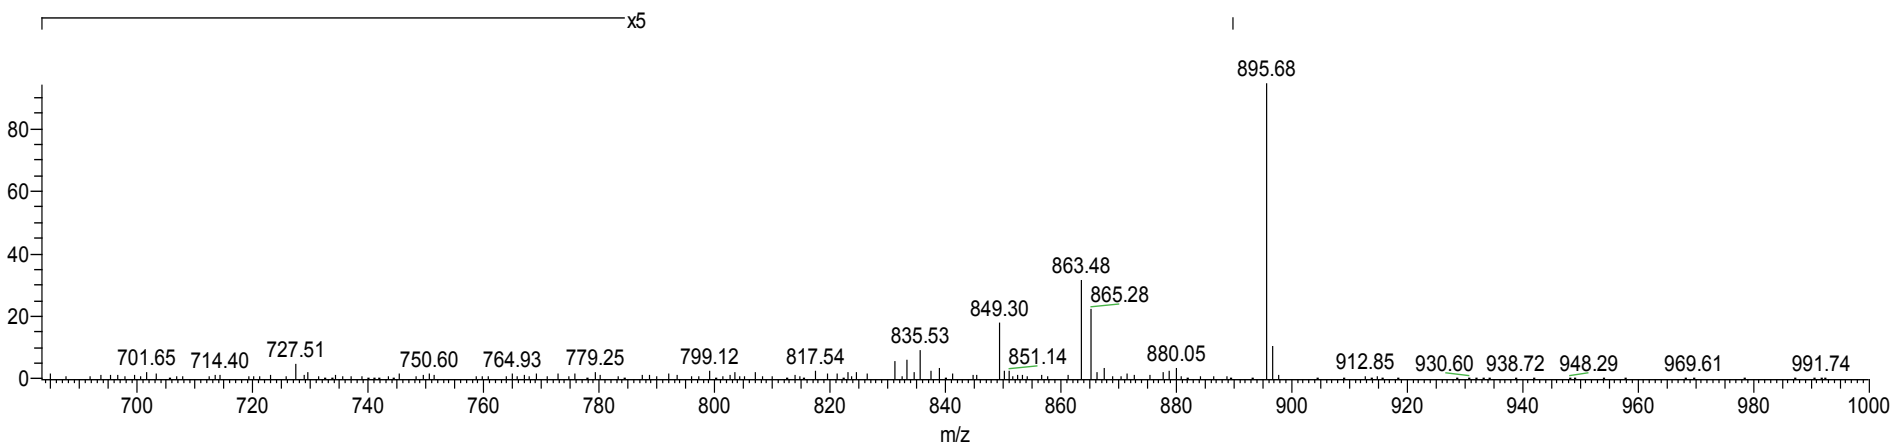

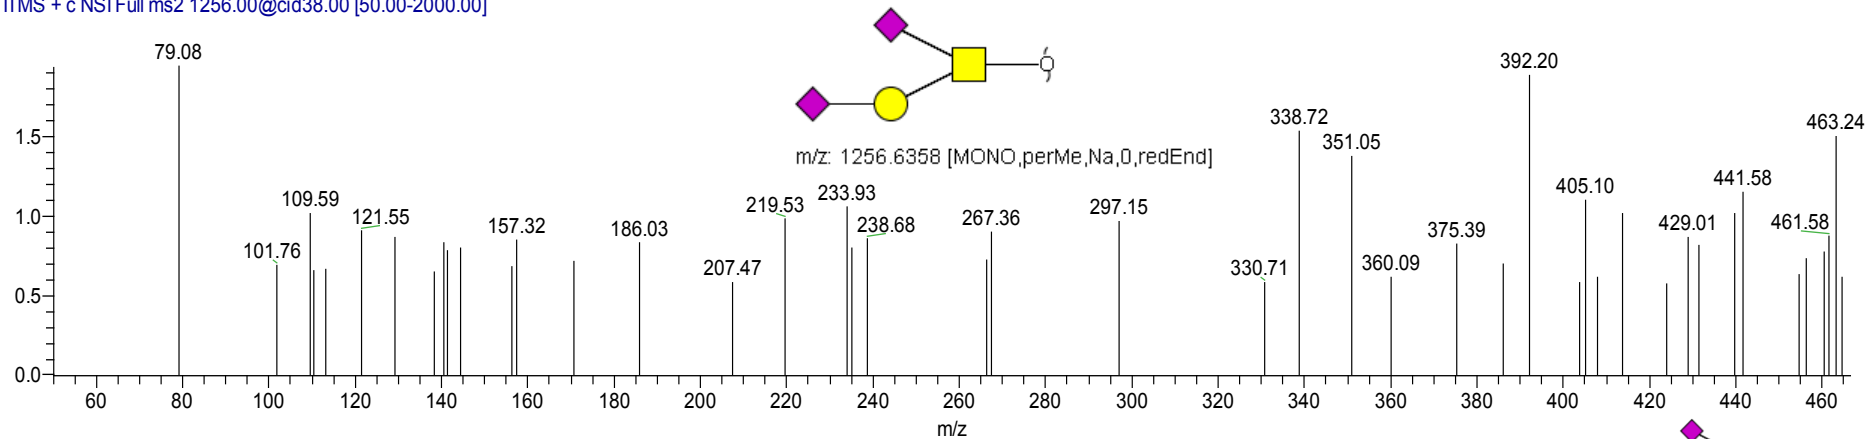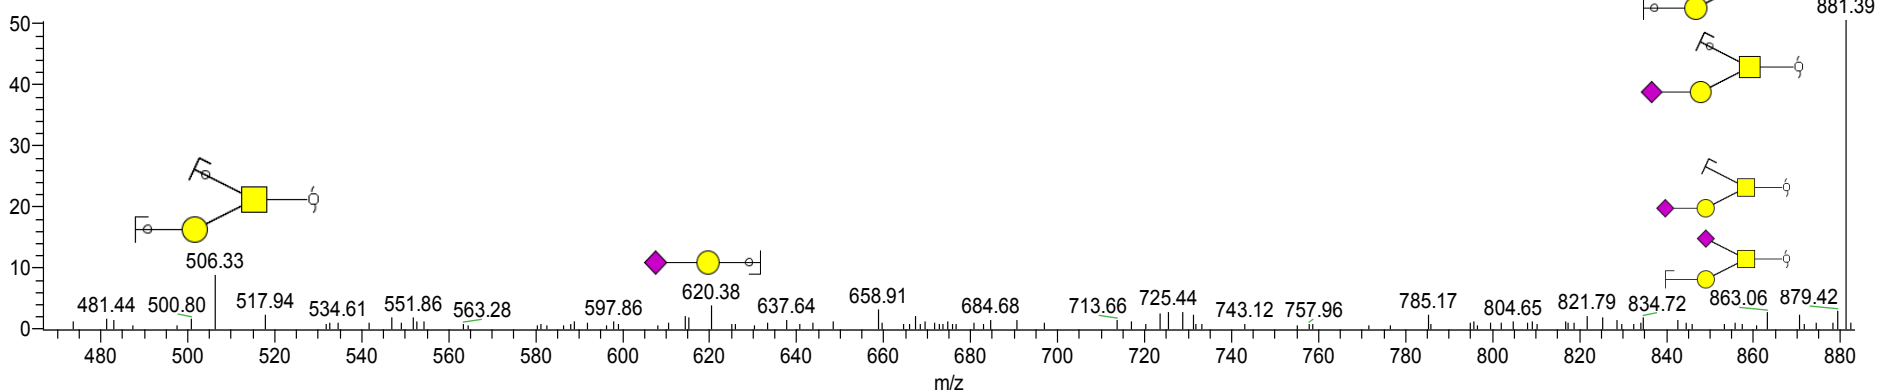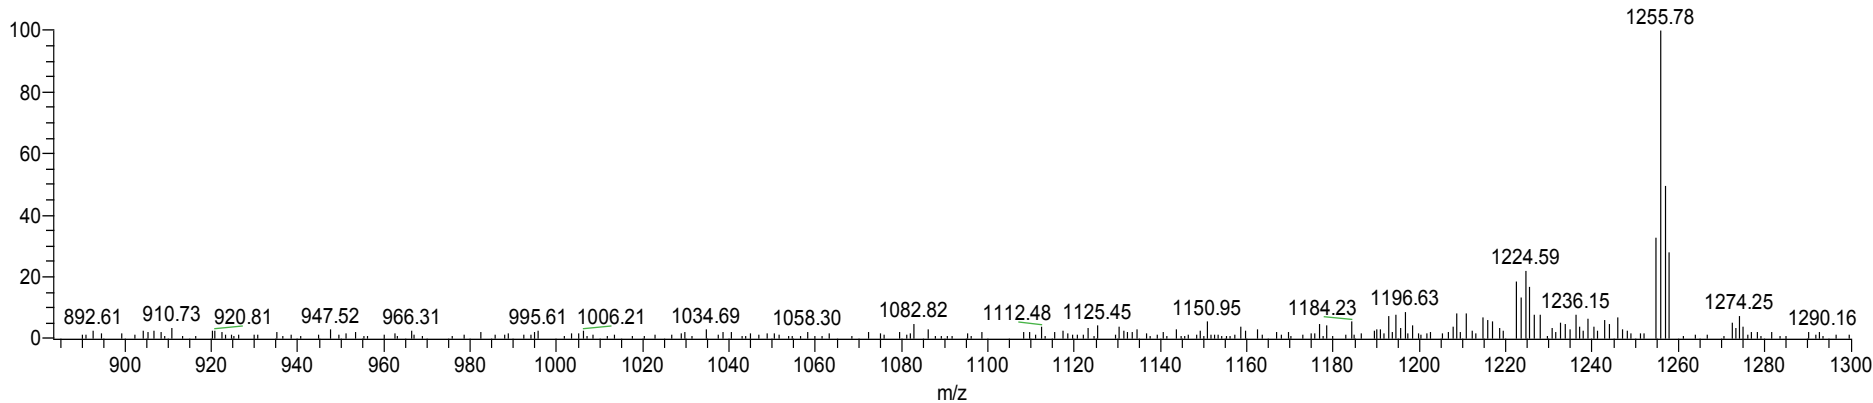

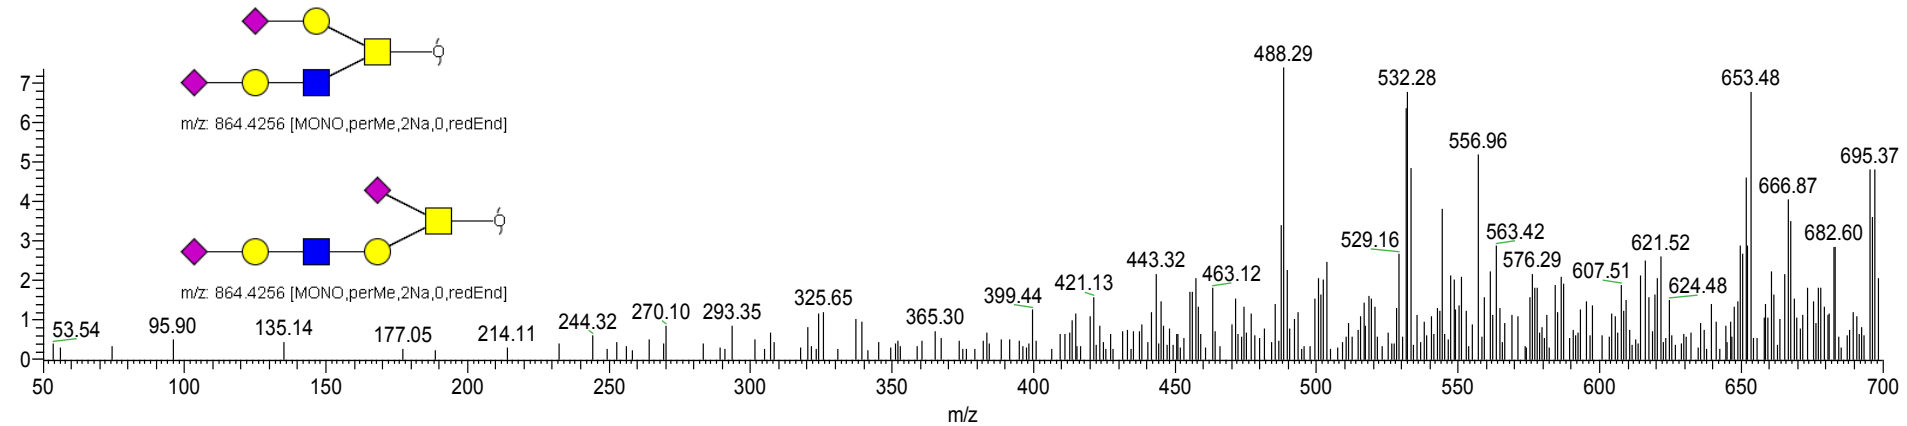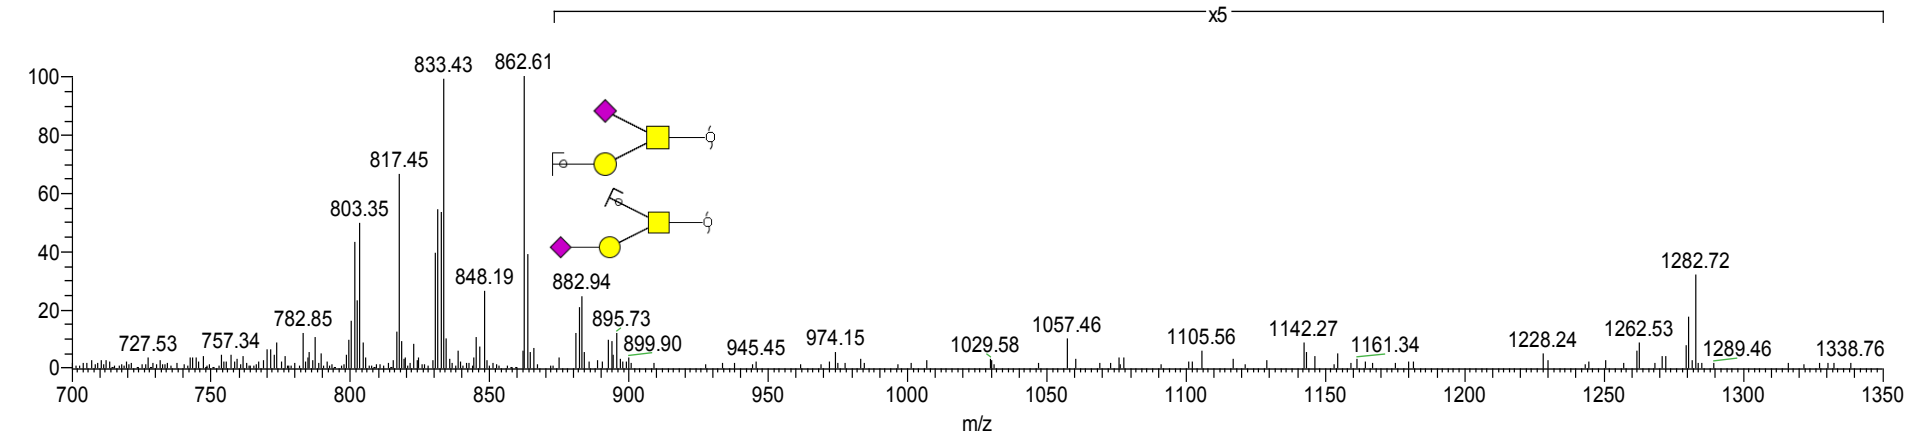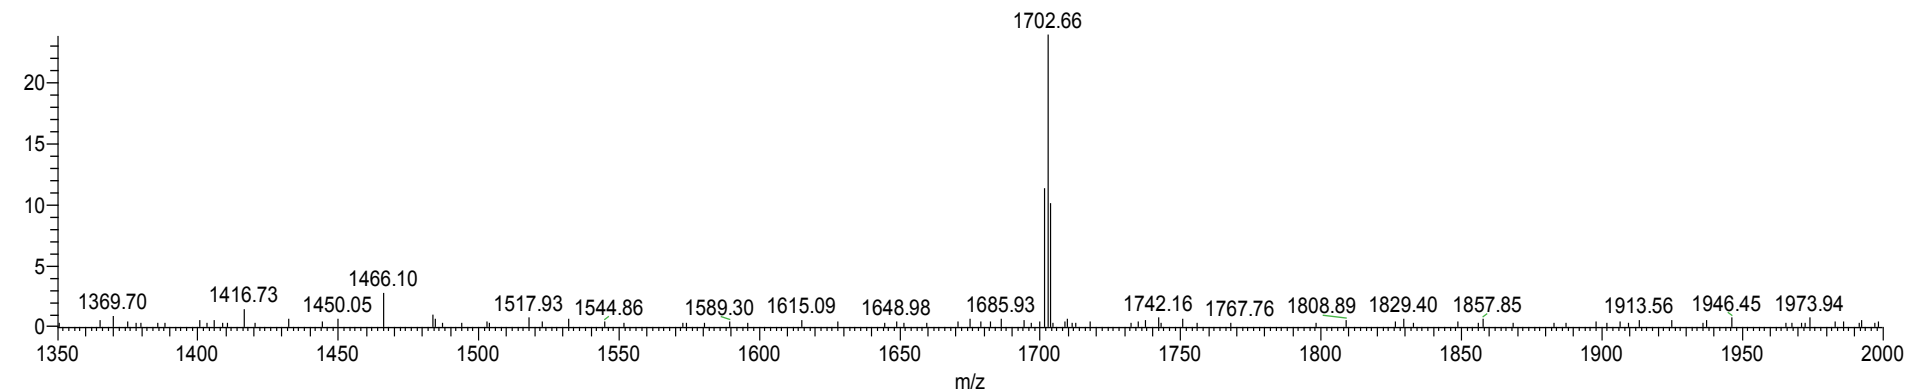

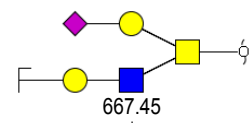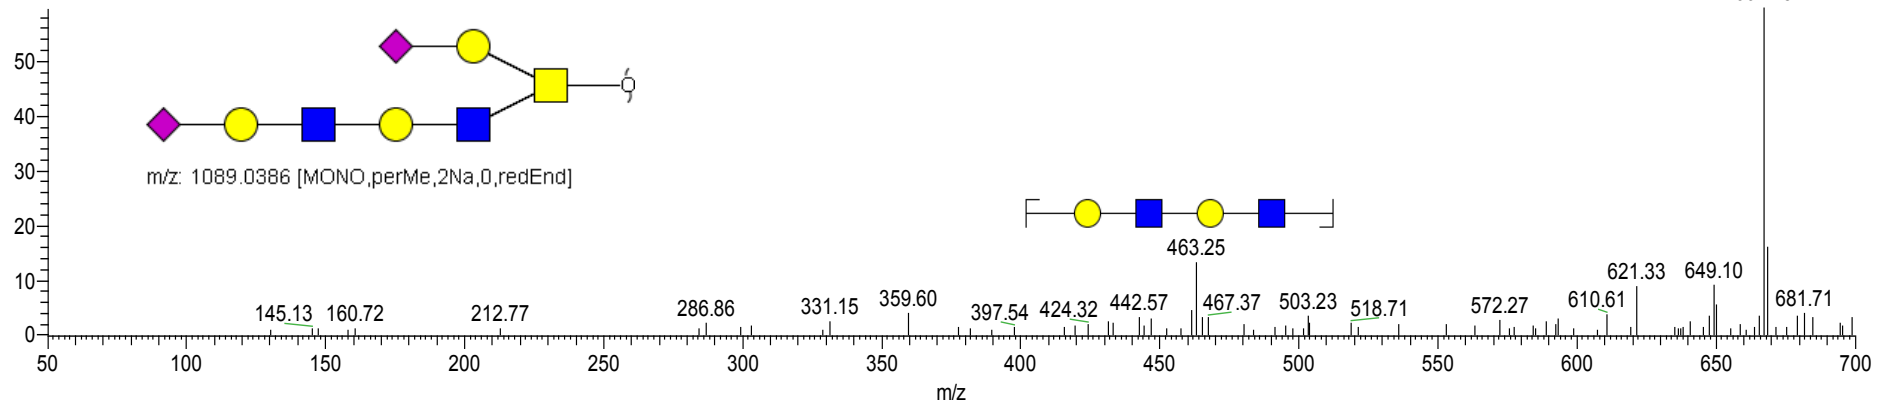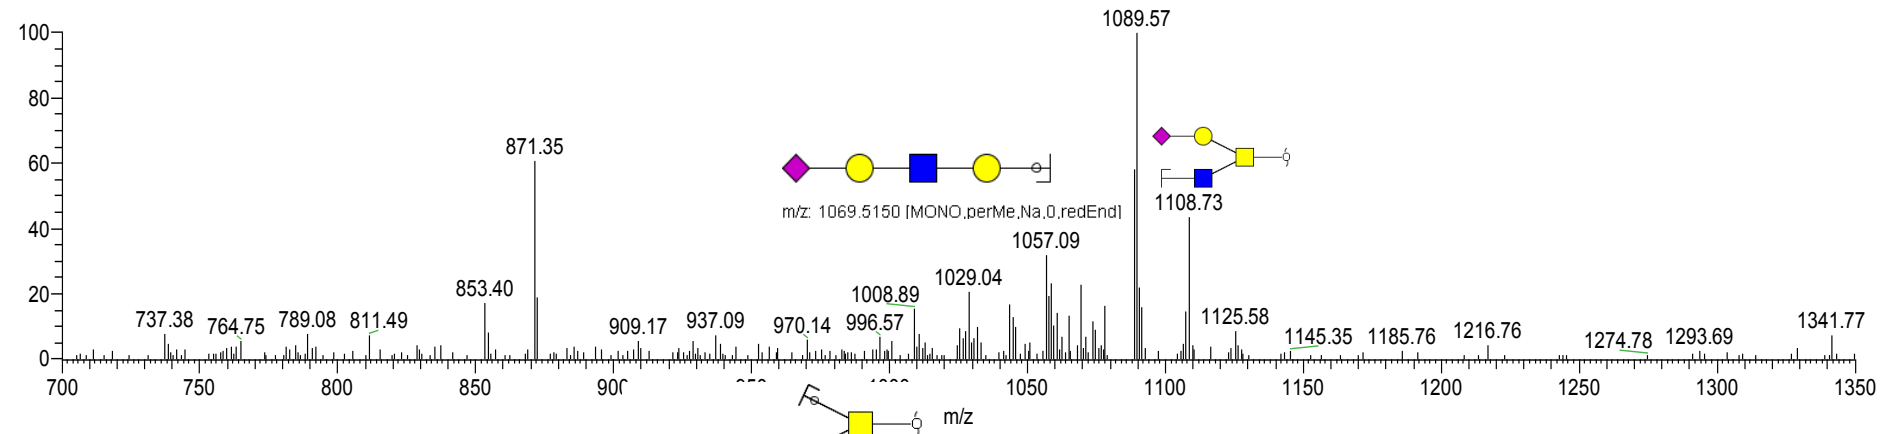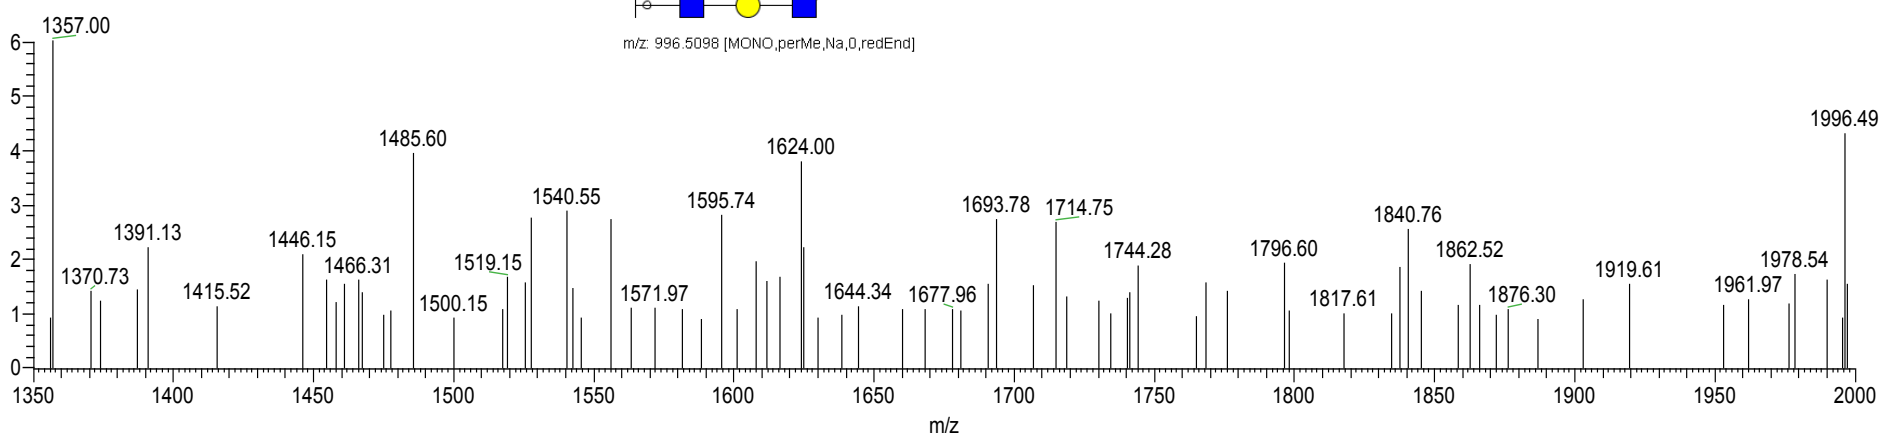



# Supplementary Figure 2

**Figure 2A: Recombinant ITIH4 Protein Identification (Trypsin Digest, MS/MS)**

| <b>N</b> | <b>%Cov(95)</b> | <b>Accession</b>      | <b>Species</b> | <b>Peptides(95%)</b> |
|----------|-----------------|-----------------------|----------------|----------------------|
| 1        | 52.9            | sp Q14624 ITIH4_HUMAN | HUMAN          | 166                  |
| 2        | 22.51           | sp P08238 HS90B_HUMAN | HUMAN          | 19                   |
| 3        | 29.64           | sp P08107 HSP71_HUMAN | HUMAN          | 21                   |
| 4        | 33.07           | sp P63261 ACTG_HUMAN  | HUMAN          | 14                   |
| 4        | 29.33           | sp P60709 ACTB_HUMAN  | HUMAN          | 13                   |
| 5        | 12.12           | sp P13639 EF2_HUMAN   | HUMAN          | 11                   |
| 6        | 22.46           | sp P07195 LDHB_HUMAN  | HUMAN          | 9                    |
| 7        | 12.95           | sp P14625 ENPL_HUMAN  | HUMAN          | 12                   |
| 8        | 17.74           | sp P11021 GRP78_HUMAN | HUMAN          | 12                   |
| 9        | 15.63           | sp P14618 KPYM_HUMAN  | HUMAN          | 8                    |
| 10       | 22.17           | sp Q71U36 TBA1A_HUMAN | HUMAN          | 9                    |
| 10       | 22.17           | sp P68363 TBA1B_HUMAN | HUMAN          | 9                    |
| 11       | 9.276           | sp O94985 CSTN1_HUMAN | HUMAN          | 8                    |
| 12       | 13.33           | sp Q08380 LG3BP_HUMAN | HUMAN          | 9                    |
| 13       | 4.885           | sp P01023 A2MG_HUMAN  | HUMAN          | 9                    |
| 14       | 15.21           | sp P06733 ENOA_HUMAN  | HUMAN          | 6                    |
| 15       | 2.589           | sp P49327 FAS_HUMAN   | HUMAN          | 6                    |
| 16       | 19.51           | sp P04075 ALDOA_HUMAN | HUMAN          | 6                    |
| 17       | 13.29           | sp P07437 TBB5_HUMAN  | HUMAN          | 6                    |
| 18       | 4.972           | sp P14543 NID1_HUMAN  | HUMAN          | 5                    |
| 19       | 9.852           | sp P02768 ALBU_HUMAN  | HUMAN          | 7                    |
| 20       | 16.72           | sp P04406 G3P_HUMAN   | HUMAN          | 4                    |
| 21       | 10.71           | sp P16870 CBPE_HUMAN  | HUMAN          | 5                    |
| 22       | 17.49           | sp P07900 HS90A_HUMAN | HUMAN          | 14                   |
| 23       | 17.18           | sp P11142 HSP7C_HUMAN | HUMAN          | 11                   |
| 24       | 15.29           | sp P62258 1433E_HUMAN | HUMAN          | 4                    |
| 25       | 24.6            | sp Q99880 H2B1L_HUMAN | HUMAN          | 4                    |
| 25       | 24.6            | sp Q8N257 H2B3B_HUMAN | HUMAN          | 4                    |
| 25       | 24.6            | sp Q16778 H2B2E_HUMAN | HUMAN          | 4                    |
| 25       | 24.6            | sp P33778 H2B1B_HUMAN | HUMAN          | 4                    |
| 25       | 24.6            | sp P23527 H2B1O_HUMAN | HUMAN          | 4                    |
| 25       | 24.6            | sp P06899 H2B1J_HUMAN | HUMAN          | 4                    |
| 25       | 24.6            | sp Q99879 H2B1M_HUMAN | HUMAN          | 4                    |
| 25       | 24.6            | sp Q99877 H2B1N_HUMAN | HUMAN          | 4                    |
| 25       | 24.6            | sp Q93079 H2B1H_HUMAN | HUMAN          | 4                    |
| 25       | 24.6            | sp Q5QNW6 H2B2F_HUMAN | HUMAN          | 4                    |
| 25       | 24.6            | sp P62807 H2B1C_HUMAN | HUMAN          | 4                    |
| 25       | 24.6            | sp P58876 H2B1D_HUMAN | HUMAN          | 4                    |
| 25       | 24.6            | sp P57053 H2BFS_HUMAN | HUMAN          | 4                    |
| 25       | 24.6            | sp O60814 H2B1K_HUMAN | HUMAN          | 4                    |
| 26       | 9.779           | sp Q8NHW5 RLAOL_HUMAN | HUMAN          | 3                    |
| 26       | 9.779           | sp P05388 RLA0_HUMAN  | HUMAN          | 3                    |
| 27       | 9.354           | sp P10909 CLUS_HUMAN  | HUMAN          | 3                    |
| 28       | 21.36           | sp P62805 H4_HUMAN    | HUMAN          | 3                    |
| 29       | 4.027           | sp Q12906 ILF3_HUMAN  | HUMAN          | 3                    |

|    |        |                       |       |   |
|----|--------|-----------------------|-------|---|
| 30 | 0.9423 | sp P13611 CSPG2_HUMAN | HUMAN | 3 |
| 31 | 17.47  | sp P00338 LDHA_HUMAN  | HUMAN | 6 |
| 32 | 4.048  | sp P34932 HSP74_HUMAN | HUMAN | 3 |
| 33 | 5.774  | sp P12277 KCRB_HUMAN  | HUMAN | 2 |
| 34 | 28.19  | sp P62158 CALM_HUMAN  | HUMAN | 3 |
| 35 | 2.93   | sp P22314 UBA1_HUMAN  | HUMAN | 3 |

**Figure 2B: Serum ITIH4 Protein Identification (Trypsin Digest, MS/MS)**

| <b>N</b> | <b>%Cov(95)</b> | <b>Accession</b>      | <b>Species</b> | <b>Peptides(95%)</b> |
|----------|-----------------|-----------------------|----------------|----------------------|
| 1        | 59.0            | sp Q14624 ITIH4_HUMAN | HUMAN          | 56                   |
| 2        | 27.9            | sp P19823 ITIH2_HUMAN | HUMAN          | 20                   |
| 3        | 12.6            | sp P01024 CO3_HUMAN   | HUMAN          | 14                   |
| 4        | 18.1            | sp P02768 ALBU_HUMAN  | HUMAN          | 11                   |
| 5        | 6.4             | sp P0C0L5 CO4B_HUMAN  | HUMAN          | 7                    |
| 5        | 6.4             | sp P0C0L4 CO4A_HUMAN  | HUMAN          | 7                    |
| 6        | 8.6             | sp P19827 ITIH1_HUMAN | HUMAN          | 6                    |
| 7        | 7.1             | sp P04264 K2C1_HUMAN  | HUMAN          | 4                    |
| 8        | 20.6            | sp P01857 IGHG1_HUMAN | HUMAN          | 5                    |
| 9        | 9.6             | sp P01876 IGHA1_HUMAN | HUMAN          | 3                    |

# Supplementary Figure 3

ITIH4 Occupancy Summary  
Serum and Cell ITIH4

# Part I:

## N-glycosylation Site Occupancy in Serum-Derived ITIH4

- Serum-derived ITIH4 was treated with GluC and Trypsin, heated to denature proteases, then treated with PNGaseF in the presence of H<sub>2</sub><sup>18</sup>O
- 0.1 ug of the digest was injected onto an Eksigent ChromXP C18-CL interfaced with a 5600 TripleTOF mass spectrometer (ABSCIEX)
- Different chromatographic gradients were used (short gradient, 30 min; long gradient, 120 min)

## Serum ITIH4 Occupancy Summary

| <b>Site</b> | <b>Peptide(s)</b>                 | <b><i>m/z</i> (charge)<br/>Unlabeled</b> | <b><i>m/z</i> (charge)<br/>Labeled</b> | <b>Serum<br/>ITIH4</b> |
|-------------|-----------------------------------|------------------------------------------|----------------------------------------|------------------------|
| <b>N81</b>  | KAFIT <u>N</u> F (T,G)            | 420.734 (2+)                             | 422.240 (2+)                           | +                      |
| <b>N207</b> | STFMTNQLVDALTTWQ <u>N</u> K (T,G) | 700.014 (3+)                             | 701.018 (3+)                           | >90%                   |
| <b>N274</b> | <u>N</u> VVFVIDK (T,G)            | 467.274 (2+)                             | 468.780 (2+)                           | <1%                    |
| <b>N517</b> | LPTQ <u>N</u> ITFQTE (T,G)        | 646.330 (2+)                             | 647.836 (2+)                           | >98%                   |
| <b>N577</b> | NQALNLSLAYSFVTPLTMVVTKPDDQE (T,G) | 1027.853 (3+)                            | 1028.857 (3+)                          | >95%                   |

Serum ITIH4, N81



**Site: N81 (Peptide: KAFITNF), Experiment: SerumITI4\_PNGaseF\_O18\_1uL.wiff**

Unlabeled (**420.73, 2+**) not detected, labeled (**422.24, 2+**) detected

Retention Time: 16.5 min (short gradient, 30 min)

- XIC of +TOF MS: Exp 1, 420.7 to 420.76 Da from Sample 1 (SerumITI4\_PNGaseF\_O18\_1uL) of SerumITI4\_PNGaseF\_O18\_1uL.wiff (Nanospray)
- XIC of +TOF MS: Exp 1, 422.21 to 422.27 Da from Sample 1 (SerumITI4\_PNGaseF\_O18\_1uL) of SerumITI4\_PNGaseF\_O18\_1uL.wiff (Nanospray)

XIC of +TOF MS: Exp 1, 420.7 to 420.76 Da from Sample 1 (SerumITI4\_PNGaseF\_O18\_1uL) of SerumITI4\_PNGaseF\_O18\_1uL.wiff... Max. 4.3e4 cps.

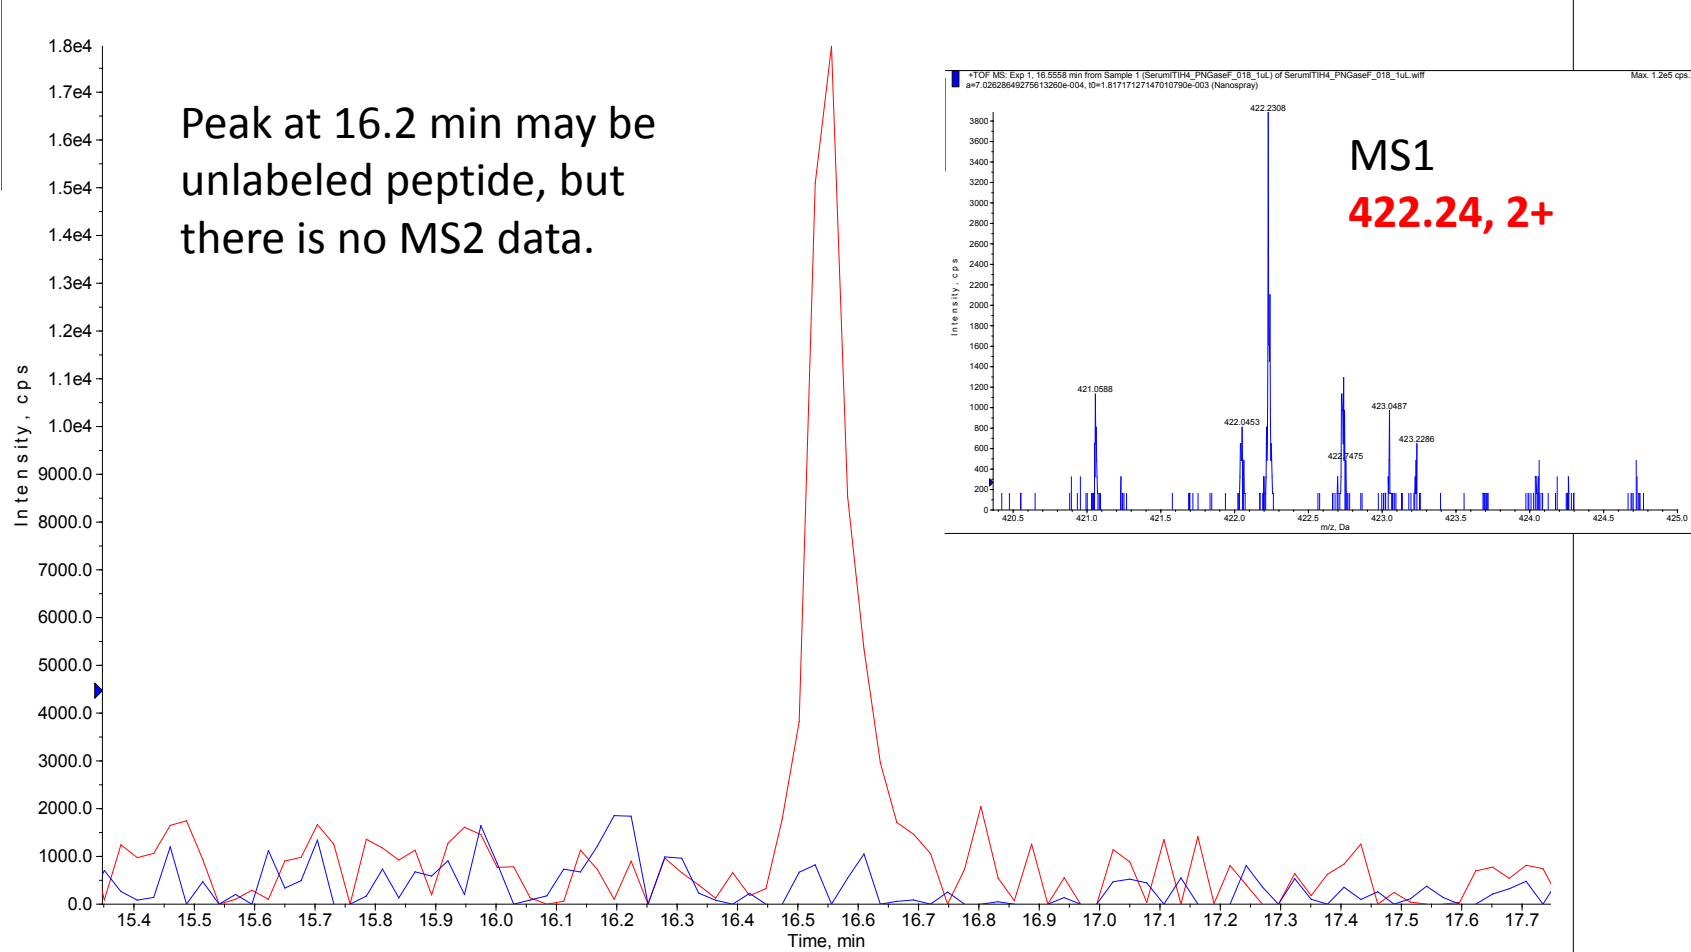

Peak at 16.2 min may be unlabeled peptide, but there is no MS2 data.

**Note:** In MS1, see 388 cps, or approx 7% of unlabeled peptide signal. Unlabeled ion may be at Retention Time 16.1957 min,  $m/z$  420.73, 2+, but difficult to be confident because the isotope cluster is near the baseline

# Serum ITIH4, N81

(N>D/O18)

KAFITNF.S

Labeled peptide observed, but low intensity. Unlabeled peptide (precursor and MS/MS) can not be found.

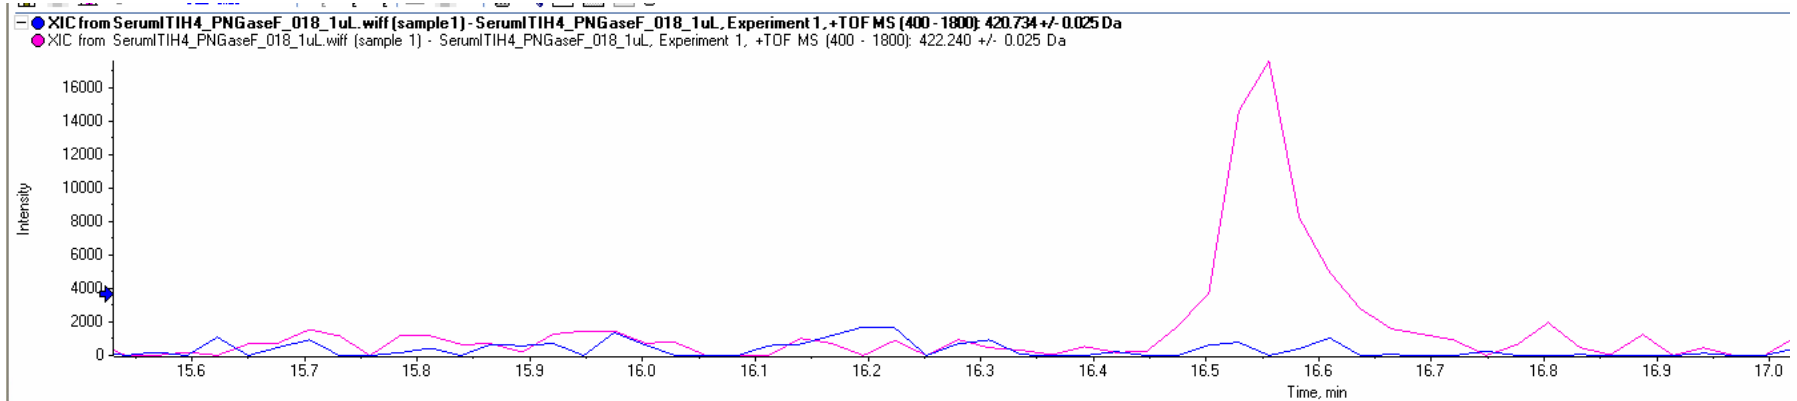

Fragmentation Evidence (peptide b- and y-ions) for N>D/O18 (3 Da shift) at glycosylation site

| Residue | b        | b+2      | y        | y+2      |
|---------|----------|----------|----------|----------|
| K       | 129.1022 | 65.0548  | 843.4735 | 422.2404 |
| A       | 200.1394 | 100.5733 | 715.3785 | 358.1929 |
| F       | 347.2078 | 174.1075 | 644.3414 | 322.6743 |
| I       | 460.2918 | 230.6496 | 497.2730 | 249.1401 |
| T       | 561.3395 | 281.1734 | 384.1889 | 192.5981 |
| N[DelW] | 678.3945 | 339.7009 | 283.1413 | 142.0743 |
| F       | 825.4629 | 413.2351 | 166.0863 | 83.5468  |

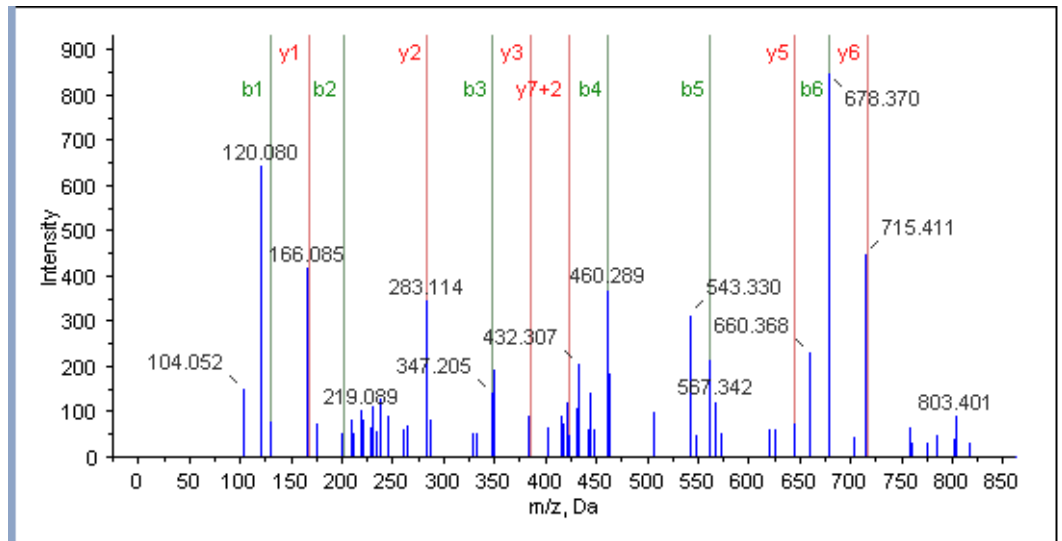

O18 labeled KAFITNFSMII also found, (NOT SHOWN), VERY low abundance

Serum ITIH4, N207

Site: **N207 (Peptide: STFMTNQLVDALTTWQNK)** File: SerumITI4\_PNGaseF\_018\_1uL.wiff

Unlabeled (**700.01, 3+**) not detected, labeled (**701.02, 3+**) detected

Retention Time: 19.5 min (short gradient, 30 min)

■ XIC of +TOF MS: Exp 1, 699.98 to 700.04 Da from Sample 1 (SerumITI4\_PNGaseF\_018\_1uL) of SerumITI4\_PNGaseF\_018\_1uL.wiff (Nanospray)

■ XIC of +TOF MS: Exp 1, 700.99 to 701.05 Da from Sample 1 (SerumITI4\_PNGaseF\_018\_1uL) of SerumITI4\_PNGaseF\_018\_1uL.wiff (Nanospray)

■ XIC of +TOF MS: Exp 1, 699.98 to 700.04 Da from Sample 1 (SerumITI4\_PNGaseF\_018\_1uL) of SerumITI4\_PNGaseF\_018\_1uL.wiff... Max. 7985.9 cps.

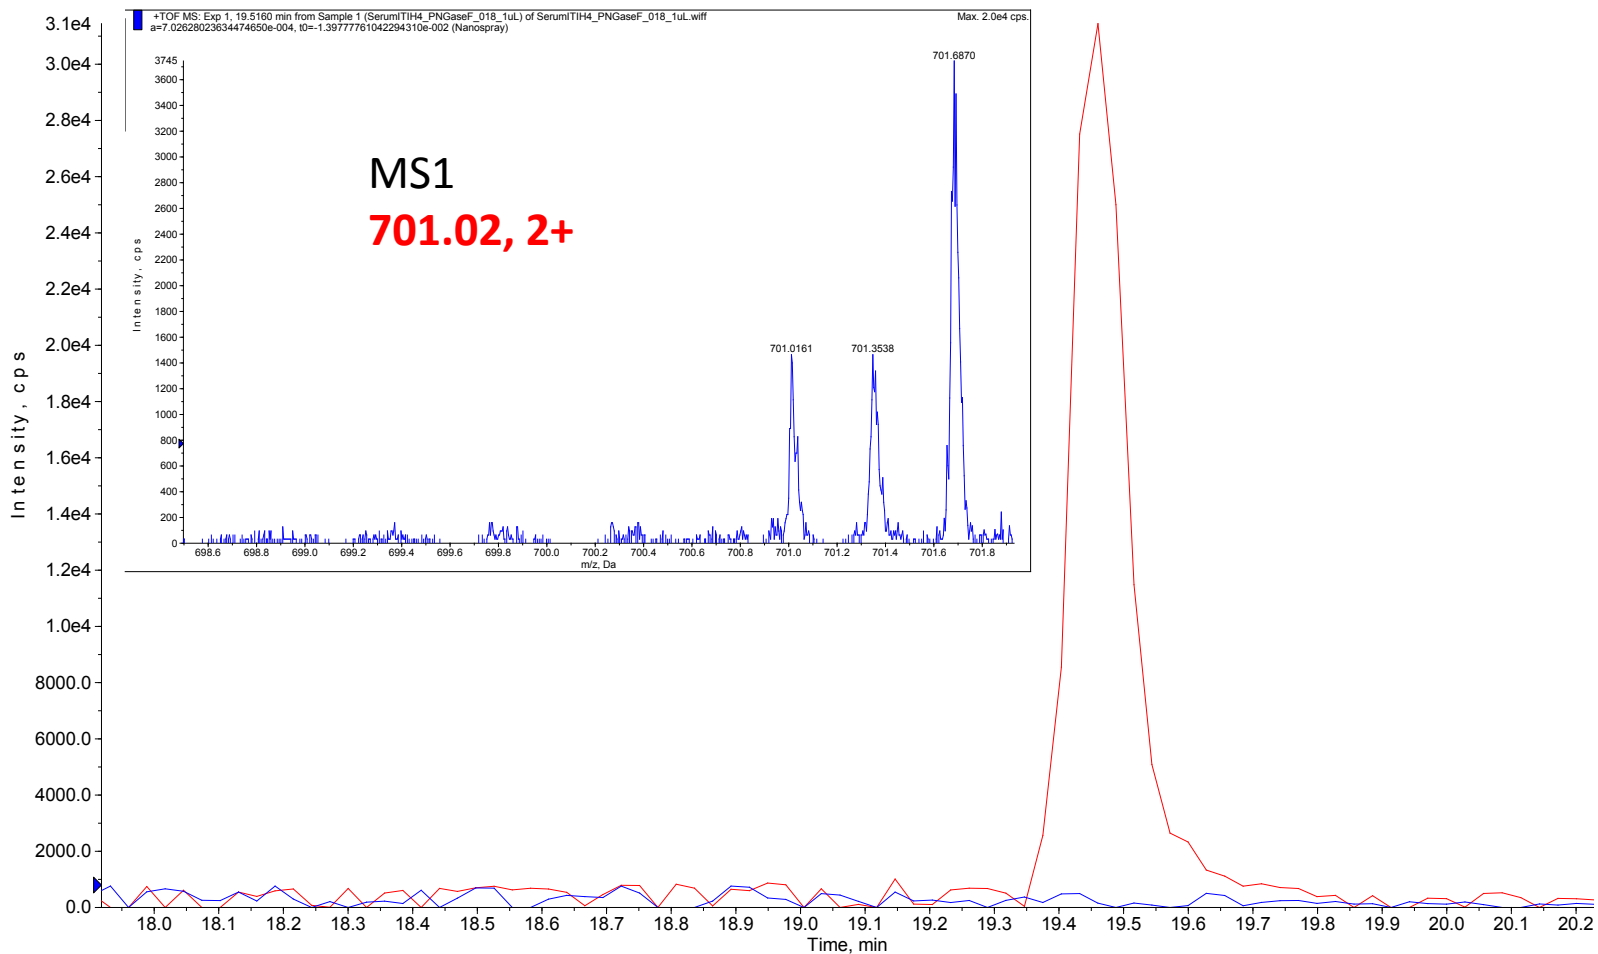

**Note:** In MS1, can't see unlabeled peptide. The labeled ion intensity max = 4000 cps at Retention Time 19.46 min. Can see an (unrelated) ion near, I=278 cps, good isotope cluster; if labeled peptide is present but lower than this ion, STFMTNQLVDALTTWQNK >90% occupancy

**Site: N207 (Peptide: STFMTNQLVDALTTWQNK )**

**File: SerumITI4\_PNGaseF\_O18\_1uL.wiff**

Labeled (**701.02, 3+**) detected

Retention Time: 19.5 min (short gradient, 30 min)

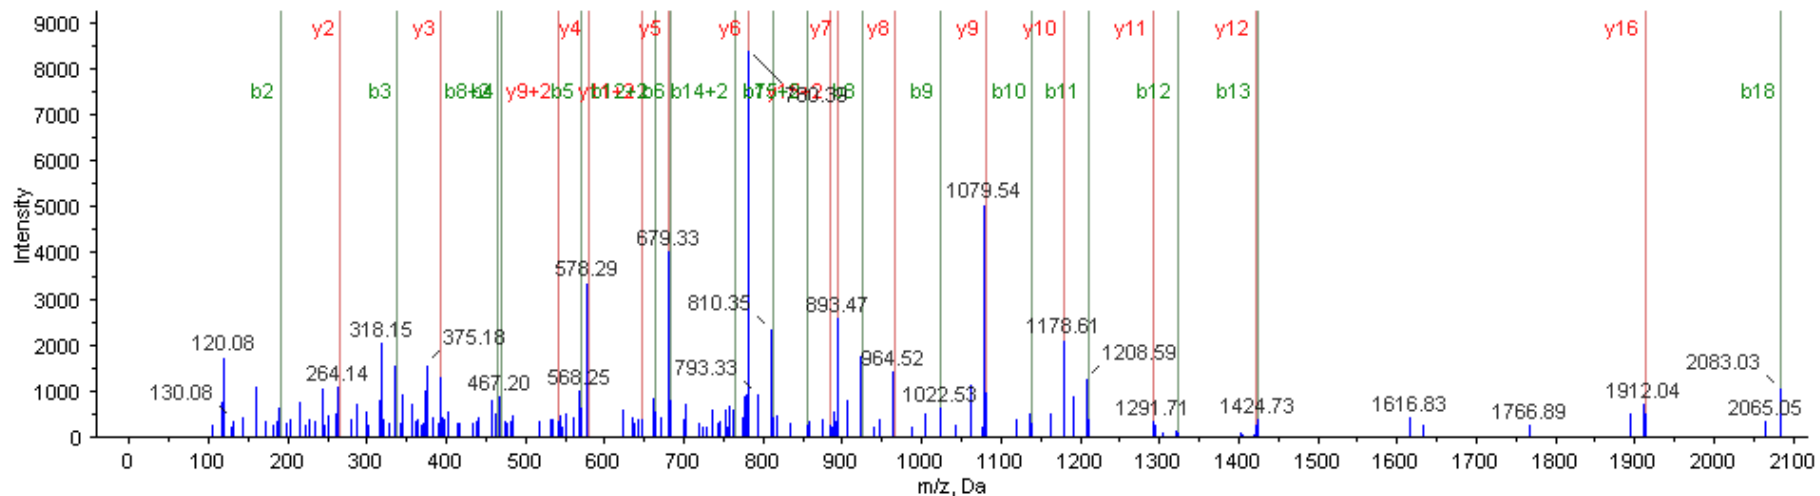

Fragmentation Evidence (peptide b- and y-ions) for N>D/O18 (3 Da shift) at glycosylation site

| Residue | b         | b+2       | y         | y+2      |
|---------|-----------|-----------|-----------|----------|
| N       | 682.2865  | 341.6469  | 1533.8032 | 767.4052 |
| Q       | 810.3451  | 405.6762  | 1419.7602 | 710.3838 |
| L       | 923.4291  | 462.2182  | 1291.7016 | 646.3545 |
| V       | 1022.4975 | 511.7524  | 1178.6176 | 589.8124 |
| D       | 1137.5245 | 569.2659  | 1079.5492 | 540.2782 |
| A       | 1208.5616 | 604.7844  | 964.5222  | 482.7648 |
| L       | 1321.6457 | 661.3265  | 893.4851  | 447.2462 |
| T       | 1422.6933 | 711.8503  | 780.4010  | 390.7042 |
| T       | 1523.7410 | 762.3741  | 679.3534  | 340.1803 |
| W       | 1709.8203 | 855.4138  | 578.3057  | 289.6565 |
| Q       | 1837.8789 | 919.4431  | 392.2264  | 196.6168 |
| N[DeW]  | 1954.9339 | 977.9706  | 264.1678  | 132.5875 |
| K       | 2083.0289 | 1042.0181 | 147.1128  | 74.0600  |

**Site: N207 (Peptide: ALTTWQNK )**

**File: SerumITI4\_PNGaseF\_O18\_1uL.wiff**

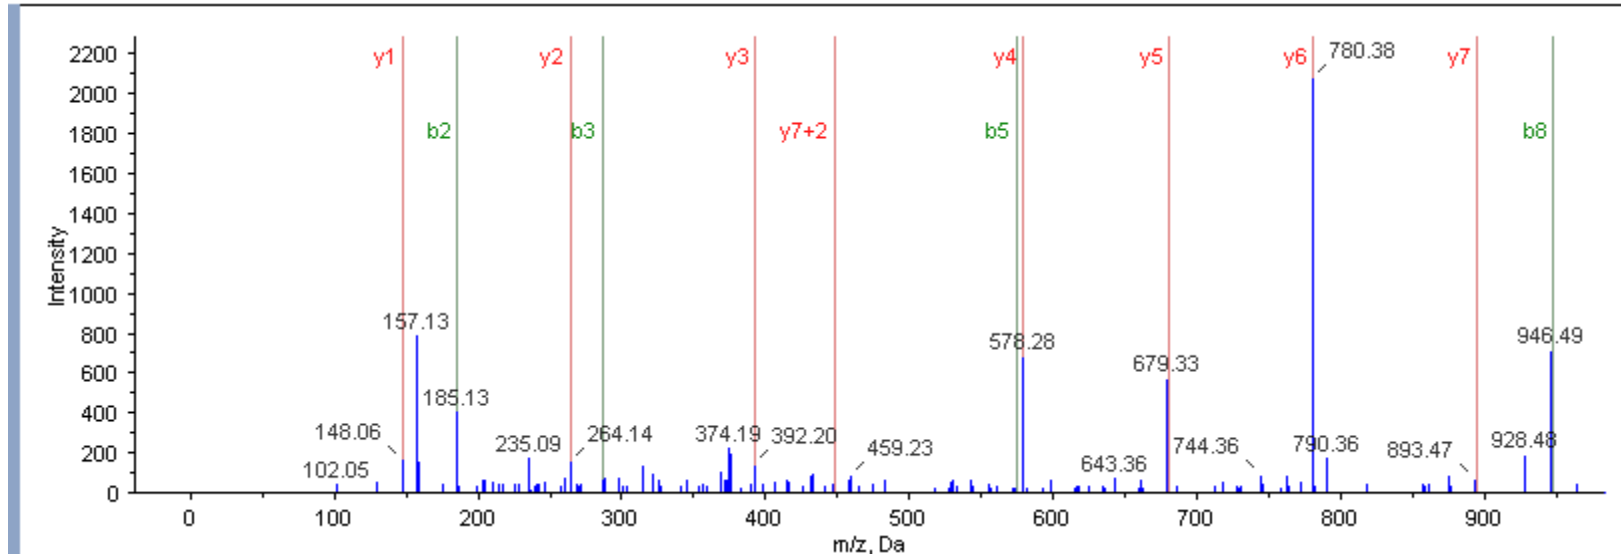

Fragmentation Evidence (peptide b- and y-ions) for N>D/O18 (3 Da shift) at glycosylation site

| Residue | b        | b+2      | y        | y+2      |
|---------|----------|----------|----------|----------|
| A       | 72.0444  | 36.5258  | 964.5222 | 482.7648 |
| L       | 185.1285 | 93.0679  | 893.4851 | 447.2462 |
| T       | 286.1761 | 143.5917 | 780.4010 | 390.7042 |
| T       | 387.2238 | 194.1155 | 679.3534 | 340.1803 |
| W       | 573.3031 | 287.1552 | 578.3057 | 289.6565 |
| Q       | 701.3617 | 351.1845 | 392.2264 | 196.6168 |
| N[DeW]  | 818.4167 | 409.7120 | 264.1678 | 132.5875 |
| K       | 946.5117 | 473.7595 | 147.1128 | 74.0600  |

Serum ITIH4, N274

Site: **N274 (Peptide: NVVFVIDK)** File: SerumITI4\_PNGaseF\_O18\_1uL.wiff

Unlabeled (**467.27, 2+**) detected, labeled (**468.78, 2+**) not detected

Retention Time: 15.8 min (short gradient, 30 min)

■ XIC of +TOF MS: Exp 1, 467.24 to 467.3 Da from Sample 1 (SerumITI4\_PNGaseF\_O18\_1uL) of SerumITI4\_PNGaseF\_O18\_1uL.wiff (Nanospray)

■ XIC of +TOF MS: Exp 1, 468.75 Da from Sample 1 (SerumITI4\_PNGaseF\_O18\_1uL) of SerumITI4\_PNGaseF\_O18\_1uL.wiff (Nanospray)

■ XIC of +TOF MS: Exp 1, 467.24 to 467.3 Da from Sample 1 (SerumITI4\_PNGaseF\_O18\_1uL) of SerumITI4\_PNGaseF\_O18\_1uL.wiff... Max. 6.1e5 cps.

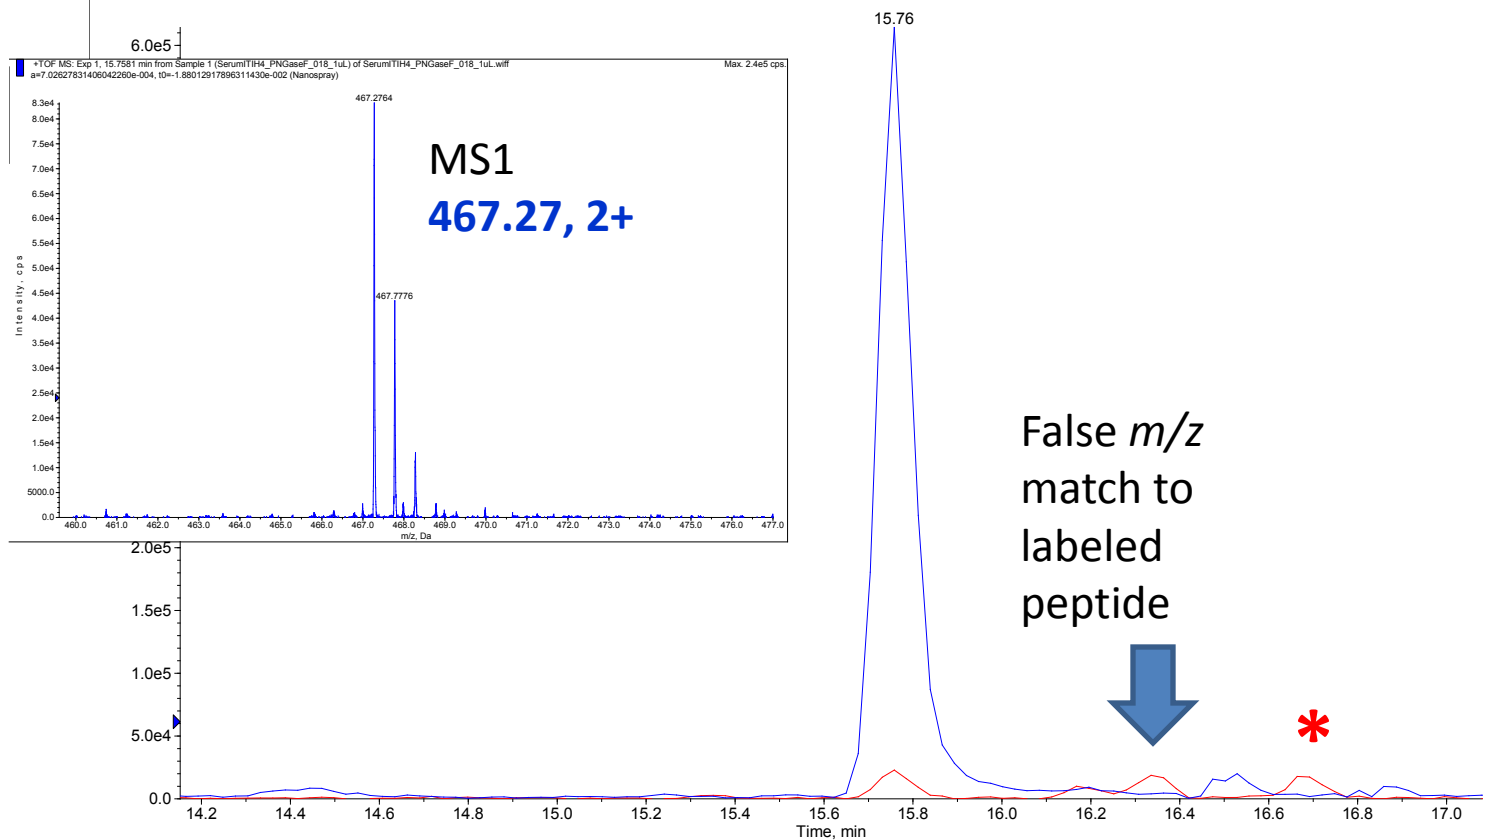

\* **Note:** In MS1, see 1000 cps, or approx 1% of labeled peptide signal, and 8.3e4 cps unlabeled peptide intensity. Therefore, NVVFVIDK ~1% occupancy. This is about 1 min difference in Retention Time, larger than expected for short gradient, so we indicate <1% occupancy.



## N274: NVVFVIDK Occupancy (N>D/O18)

Unlabeled peptide: 2+ (MW), 467.255 to 467.295

File: KBC\_283\_2\_001\_ITIH4\_Serum\_TG\_PNGaseF\_O18\_1uL.wiff

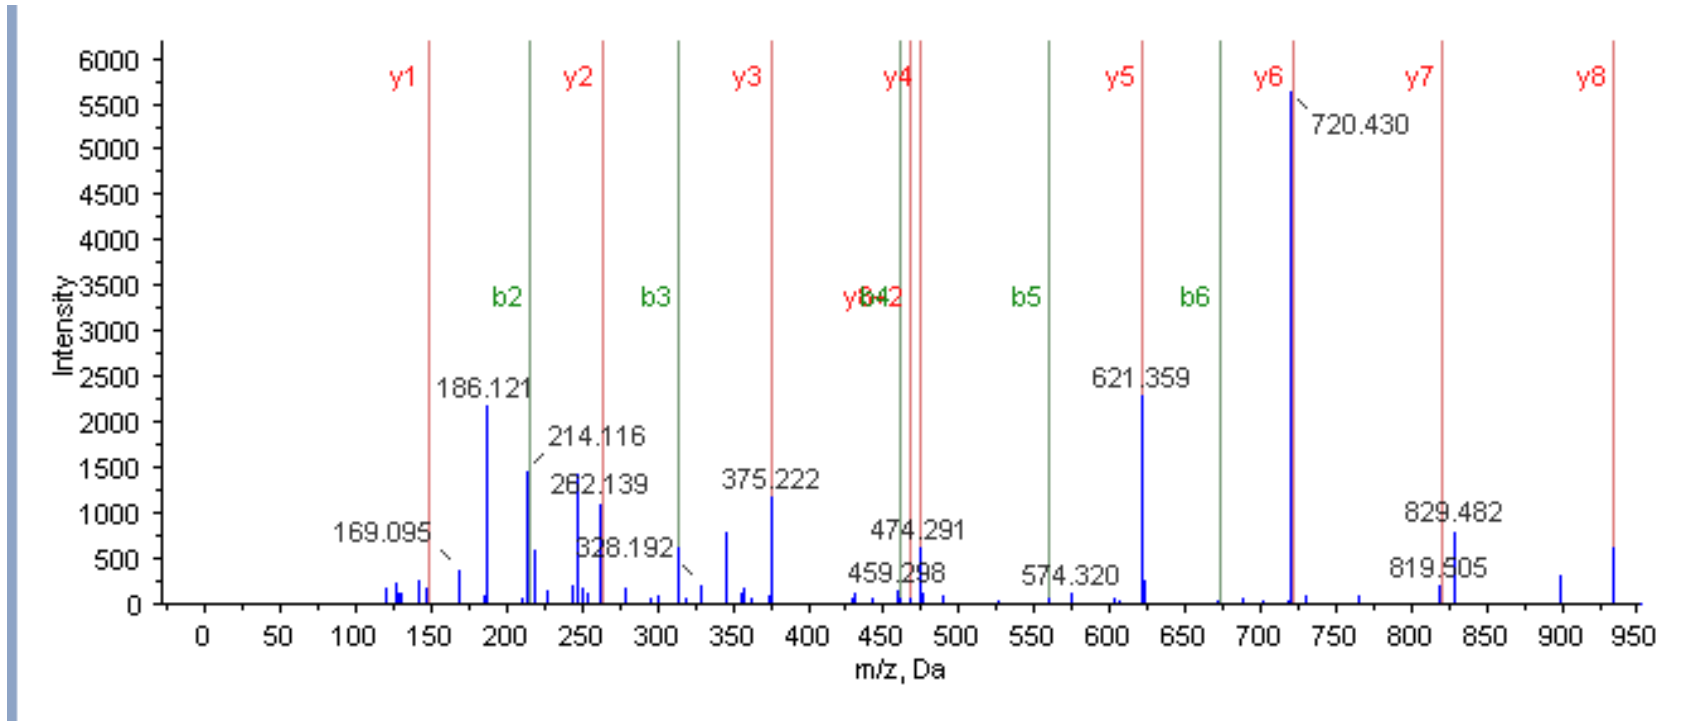

| Residue | b               | b+2      | y               | y+2             |
|---------|-----------------|----------|-----------------|-----------------|
| N       | 115.0502        | 58.0287  | <b>933.5404</b> | <b>467.2738</b> |
| V       | <b>214.1186</b> | 107.5629 | <b>819.4975</b> | 410.2524        |
| V       | <b>313.1870</b> | 157.0972 | <b>720.4291</b> | 360.7182        |
| F       | <b>460.2554</b> | 230.6314 | <b>621.3606</b> | 311.1840        |
| V       | <b>559.3239</b> | 280.1656 | <b>474.2922</b> | 237.6498        |
| I       | <b>672.4079</b> | 336.7076 | <b>375.2238</b> | 188.1155        |
| D       | 787.4349        | 394.2211 | <b>262.1397</b> | 131.5735        |
| K       | 915.5298        | 458.2686 | <b>147.1128</b> | 74.0600         |

## N274: **N**VVFVIDK Occupancy (N>D/O18)

Labeled peptide: **2+** (MW), 468.740 to 468.780

File: KBC 283 2 001 ITIH4 Serum TG PNGaseF O18 1uL.wiff

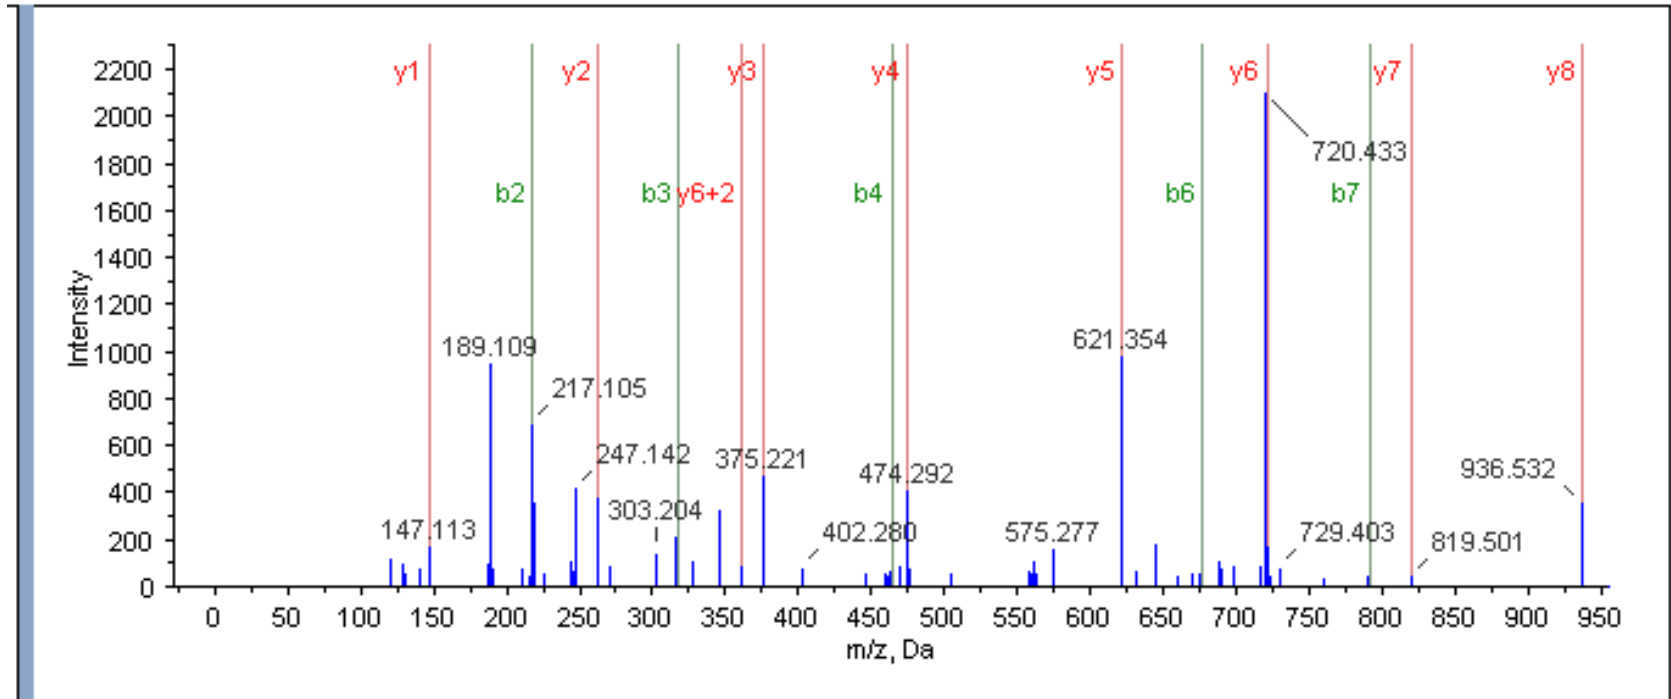

| Residue | b        | b+2      | y        | y+2      |
|---------|----------|----------|----------|----------|
| N[DeW]  | 118.0623 | 59.5348  | 936.5525 | 468.7799 |
| V       | 217.1307 | 109.0690 | 819.4975 | 410.2524 |
| V       | 316.1991 | 158.6032 | 720.4291 | 360.7182 |
| F       | 463.2675 | 232.1374 | 621.3606 | 311.1840 |
| V       | 562.3359 | 281.6716 | 474.2922 | 237.6498 |
| I       | 675.4200 | 338.2136 | 375.2238 | 188.1155 |
| D       | 790.4469 | 395.7271 | 262.1397 | 131.5735 |
| K       | 918.5419 | 459.7746 | 147.1128 | 74.0600  |

Fragmentation Evidence (peptide b- and y-ions) for N>D/O18 (3 Da shift) at glycosylation site

Serum ITIH4, N517

**Site: N517 (Peptide: LPTQNITFQTE)**

File: SerumITI4\_PNGaseF\_O18\_1uL.wiff

LPTQNITFQTE – unlabeled (**646.33, 2+**) not detected, labeled (**647.84, 2+**) detected

Retention Time: 16.2 min (short gradient, 30 min)

- XIC of +TOF MS: Exp 1, 646.3 to 646.36 Da from Sample 1 (SerumITI4\_PNGaseF\_O18\_1uL) of SerumITI4\_PNGaseF\_O18\_1uL.wiff (Nanospray)
- XIC of +TOF MS: Exp 1, 647.81 to 647.87 Da from Sample 1 (SerumITI4\_PNGaseF\_O18\_1uL) of SerumITI4\_PNGaseF\_O18\_1uL.wiff (Nanospray)

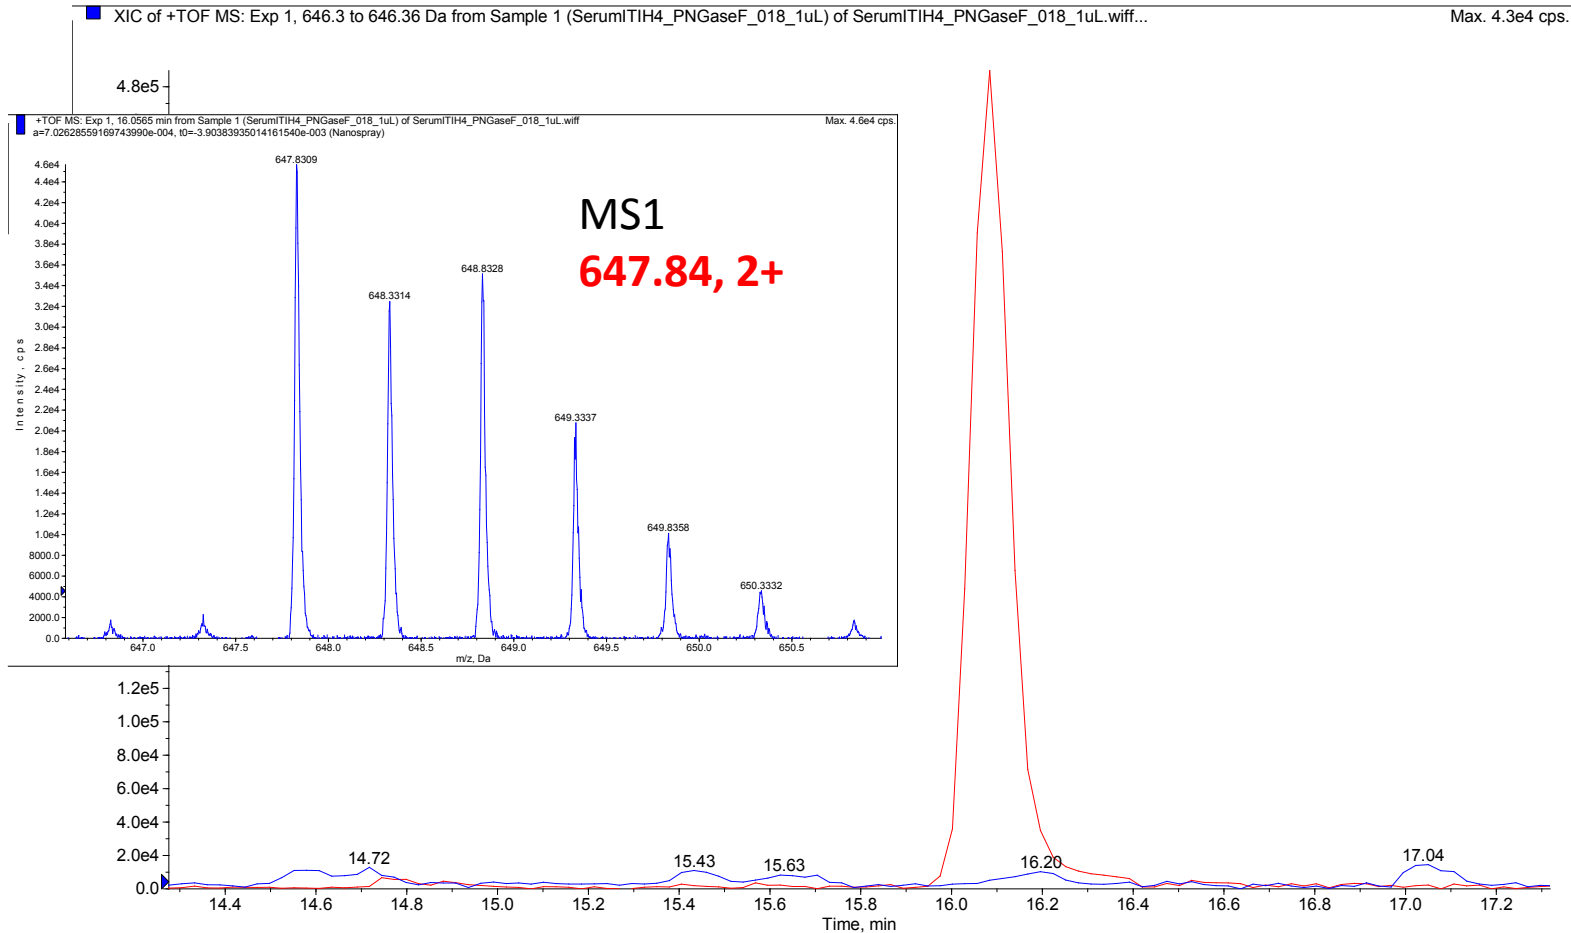

**Note:** In MS1, there may be unlabeled peptide present at Retention Time 15.68 min (close to baseline),  $m/z$  646.33,2+, Intensity= 1000 cps. LABELED peptide 4.5e4 cps. Therefore, occupancy >98% (based on intensity).

## Serum ITIH4, N517: LPTQ NITFQTE Occupancy (N>D/O18)

Unlabeled peptide: 646.3277, 2+ (MW 1290.6395), 646.2877 to 646.3577

Labeled peptide: 647.8249, 2+ (MW 1293.6340), 647.7949 to 647.8549

File: KBC\_283\_2\_001\_ITIH4\_Serum\_TG\_PNGaseF\_O18\_1uL.wiff

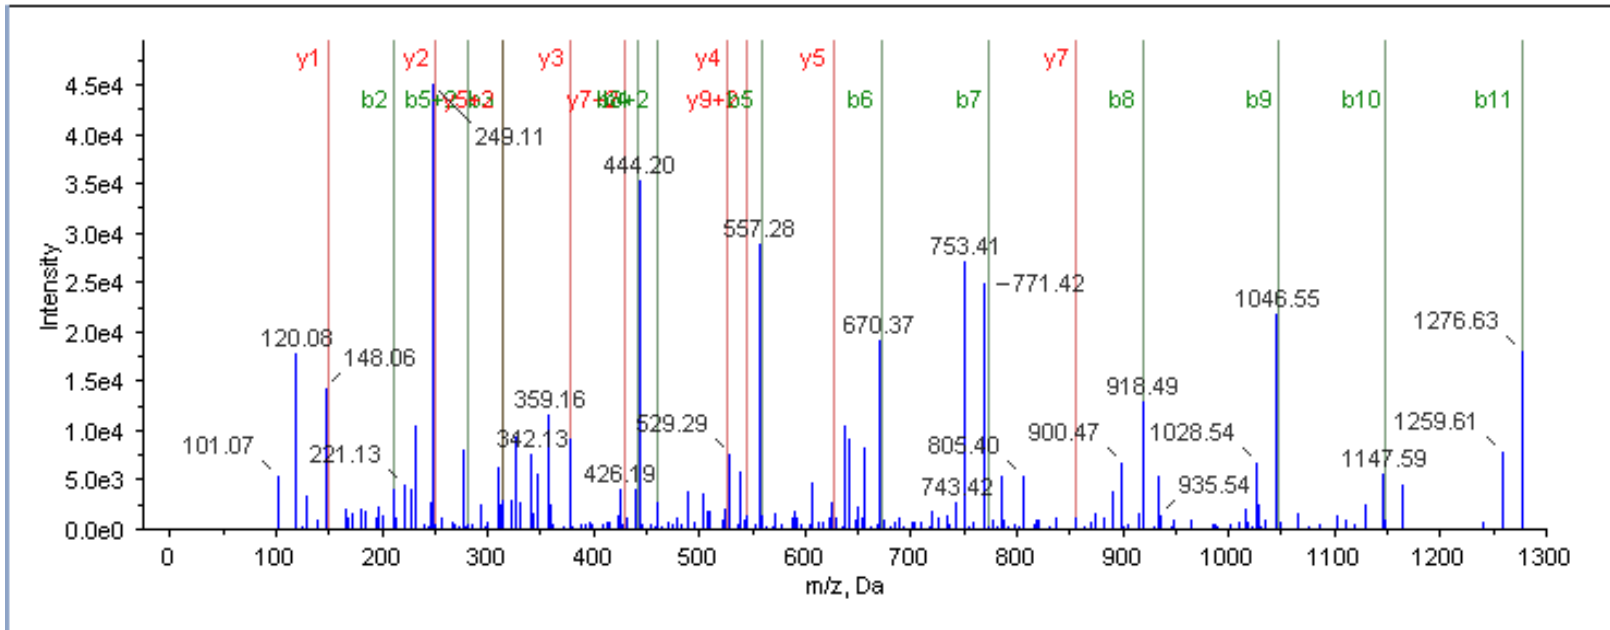

Fragmentation Evidence (peptide b- and y-ions) for N>D/O18 (3 Da shift) at glycosylation site

| Residue | b                | b+2             | y               | y+2             |
|---------|------------------|-----------------|-----------------|-----------------|
| L       | 114.0913         | 57.5493         | 1294.6649       | 647.8361        |
| P       | <b>211.1441</b>  | 106.0757        | 1181.5809       | 591.2941        |
| T       | <b>312.1918</b>  | 156.5995        | 1084.5281       | <b>542.7677</b> |
| Q       | <b>440.2504</b>  | 220.6288        | 983.4804        | 492.2438        |
| N[DeW]  | <b>557.3054</b>  | <b>279.1563</b> | <b>855.4218</b> | <b>428.2146</b> |
| I       | <b>670.3894</b>  | 335.6983        | 738.3668        | 369.6871        |
| T       | <b>771.4371</b>  | 386.2222        | <b>625.2828</b> | <b>313.1450</b> |
| F       | <b>918.5055</b>  | <b>459.7564</b> | <b>524.2351</b> | 262.6212        |
| Q       | <b>1046.5641</b> | 523.7857        | <b>377.1667</b> | 189.0870        |
| T       | <b>1147.6118</b> | 574.3095        | <b>249.1081</b> | 125.0577        |
| E       | <b>1276.6544</b> | 638.8308        | <b>148.0604</b> | 74.5339         |

Serum ITIH4, N577

**Site: N577 (Peptide: NQALNLSLAYSFVTPLTMVVTKPDDQE)** File: SerumITI4\_PNGaseF\_018\_1uL.wiff

Unlabeled (**1027.85, 3+**) not detected, labeled (**1028.86, 3+**) detected

Retention Time: 20.45 min (short gradient, 30 min)

- XIC of +TOF MS: Exp 1, 1027.82 to 1027.88 Da from Sample 1 (SerumITI4\_PNGaseF\_018\_1uL) of SerumITI4\_PNGaseF\_018\_1uL.wiff (Nanospray)
- XIC of +TOF MS: Exp 1, 1028.83 to 1028.89 Da from Sample 1 (SerumITI4\_PNGaseF\_018\_1uL) of SerumITI4\_PNGaseF\_018\_1uL.wiff (Nanospray)

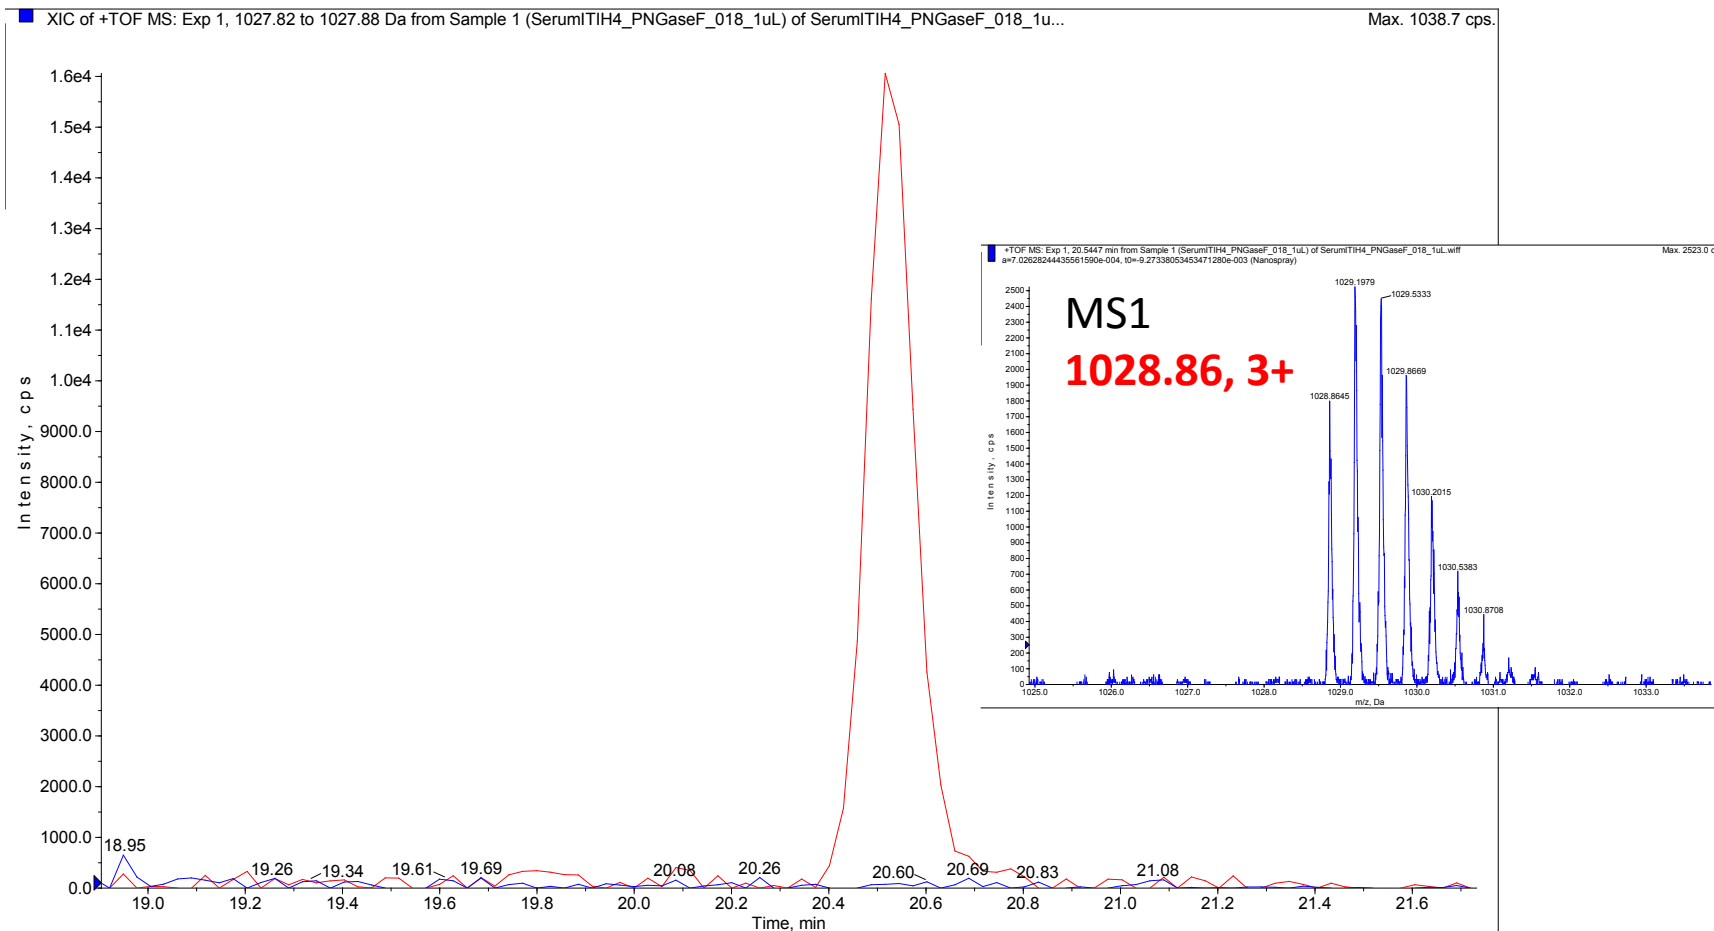

**Note:** In MS1, do not detect unlabeled peptide. Ions with a similar mass range at 150 cps can be observed. Therefore, if unlabeled peptide is below 150 cps, and LABELED peptide is at Intensity = 2734 cps, occupancy > 95%.

**Site: N577 (Peptide: NQALNLSLAY)** File: KBC\_283\_2\_001\_ITIH4\_Serum\_TG\_PNGaseF\_O18\_1uL.wiff  
Unlabeled (**553.80, 2+**) not detected, labeled (**555.30, 2+**) detected  
Retention Time: 56.16-56.56 (long gradient, 120 min)

- XIC of +TOF MS: Exp 1, 553.77 to 553.83 Da from Sample 1 (SerumITIH4\_PNGaseF\_O18\_1uL) of SerumITIH4\_PNGaseF\_O18\_1uL.wiff (Nanospray)
- XIC of +TOF MS: Exp 1, 555.27 to 555.33 Da from Sample 1 (SerumITIH4\_PNGaseF\_O18\_1uL) of SerumITIH4\_PNGaseF\_O18\_1uL.wiff (Nanospray)

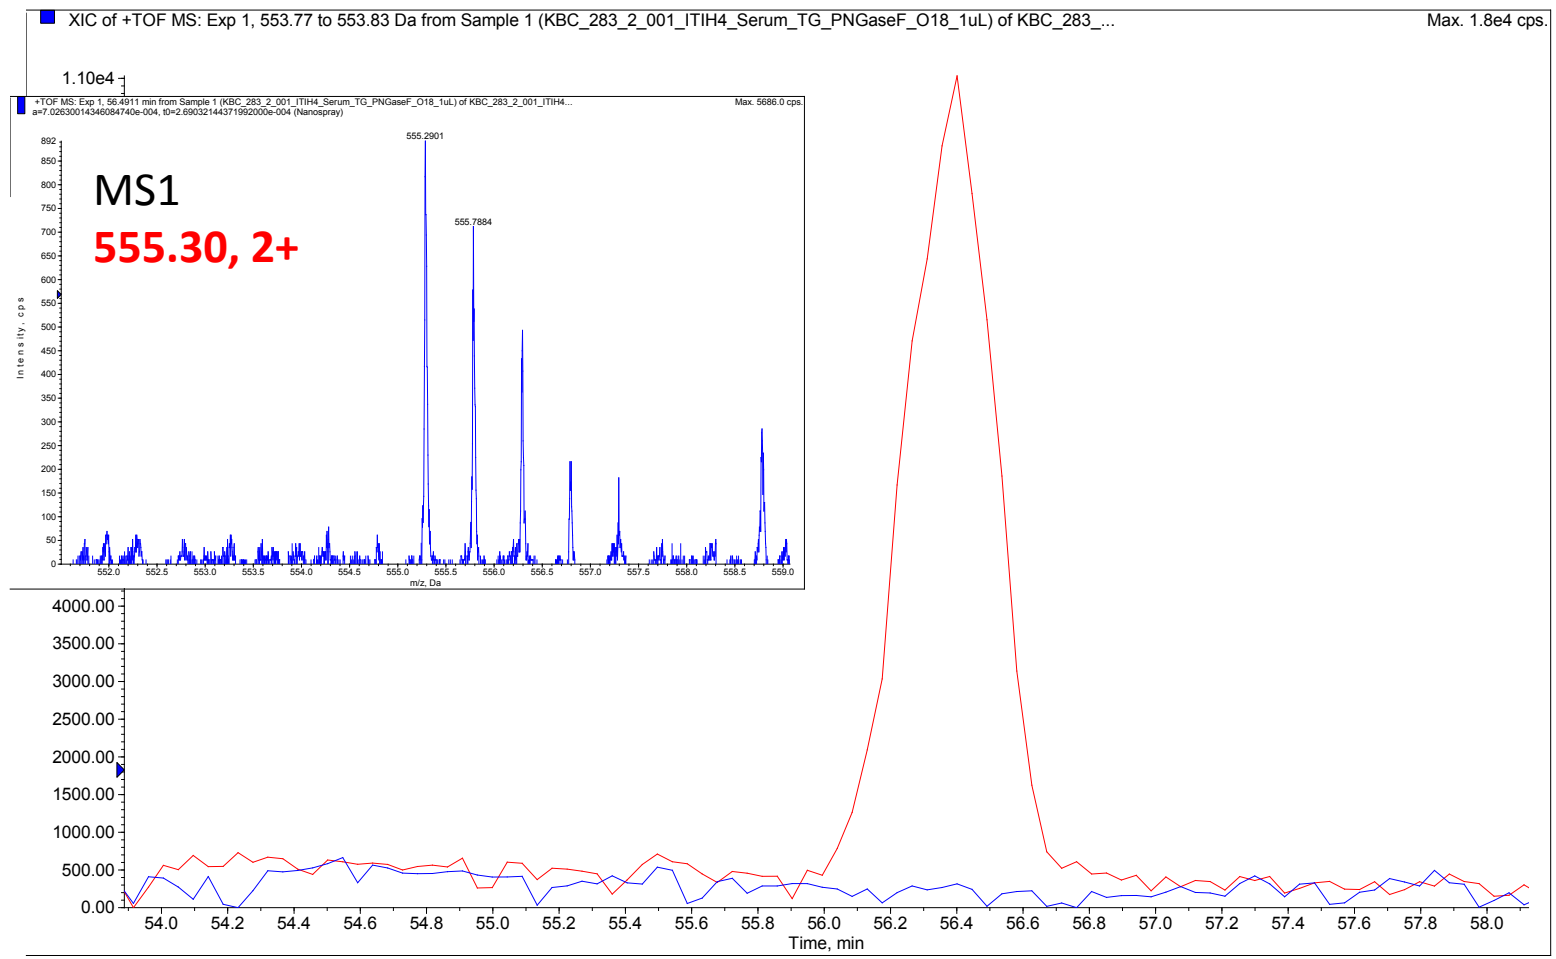

**Note:** Near the limit of detection. In MS1, the lowest ions could see the isotope cluster well were in Intensity = 150 cps range, or approx 10% of signal. So NQALNLSLAY >90% occupancy



# Serum ITIH4, N577: NQALS**N**LSLAY Occupancy (N>D/O18)

Unlabeled peptide: **2+** (MW), to

Labeled peptide: **2+** (MW), to

File: KBC\_283\_2\_001\_ITIH4\_Serum\_TG\_PNGaseF\_O18\_1uL.wiff

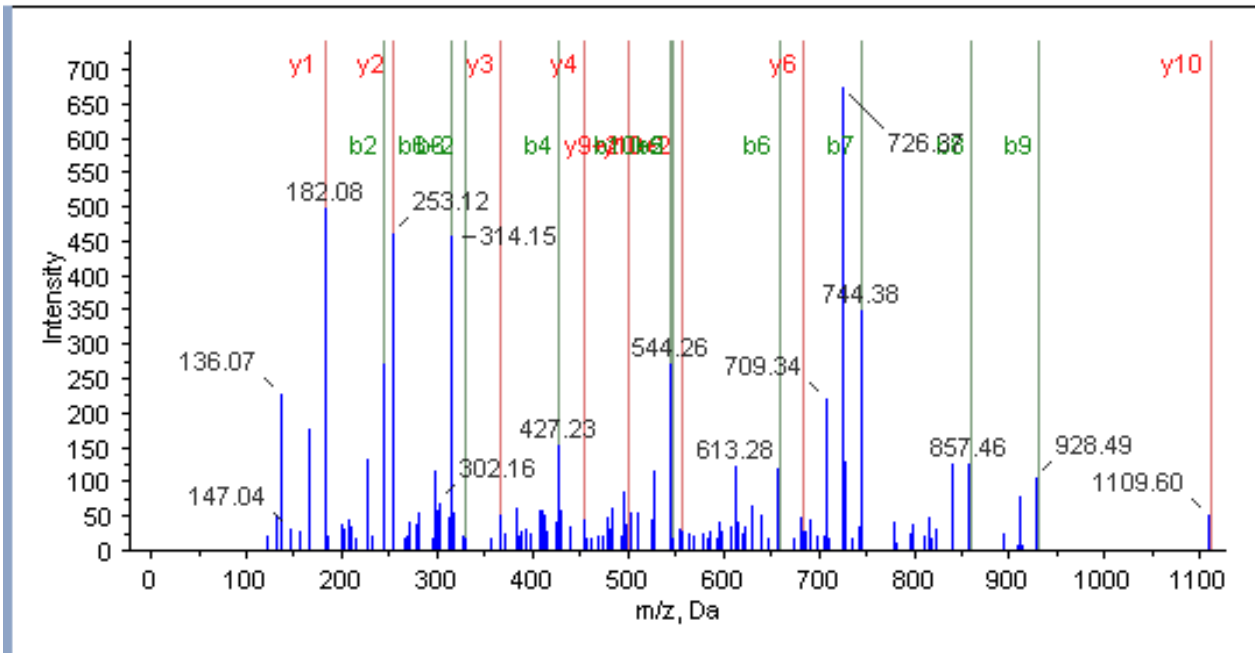

| Residue | b               | b+2             | y                | y+2             |
|---------|-----------------|-----------------|------------------|-----------------|
| N       | 115.0502        | 58.0287         | <b>1109.5961</b> | <b>555.3017</b> |
| Q       | <b>243.1088</b> | 122.0580        | 995.5532         | <b>498.2802</b> |
| A       | <b>314.1459</b> | 157.5766        | 867.4946         | 434.2509        |
| L       | <b>427.2300</b> | 214.1186        | 796.4575         | 398.7324        |
| N[DeW]  | <b>544.2850</b> | 272.6461        | <b>683.3734</b>  | 342.1904        |
| L       | <b>657.3690</b> | <b>329.1881</b> | 566.3184         | 283.6629        |
| S       | <b>744.4010</b> | 372.7042        | <b>453.2344</b>  | 227.1208        |
| L       | <b>857.4851</b> | 429.2462        | <b>366.2023</b>  | 183.6048        |
| A       | <b>928.5222</b> | 464.7648        | <b>253.1183</b>  | 127.0628        |
| Y       | 1091.5856       | <b>546.2964</b> | <b>182.0812</b>  | 91.5442         |

Fragmentation Evidence (peptide b- and y-ions) for N>D/O18 (3 Da shift) at glycosylation site

Only modified peptide can be detected, but at low intensity.

**SerumITIH4\_PNGaseF\_O18\_1uL.wiff (Trypsin + GluC, PNGaseF/180)**  
**Short gradient (30 min)**  
**ProteinPilot results for peptides with N-glycosylation sites**

| Conf   | Sequence                     | Modifications                                 | Prec m/z | Theor m/z | Theor z | Time    |
|--------|------------------------------|-----------------------------------------------|----------|-----------|---------|---------|
| 0.1162 | AFITNFSMIIDGMTYPGIK          | Delta:H(1)O(-1)18O(1)(N)@5;<br>Oxidation(M)@8 | 751.0446 | 751.0553  | 3       | 20.6795 |
| 0.9892 | KAFITNF                      | Delta:H(1)O(-1)18O(1)(N)@6                    | 422.2301 | 422.2404  | 2       | 16.5347 |
| 1.245  | KAFITNFSMIID                 | Delta:H(1)O(-1)18O(1)(N)@6                    | 701.8627 | 701.8741  | 2       | 18.7392 |
| 61.41  | LPTQNITFQTE                  | Delta:H(1)O(-1)18O(1)(N)@5                    | 647.8237 | 647.8361  | 2       | 16.2111 |
| 23.91  | NQALNLSLAY                   | Delta:H(1)O(-1)18O(1)(N)@5                    | 555.2905 | 555.3017  | 2       | 17.7469 |
| 99     | NQALNLSLAYSFVTPLTSMVVTKPDDQE | Delta:H(1)O(-1)18O(1)(N)@5                    | 1028.849 | 1028.857  | 3       | 20.4536 |
| 99     | NVVFVID                      |                                               | 403.2258 | 403.2263  | 2       | 17.9113 |
| 99     | NVVFVIDK                     |                                               | 467.2743 | 467.2738  | 2       | 15.8195 |
| 99     | STFMTNQLVDALTTWQNK           | Delta:H(1)O(-1)18O(1)(N)@17                   | 701.0089 | 701.018   | 3       | 19.4746 |

# KBC\_283\_2\_001\_ITIH4\_Serum\_TG\_PNGaseF\_O18\_1uL.wiff

Long gradient (120 min)

ProteinPilot results for peptides with N-glycosylation sites

| Conf     | Sequence    | Modifications              | dMass    | Prec m/z | Theor m/z | Theor z | Time    |
|----------|-------------|----------------------------|----------|----------|-----------|---------|---------|
| 0.5414   | ALTTWQNK    | Delta:H(1)O(-1)18O(1)(N)@7 | -0.02938 | 482.7501 | 482.7647  | 2       | 24.147  |
| 1.579    | KAFITNF     | Delta:H(1)O(-1)18O(1)(N)@6 | -0.02425 | 422.2282 | 422.2404  | 2       | 47.1421 |
| 92.19    | LPTQNITFQTE | Delta:H(1)O(-1)18O(1)(N)@5 | -0.02375 | 647.8242 | 647.8361  | 2       | 45.648  |
| 0.005132 | LPTQNITFQTE |                            | -0.00621 | 646.327  | 646.3301  | 2       | 34.8314 |
| 42.69    | NQALNLSLAY  | Delta:H(1)O(-1)18O(1)(N)@5 | -0.02232 | 555.2905 | 555.3017  | 2       | 56.2904 |
| 97.26    | NVVFVID     |                            | -0.00266 | 403.225  | 403.2263  | 2       | 55.0064 |
| 2.741    | NVVFVIDK    | Delta:H(1)O(-1)18O(1)(N)@1 | -0.02401 | 468.7679 | 468.7799  | 2       | 47.8217 |
| 99       | NVVFVIDK    |                            | 0.000511 | 467.2741 | 467.2738  | 2       | 43.4274 |
| 0.5379   | TQNITFQTE   | Delta:H(1)O(-1)18O(1)(N)@3 | -0.02376 | 542.7558 | 542.7677  | 2       | 33.0738 |

# Part II:

## N-Glycosylation Site Occupancy In Recombinant ITIH4

- Recombinant ITIH4 was treated with GluC and Trypsin, (or Trypsin and Chymotrypsin) heated to denature proteases, then treated with PNGaseF in the presence of  $\text{H}_2^{18}\text{O}$
- 0.1 ug of the digest was injected onto an Eksigent ChromXP C18-CL interfaced with a 5600 TripleTOF mass spectrometer (ABSCIEX)
- Different chromatographic gradients were used (short gradient, 30 min; long gradient, 120 min)

# Recombinant ITIH4 Occupancy Summary

| Site        | Peptide(s)                     | <i>m/z</i> (charge)<br>Unlabeled | <i>m/z</i> (charge)<br>Labeled | Cell<br>ITIH4 |
|-------------|--------------------------------|----------------------------------|--------------------------------|---------------|
| <b>N81</b>  | KAFIT <u>N</u> F (T,G)         | 420.734 (2+)                     | 422.240 (2+)                   | >80%          |
| <b>N207</b> | MTNQLVDALTTWQ <u>N</u> K (T,C) | 881.943 (3+)                     | 883.449 (3+)                   | >97%          |
| <b>N274</b> | <u>N</u> VVFVIDK (T,G)         | 467.274 (2+)                     | 468.780 (2+)                   | <1%           |
| <b>N517</b> | LPTQ <u>N</u> ITFQTE (T,G)     | 646.330 (2+)                     | 647.836 (2+)                   | >99%          |
| <b>N577</b> | NQAL <u>N</u> LSLAY (T,C)      | 553.796 (2+)                     | 555.302 (3+)                   | >90%          |

Recombinant ITIH4, N81

**Site: N81 (Peptide: KAFITNF) File: KBC\_278\_ITIH4\_HEK\_TG\_PNGaseF\_O18\_1uL.wiff**

**Unlabeled peptide: 420.7360, 2+; Labeled peptide: 422.2291, 2+**

**Retention Time: 48 min (long gradient)**

■ XIC of +TOF MS: Exp 1, 420.72 to 420.76 Da from Sample 1 (KBC\_278\_ITIH4\_HEK\_TG\_PNGaseF\_O18\_1uL) of KBC\_278\_ITIH4\_HEK\_TG\_PNGaseF\_O18\_1uL.wiff (Nanospray)

■ XIC of +TOF MS: Exp 1, 422.21 to 422.25 Da from Sample 1 (KBC\_278\_ITIH4\_HEK\_TG\_PNGaseF\_O18\_1uL) of KBC\_278\_ITIH4\_HEK\_TG\_PNGaseF\_O18\_1uL.wiff (Nanospray)

■ XIC of +TOF MS: Exp 1, 420.72 to 420.76 Da from Sample 1 (KBC\_278\_ITIH4\_HEK\_TG\_PNGaseF\_O18\_1uL) of KBC\_278\_ITIH4\_H... Max. 4662.0 cps.

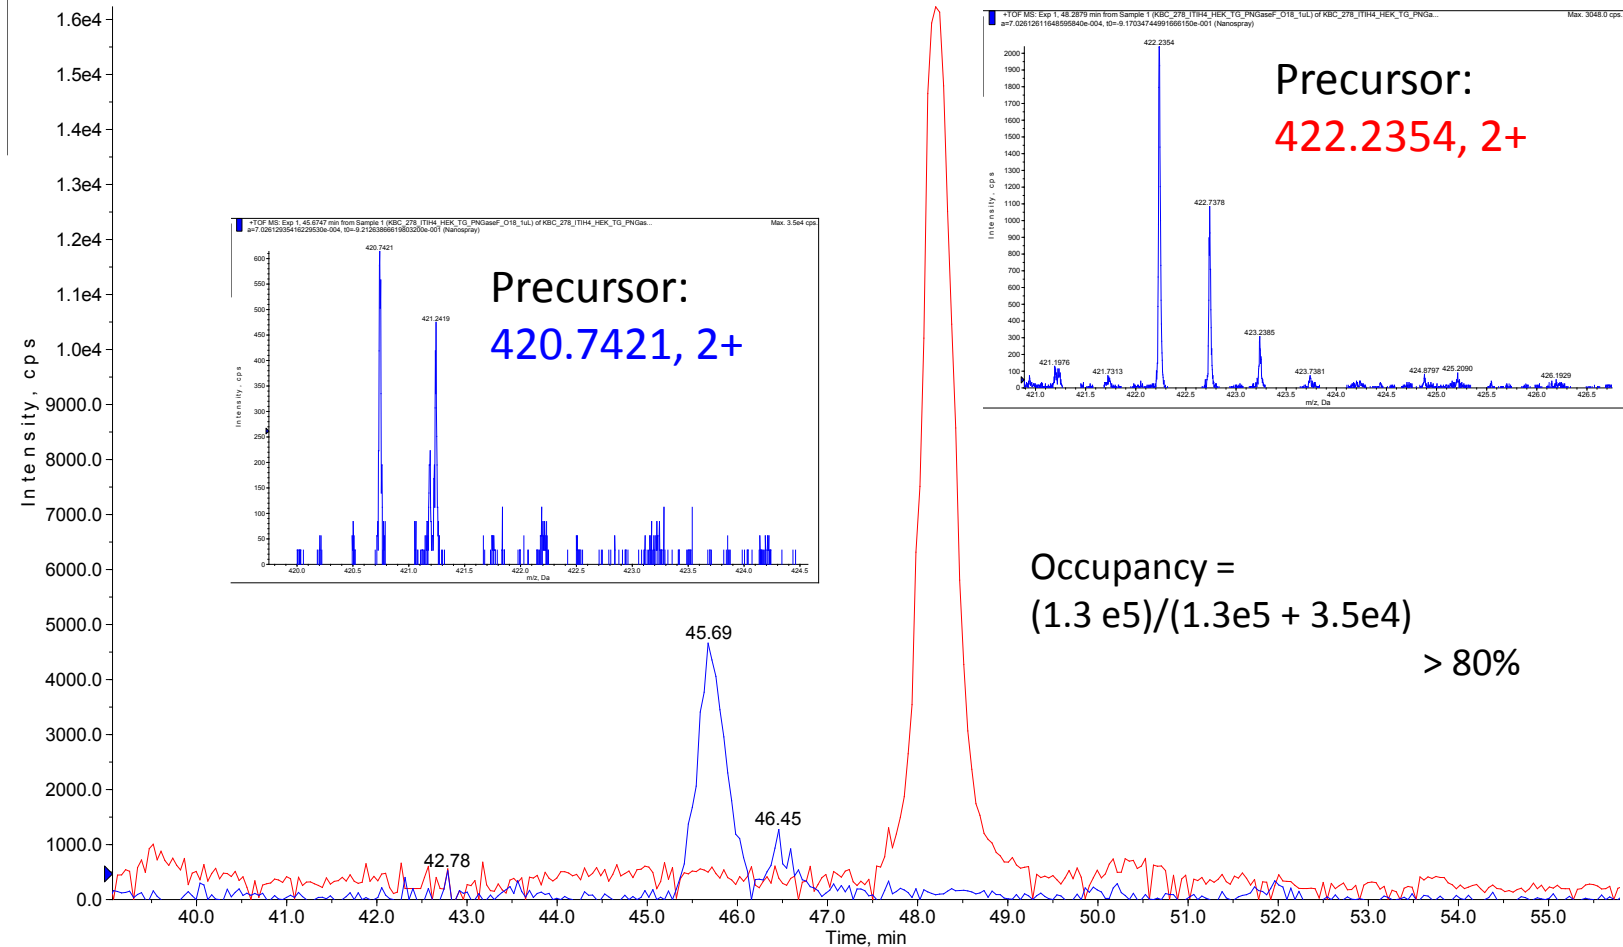

**Note:** The unlabeled and labeled peptides differ in retention time by a larger-than-expected time. There is MS/MS evidence of the labeled peptide, therefore, we conclude that the Occupancy > 80%

Recombinant ITIH4, N207



# Site N207: MTNQLVDALTTWQNK

## KBC\_288\_004: HEK ITIH4 + Trypsin + Chymotrypsin + PNGaseF / O18

**Unlabeled: 881.9432, 2+** not detected; **Labeled: 883.4493, 2+**

■ XIC of +TOF MS: Exp 1, 881.91 to 881.97 Da from Sample 1 (KBC\_288\_004\_PNGaseFO18\_1uL) of KBC\_288\_004\_PNGaseFO18\_1uL.wiff (Nanospray)

■ XIC of +TOF MS: Exp 1, 883.42 to 883.48 Da from Sample 1 (KBC\_288\_004\_PNGaseFO18\_1uL) of KBC\_288\_004\_PNGaseFO18\_1uL.wiff (Nanospray)

■ XIC of +TOF MS: Exp 1, 881.91 to 881.97 Da from Sample 1 (KBC\_288\_004\_PNGaseFO18\_1uL) of KBC\_288\_004\_PNGaseFO18\_1uL... Max. 8.0e4 cps.

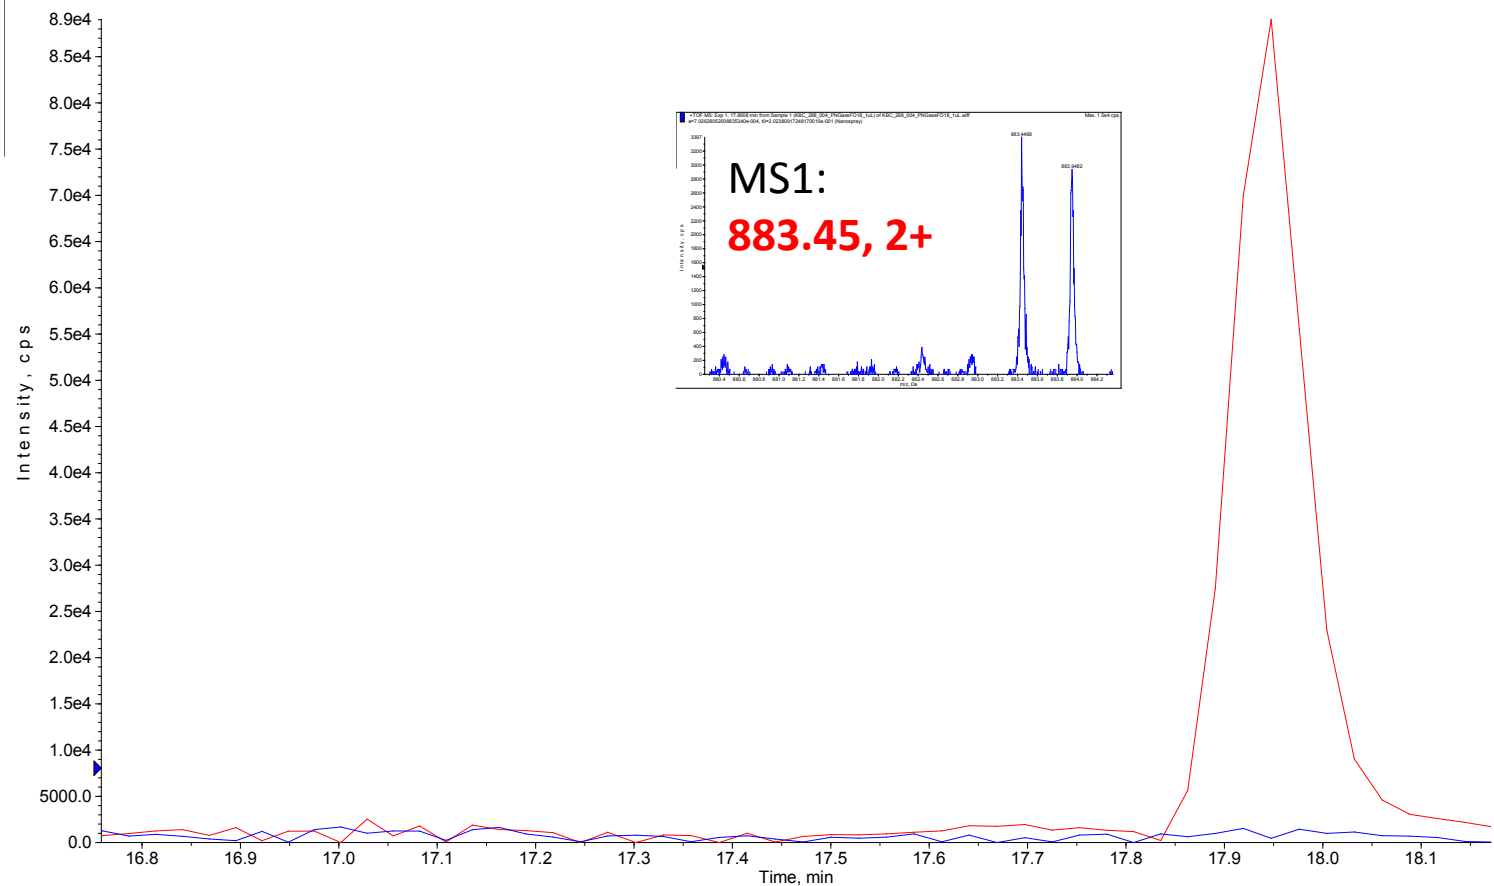

NOTE: Labeled peptide detected at retention time 17.95 min, 9498 cps. Unlabeled peptide is not detected. In the MS spectrum near the expected retention time and m/z, I can see ions as low as about 284 cps. Therefore, estimate that non-labeled peptide is at most 3%, so occupancy is > 97%.

Recombinant ITIH4, N274

Site: **N274** (Peptide: **NVVFVIDK**) File: KBC\_278\_ITIH4\_HEK\_TG\_PNGaseF\_O18\_1uL.wiff

Unlabeled (**467.27, 2+**) detected, labeled (**468.78, 2+**)

Retention Time: 42.5 min (long gradient, 120 min)

- XIC of +TOF MS: Exp 1, 467.24 to 467.3 Da from Sample 1 (HEKITI4\_PNGaseF\_O18\_1uL) of HEKITI4\_PNGaseF\_O18\_1uL.wiff (Nanospray)
- XIC of +TOF MS: Exp 1, 468.75 to 468.81 Da from Sample 1 (HEKITI4\_PNGaseF\_O18\_1uL) of HEKITI4\_PNGaseF\_O18\_1uL.wiff (Nanospray)

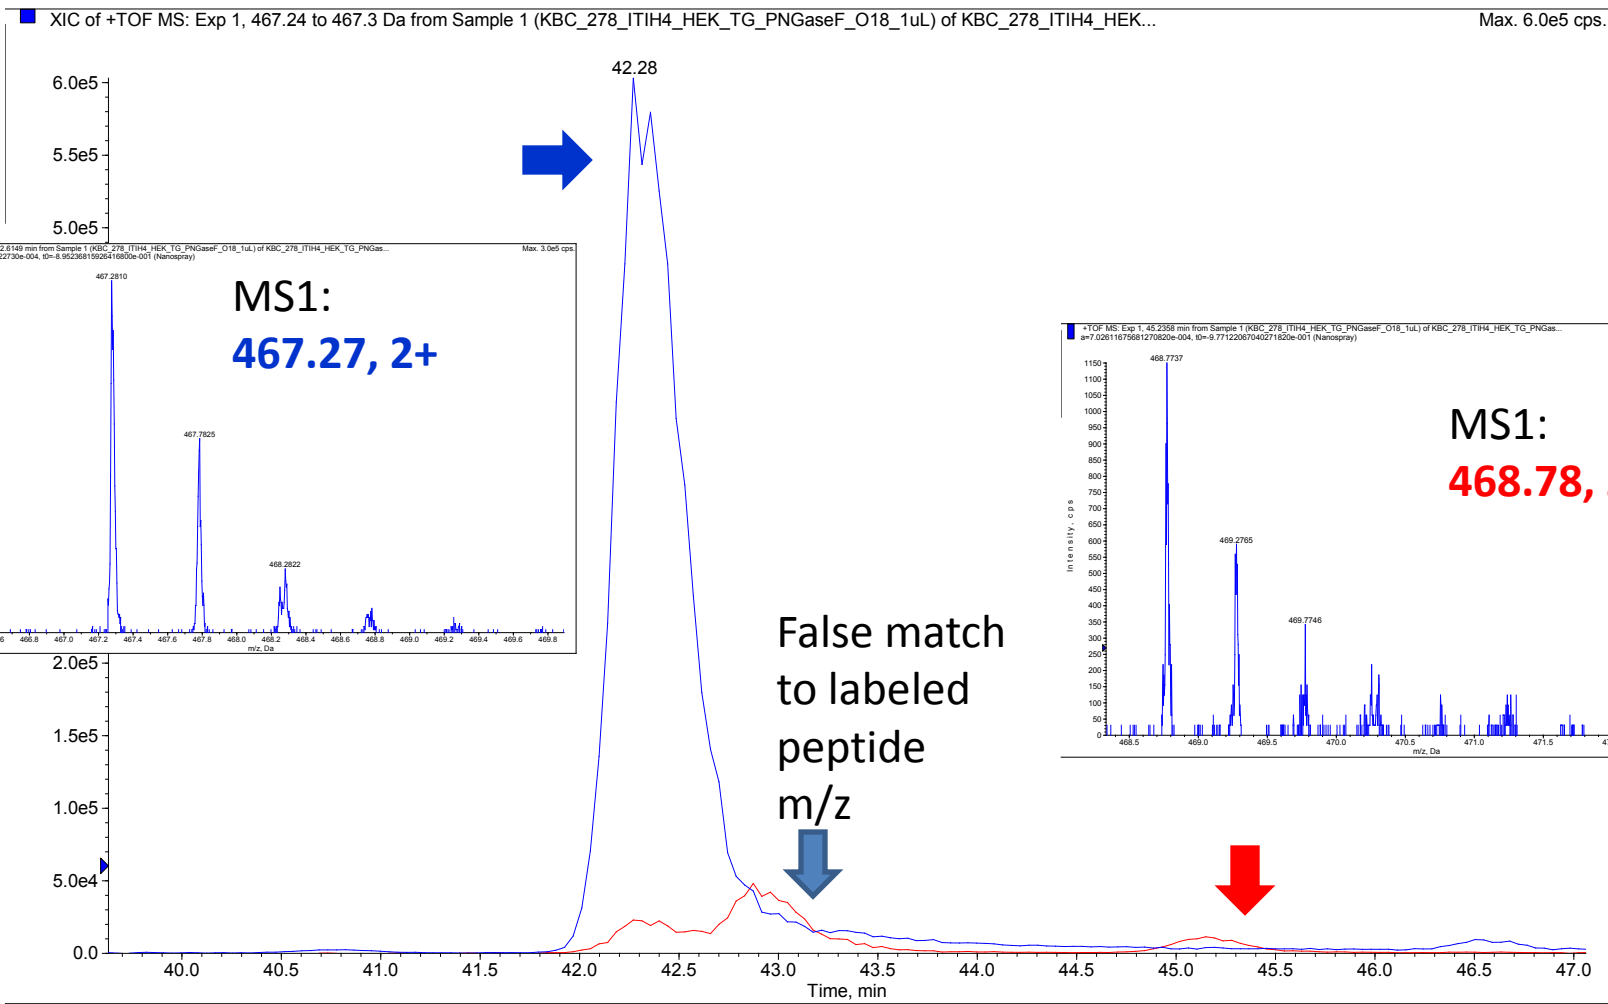

NOTE: Intensity of UNlabeled peptide is 7.7e4 (RT 42.3 min), and intensity of labeled peptide is 1e3 (RT 45.1 min). Therefore, occupancy = 2%. Different in retention time between unlabeled and labeled peptide is greater than expected. At N274, occupancy <1%

Recombinant ITIH4, N517

# Site N517: LPTQNTFQTESSVAEQEAEF

## KBC\_288\_004: HEK ITIH4 + Trypsin + Chymotrypsin + PNGaseF / O18

**Unlabeled: 790.3763, 3+** not detected; **Labeled: 791.3803, 3+**

■ XIC of +TOF MS: Exp 1, 790.35 to 790.41 Da from Sample 1 (KBC\_288\_004\_PNGaseFO18\_1uL) of KBC\_288\_004\_PNGaseFO18\_1uL.wiff (Nanospray)

■ XIC of +TOF MS: Exp 1, 791.35 to 791.41 Da from Sample 1 (KBC\_288\_004\_PNGaseFO18\_1uL) of KBC\_288\_004\_PNGaseFO18\_1uL.wiff (Nanospray)

■ XIC of +TOF MS: Exp 1, 790.34 to 790.42 Da from Sample 1 (KBC\_288\_004\_PNGaseFO18\_1uL) of KBC\_288\_004\_PNGaseFO18\_1uL.wiff (Nanospray) Max. 1.1e4 cps.

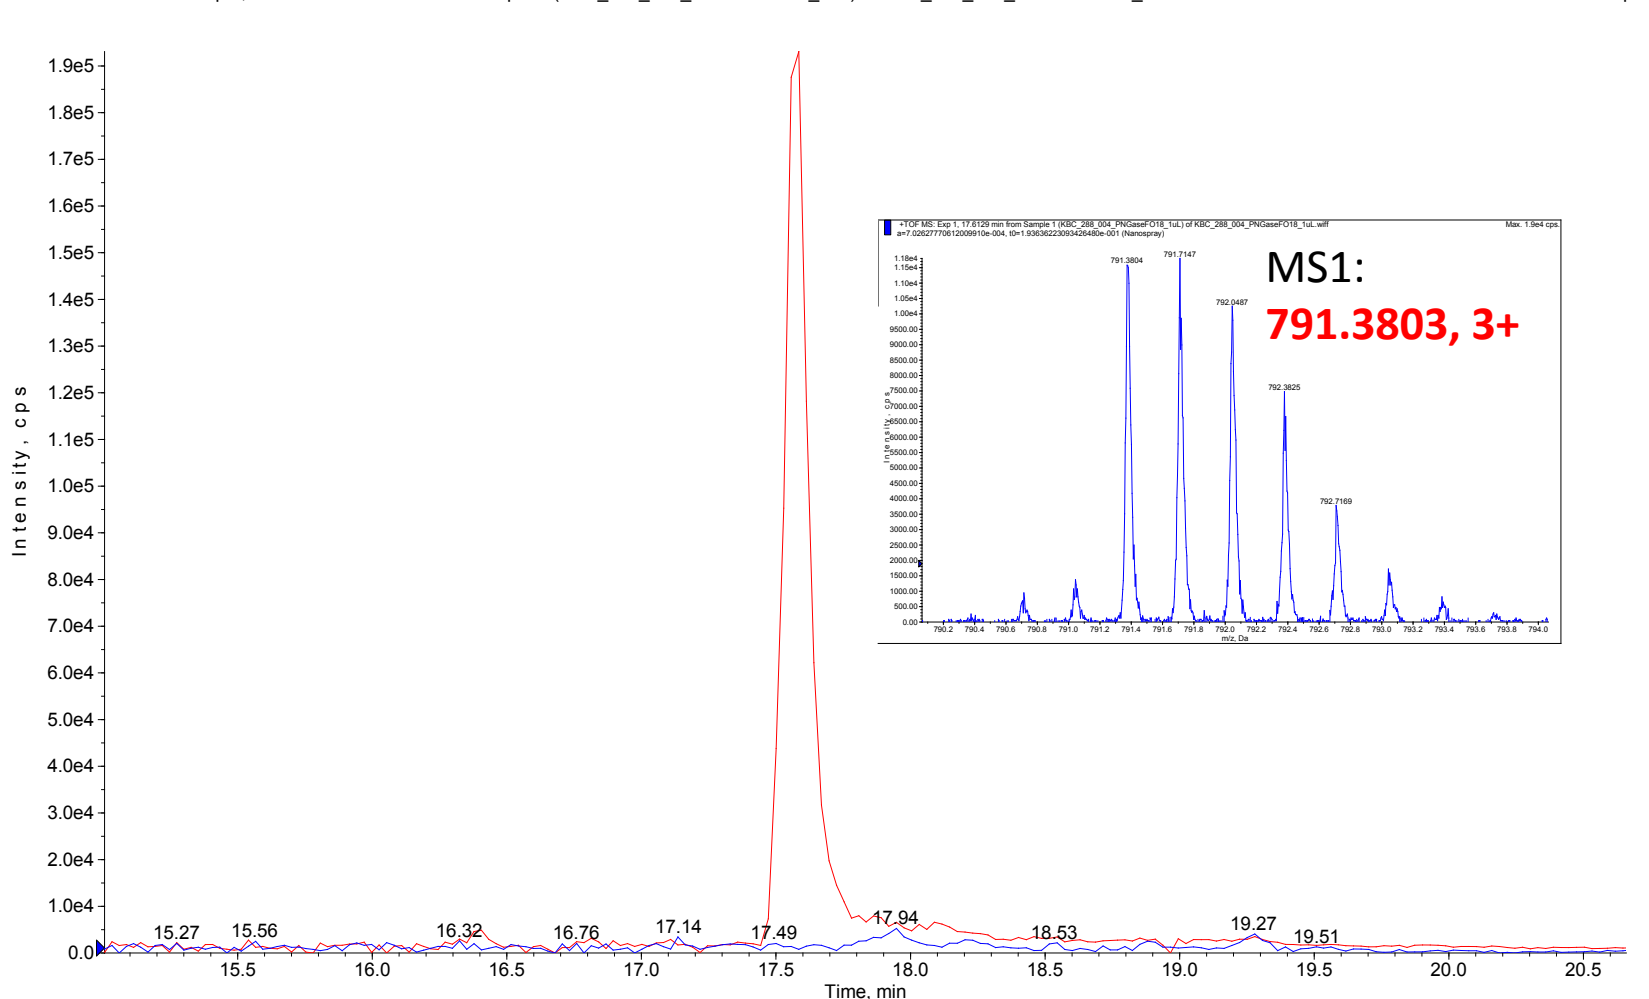

NOTE: Intensity of labeled peptide is 1.9e5, cannot detect unlabeled peptide. Therefore, occupancy is >99%.

Recombinant ITIH4, N577

# Site N577: NQALNLSLAY

## KBC\_288\_004: HEK ITIH4 + Trypsin + Chymotrypsin + PNGaseF / O18

**Unlabeled: 553.796. 2+; Labeled: 555.302. 2+**

■ XIC of +TOF MS: Exp 1, 553.76 to 553.84 Da from Sample 1 (KBC\_288\_004\_PNGaseFO18\_1uL) of KBC\_288\_004\_PNGaseFO18\_1uL.wiff (Nanospray)

■ XIC of +TOF MS: Exp 1, 555.26 to 555.34 Da from Sample 1 (KBC\_288\_004\_PNGaseFO18\_1uL) of KBC\_288\_004\_PNGaseFO18\_1uL.wiff (Nanospray)

■ XIC of +TOF MS: Exp 1, 553.76 to 553.84 Da from Sample 1 (KBC\_288\_004\_PNGaseFO18\_1uL) of KBC\_288\_004\_PNGaseFO18\_1... Max. 9620.2 cps.

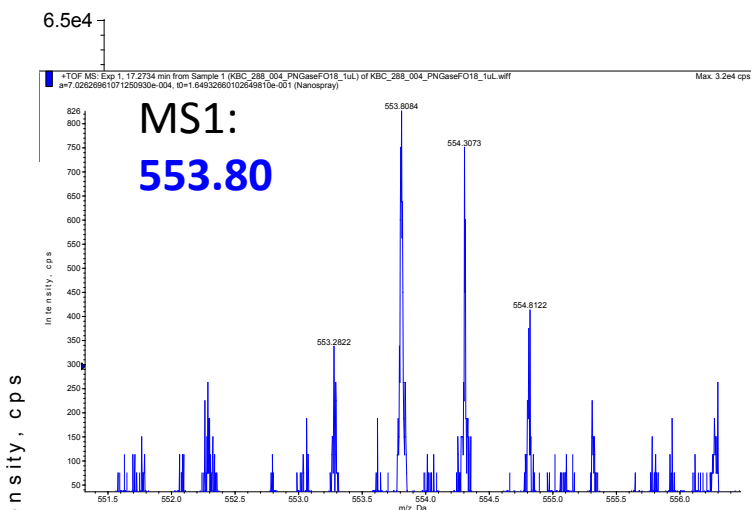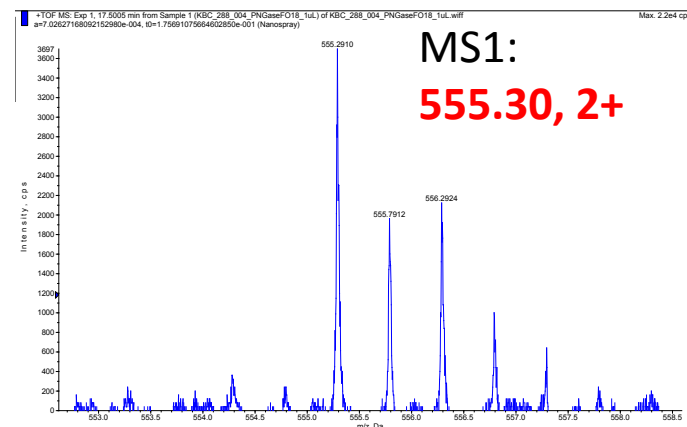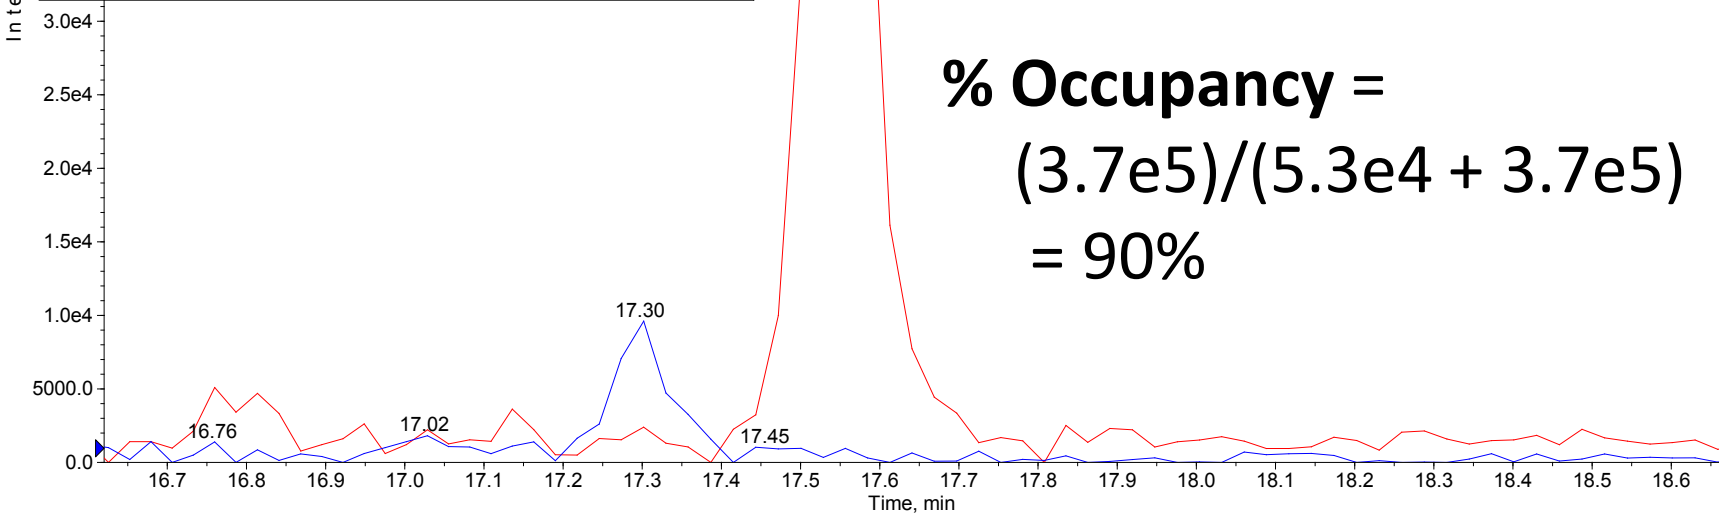

$$\begin{aligned} \% \text{ Occupancy} &= \\ &= (3.7e5) / (5.3e4 + 3.7e5) \\ &= 90\% \end{aligned}$$

## HEK ITIH4 + Trypsin + GluC

| Conf | Sequence           | Modifications               | Prec MW | Prec m/z | Theor MW | Theor m/z | Theor z | Time  |
|------|--------------------|-----------------------------|---------|----------|----------|-----------|---------|-------|
| 99.0 | LPTQNITFQTE        | Delta:H(1)O(-1)18O(1)(N)@5  | 1293.63 | 647.82   | 1293.66  | 647.84    | 2       | 15.93 |
| 99.0 | STFMTNQLVDALTTWQNK | Delta:H(1)O(-1)18O(1)(N)@17 | 2100.01 | 701.01   | 2100.03  | 701.02    | 3       | 19.32 |
| 45.6 | NQALNLSLAY         | Delta:H(1)O(-1)18O(1)(N)@5  | 1108.57 | 555.29   | 1108.59  | 555.30    | 2       | 17.60 |
| 0.5  | KAFITNF            | Delta:H(1)O(-1)18O(1)(N)@6  | 842.44  | 422.23   | 842.47   | 422.24    | 2       | 16.30 |

## HEK ITIH4 + Trypsin + ChymoT

| Conf | Sequence              | Modifications               | Prec MW | Prec m/z | Theor MW | Theor m/z | Theor z | Time  |
|------|-----------------------|-----------------------------|---------|----------|----------|-----------|---------|-------|
| 99.0 | LPTQNITFQTESSVAEQEAEF | Delta:H(1)O(-1)18O(1)(N)@5  | 2371.10 | 791.37   | 2371.12  | 791.38    | 3       | 17.52 |
| 99.0 | MTNQLVDALTTWQNK       | Delta:H(1)O(-1)18O(1)(N)@14 | 1764.86 | 883.44   | 1764.88  | 883.45    | 2       | 17.97 |
| 99.0 | NQALNLSLAY            | Delta:H(1)O(-1)18O(1)(N)@5  | 1108.57 | 555.29   | 1108.59  | 555.30    | 2       | 17.54 |
| 98.9 | RNQALNLSLAY           | Delta:H(1)O(-1)18O(1)(N)@6  | 1264.67 | 633.34   | 1264.69  | 633.35    | 2       | 16.36 |



# Supplementary Figure 4

Serum-Derived ITIH4 Glycopeptides (Desialylated) with ETD Fragmentation

IPKPEASFSPR + 2mTRAQ + Hex-HexNAc

L AILPASAPPATSNPDPAVSR + mTRAQ + Hex2HexNAc2

RT: 49.0331 - 54.3016

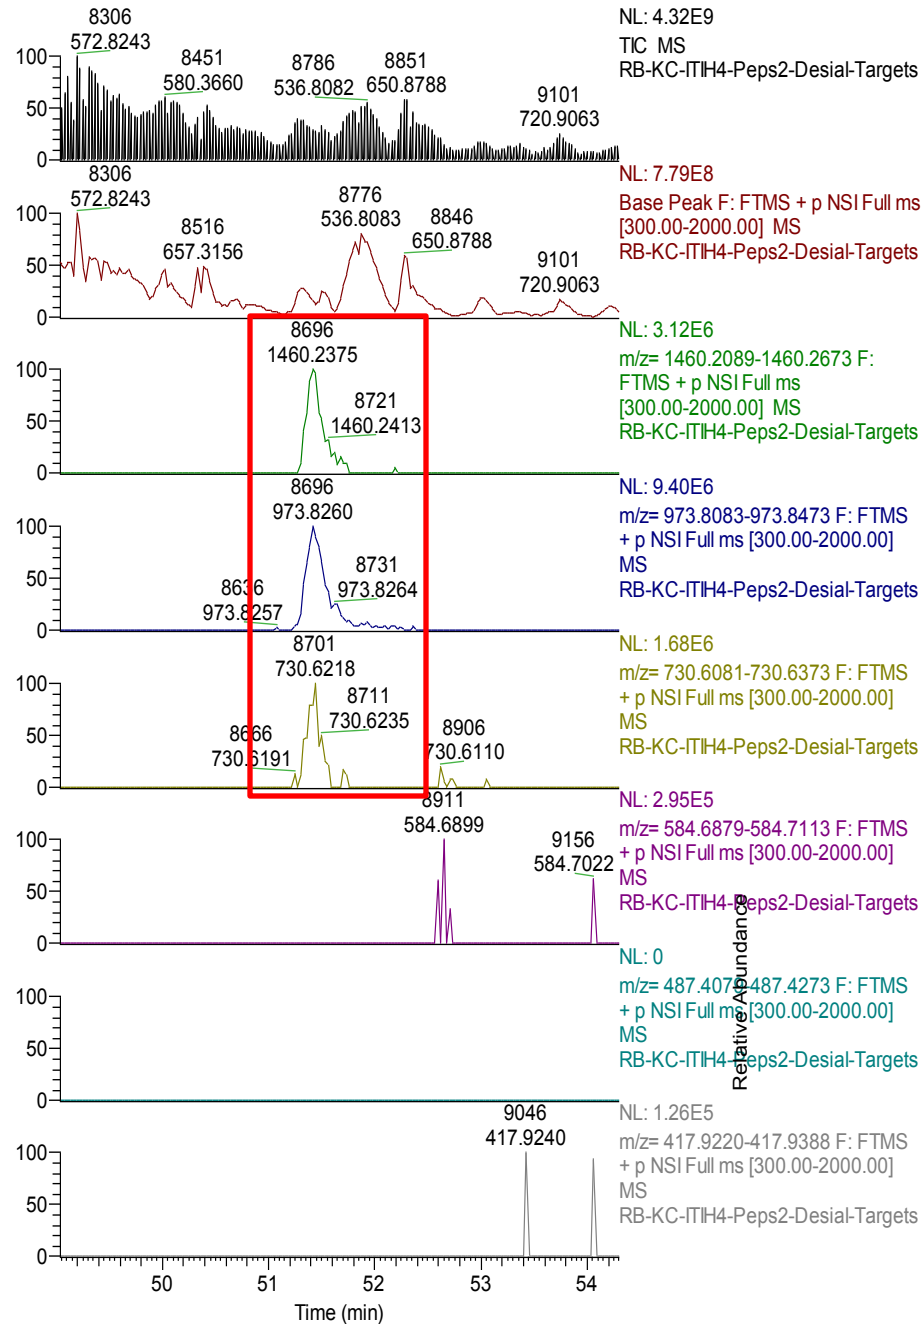

RB-KC-ITI4-Peps2-Desial-Targets #8679-8711 RT: 51.33-51.50 AV: 7 NL: 1.78E7

F: FTMS + p NSI Full ms [300.00-2000.00]

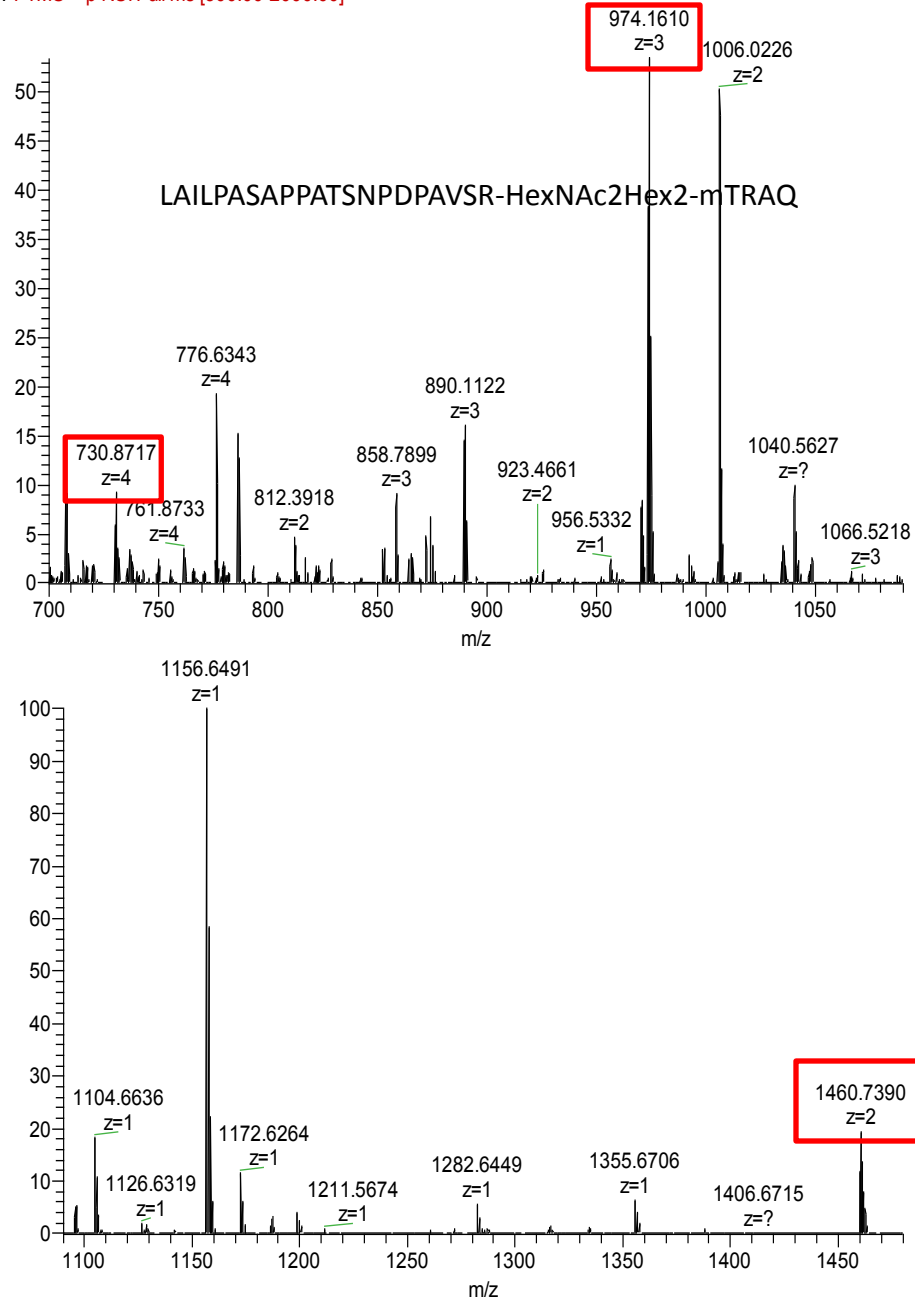

RT: 50.7869 - 51.9298

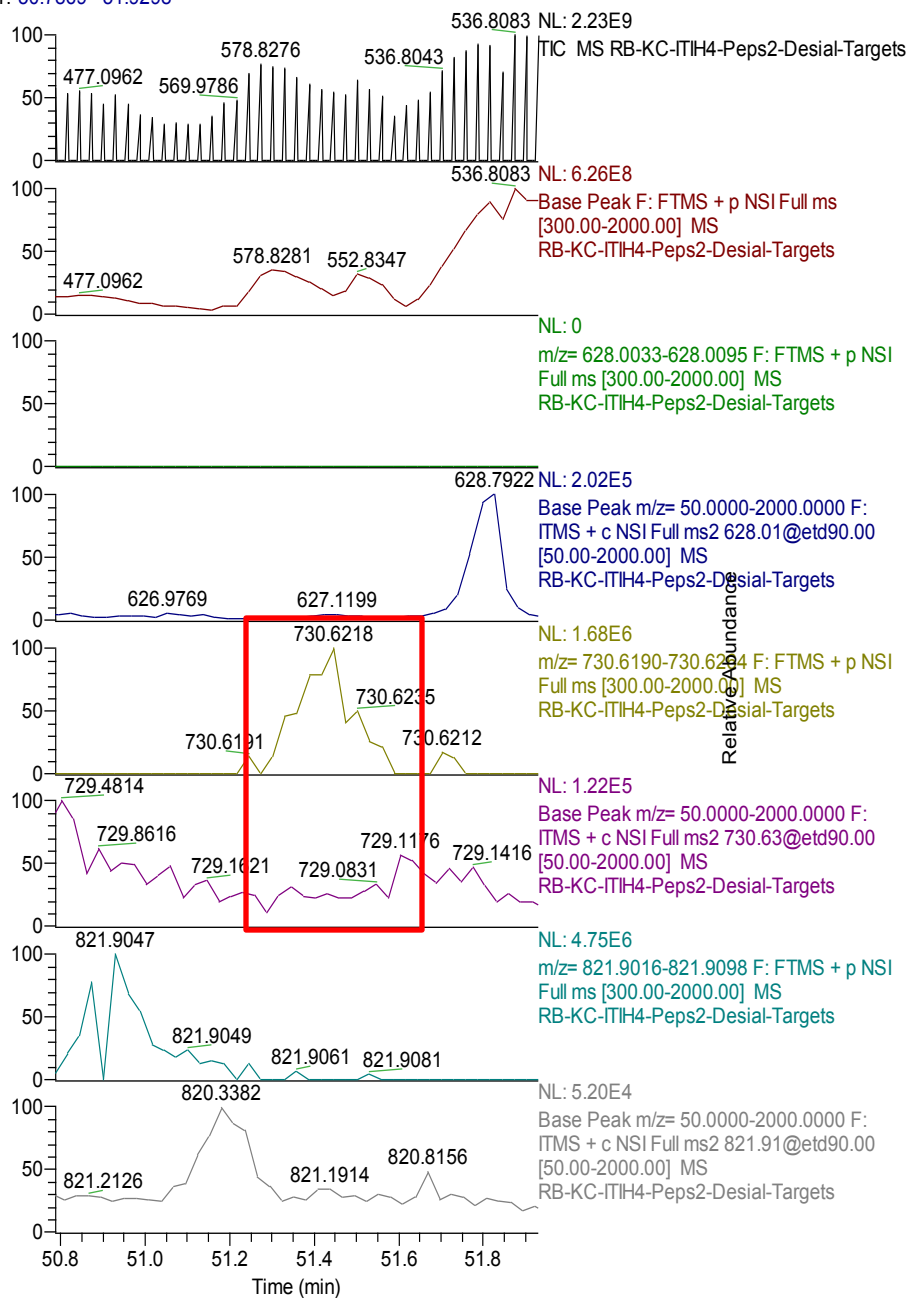

RB-KC-ITI4-Peps2-Desial-Targets #8685-8719 RT: 51.37-51.55 AV: 7 NL: 5.91E3

F: ITMS + c NSI Full ms 2 730.63@etd90.00 [50.00-2000.00]

## LAILPASAPPATSNPDPVSR-HexNAc2Hex2-mTRAQ

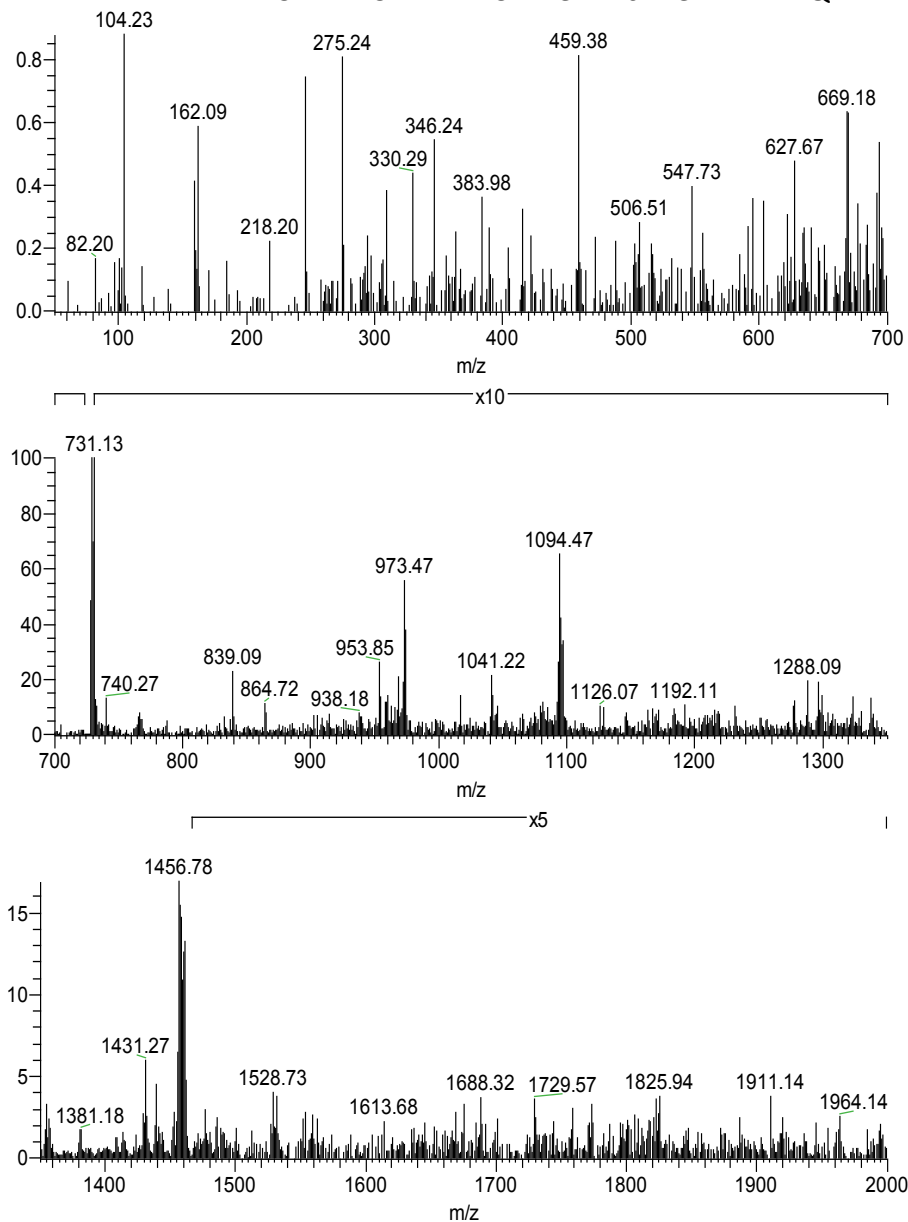

◦: No modification  
 \*: Modified by HexNAcHex  
 \*\*: Modified by 2HexNAcHex

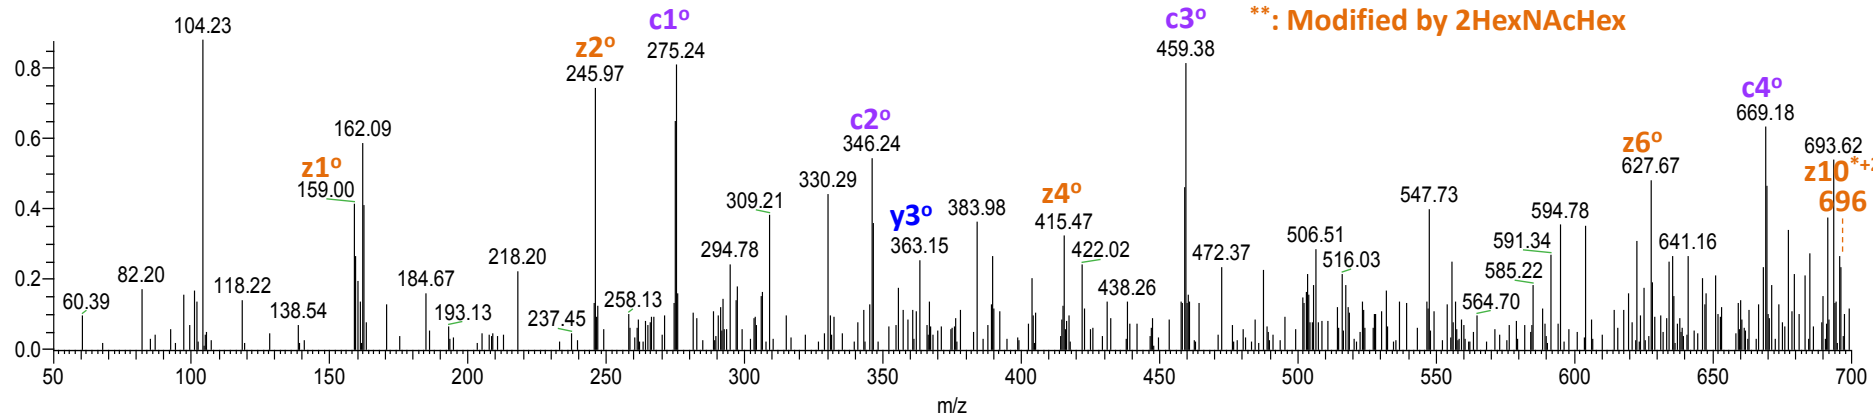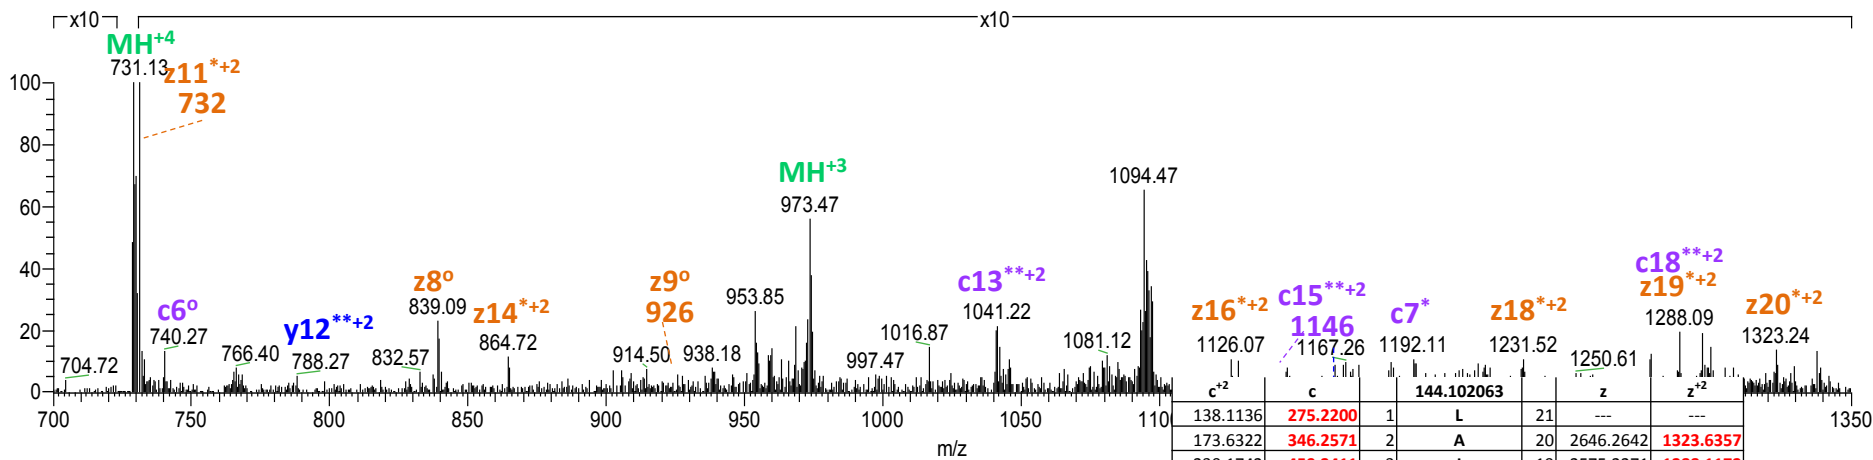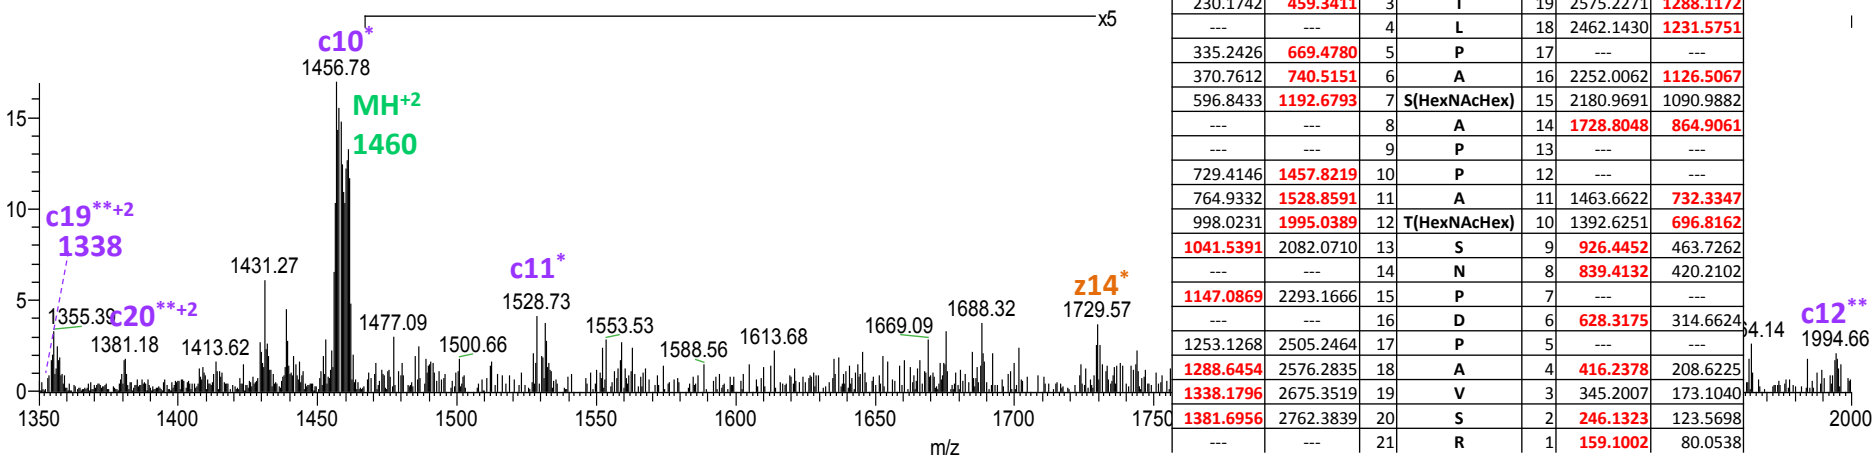

| $c^{+2}$  | $c$       | $z$ | $z^{+2}$     |    |           |           |
|-----------|-----------|-----|--------------|----|-----------|-----------|
| 138.1136  | 275.2200  | 1   | L            | 21 | ---       | ---       |
| 173.6322  | 346.2571  | 2   | A            | 20 | 2646.2642 | 1323.6357 |
| 230.1742  | 459.3411  | 3   | I            | 19 | 2575.2271 | 1288.1172 |
| ---       | ---       | 4   | L            | 18 | 2462.1430 | 1231.5751 |
| 335.2426  | 669.4780  | 5   | P            | 17 | ---       | ---       |
| 370.7612  | 740.5151  | 6   | A            | 16 | 2252.0062 | 1126.5067 |
| 596.8433  | 1192.6793 | 7   | S(HexNAcHex) | 15 | 2180.9691 | 1090.9882 |
| ---       | ---       | 8   | A            | 14 | 1728.8048 | 864.9061  |
| ---       | ---       | 9   | P            | 13 | ---       | ---       |
| 729.4146  | 1457.8219 | 10  | P            | 12 | ---       | ---       |
| 764.9332  | 1528.8591 | 11  | A            | 11 | 1463.6622 | 732.3347  |
| 998.0231  | 1995.0389 | 12  | T(HexNAcHex) | 10 | 1392.6251 | 696.8162  |
| 1041.5391 | 2082.0710 | 13  | S            | 9  | 926.4452  | 463.7262  |
| ---       | ---       | 14  | N            | 8  | 839.4132  | 420.2102  |
| 1147.0869 | 2293.1666 | 15  | P            | 7  | ---       | ---       |
| ---       | ---       | 16  | D            | 6  | 628.3175  | 314.6624  |
| 1253.1268 | 2505.2464 | 17  | P            | 5  | ---       | ---       |
| 1288.6454 | 2576.2835 | 18  | A            | 4  | 416.2378  | 208.6225  |
| 1338.1796 | 2675.3519 | 19  | V            | 3  | 345.2007  | 173.1040  |
| 1381.6956 | 2762.3839 | 20  | S            | 2  | 246.1323  | 123.5698  |
| ---       | ---       | 21  | R            | 1  | 159.1002  | 80.0538   |

RT: 41.6020 - 47.9842

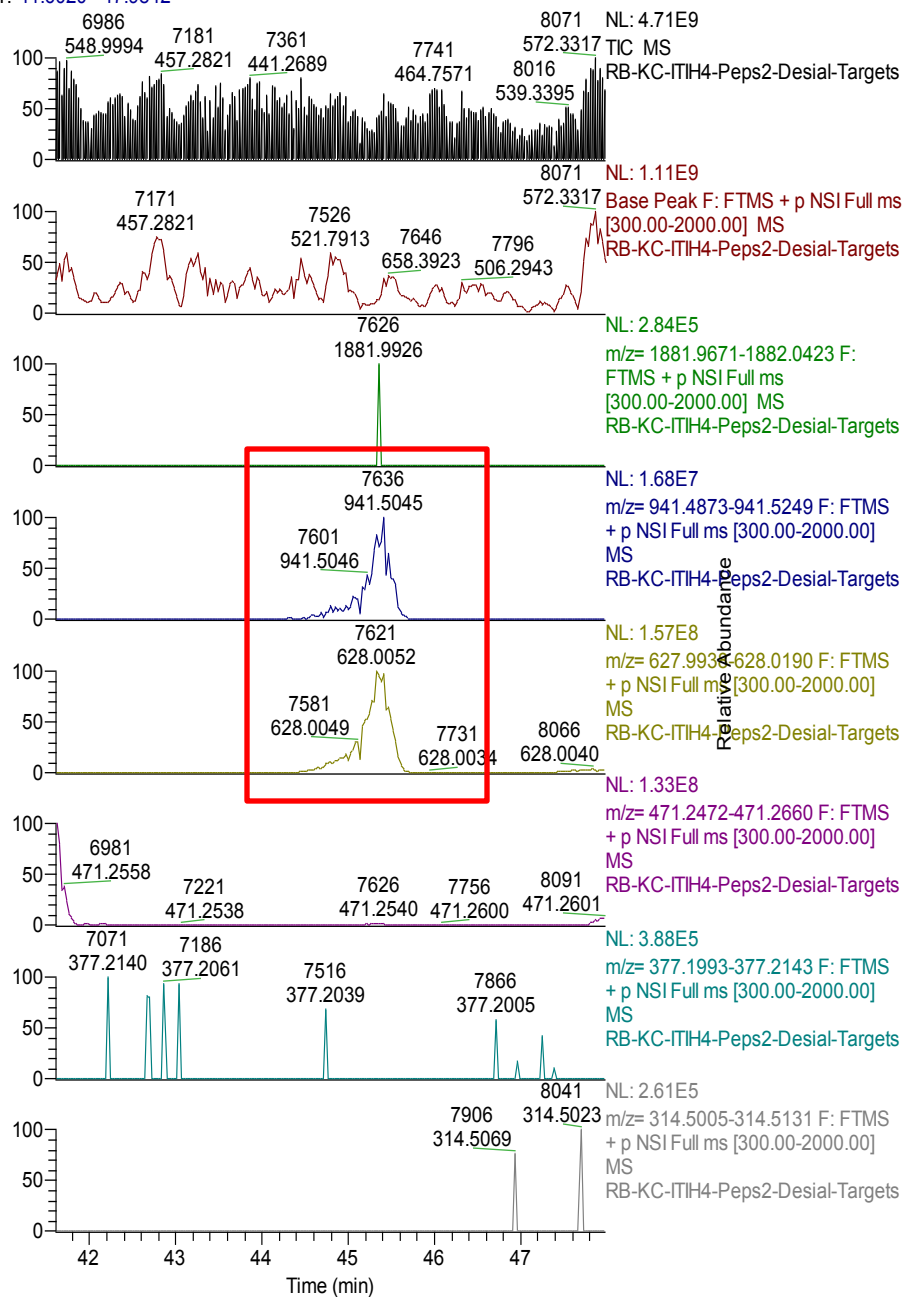

RB-KC-ITI4-Peps2-Desial-Targets #7613-7639 RT: 45.30-45.41 AV: 5 NL: 1.73E8

F: FTMS + p NSI Full ms [300.00-2000.00]

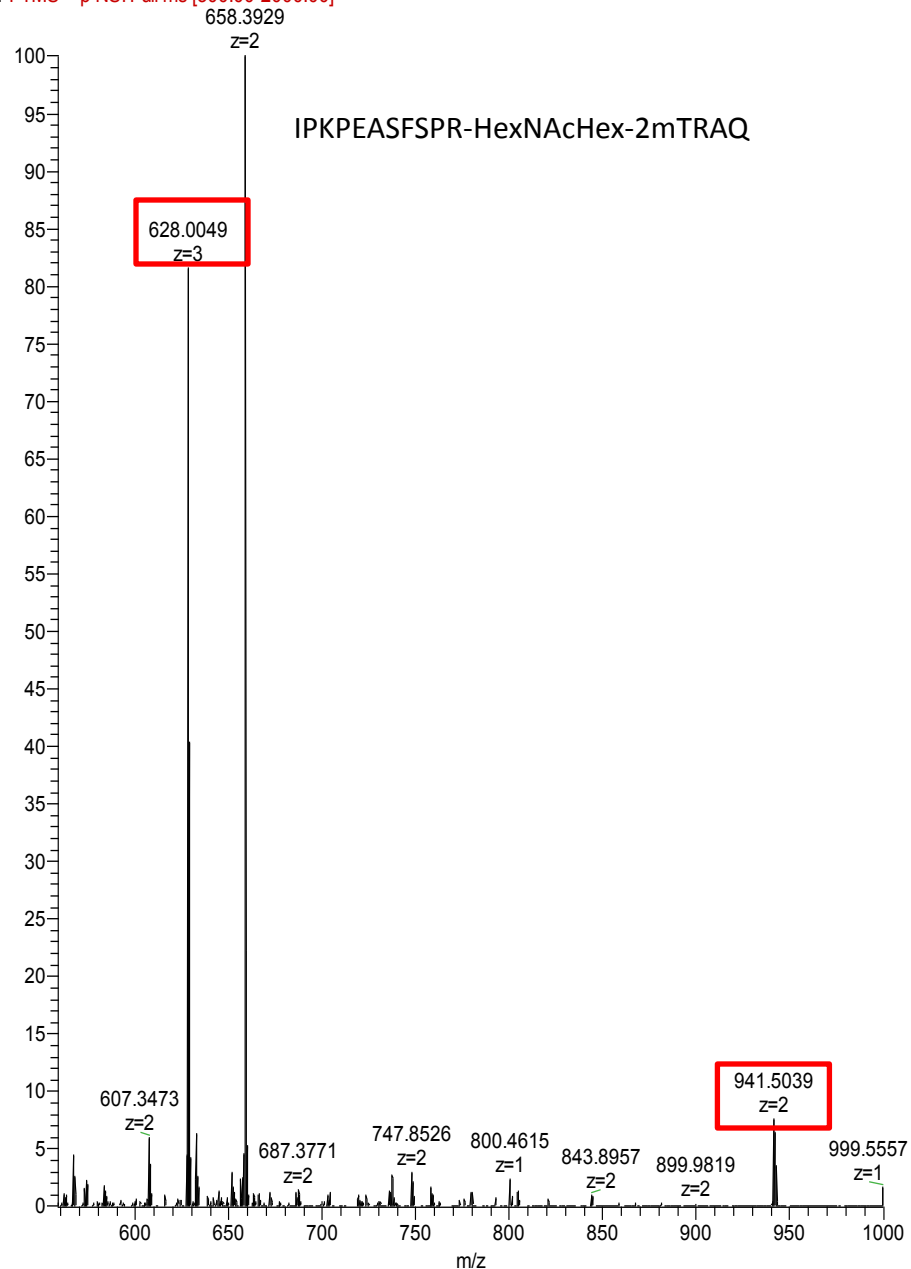

RT: 42.0663 - 47.7518

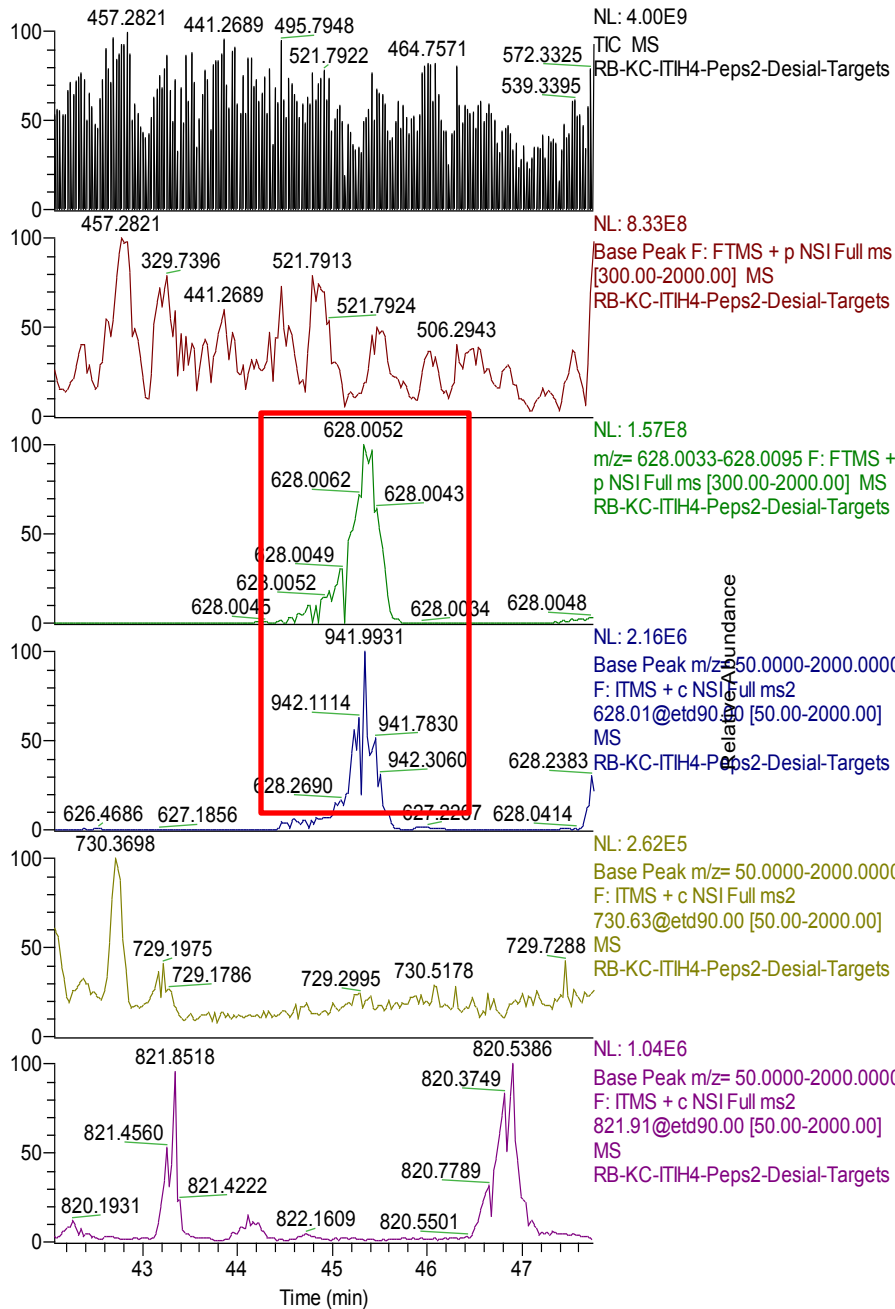

RB-KC-ITI4-Peps2-Desial-Targets #7595-7649 RT: 45.20-45.48 AV: 11 NL: 1.96E5

F: ITMS + c NSI Full ms2 628.01@etd90.00 [50.00-2000.00]

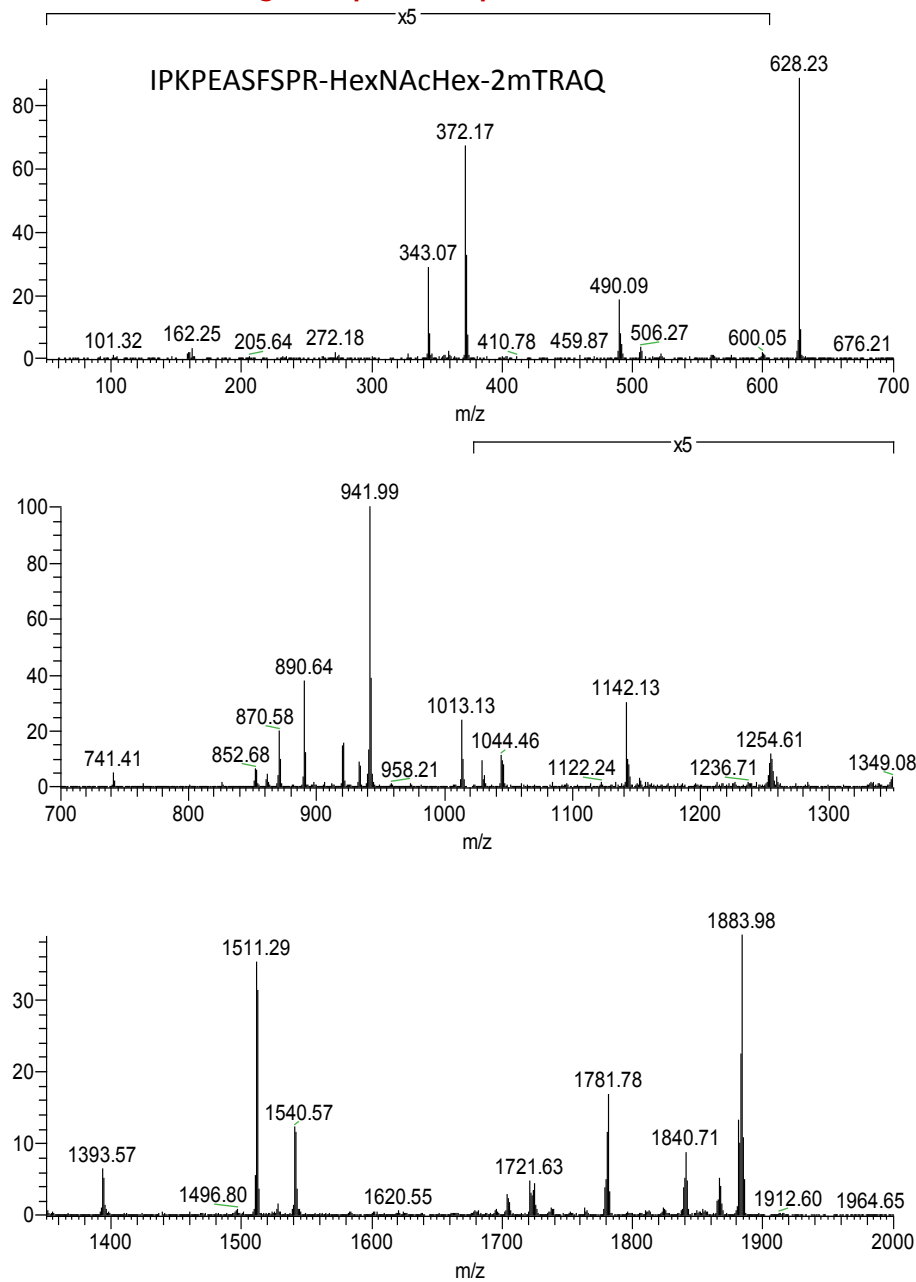

RB-KC-ITIH4  
F: ITMS + c.N

| c         |    | 144.102063    | y  | z                   |
|-----------|----|---------------|----|---------------------|
| ---       | 1  | I             | 11 | ---                 |
| 372.2727  | 2  | P             | 10 | 1624.8186           |
| ---       | 3  | K(144.102063) | 9  | 1527.7659 1511.7472 |
| 741.5225  | 4  | P             | 8  | 1255.5689           |
| 870.5651  | 5  | E             | 7  | 1158.5161 1142.4974 |
| 941.6022  | 6  | A             | 6  | 1029.4735 1013.4548 |
| 1393.7664 | 7  | S(HexNAcHex)  | 5  | 958.4364 942.4177   |
| 1540.8349 | 8  | F             | 4  | 506.2722 490.2534   |
| ---       | 9  | S             | 3  | 359.2037 343.1850   |
| 1724.9196 | 10 | P             | 2  | 272.1717            |
| ---       | 11 | R             | 1  | 175.1190 159.1002   |

NL: 1.96E5

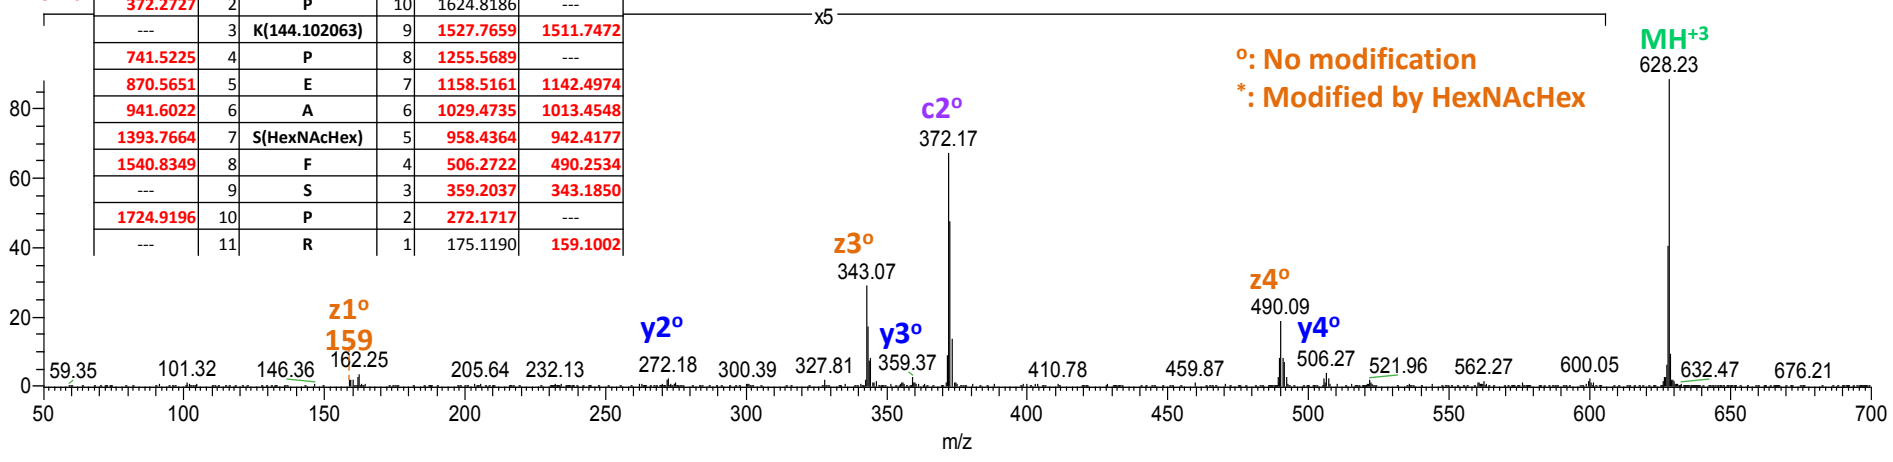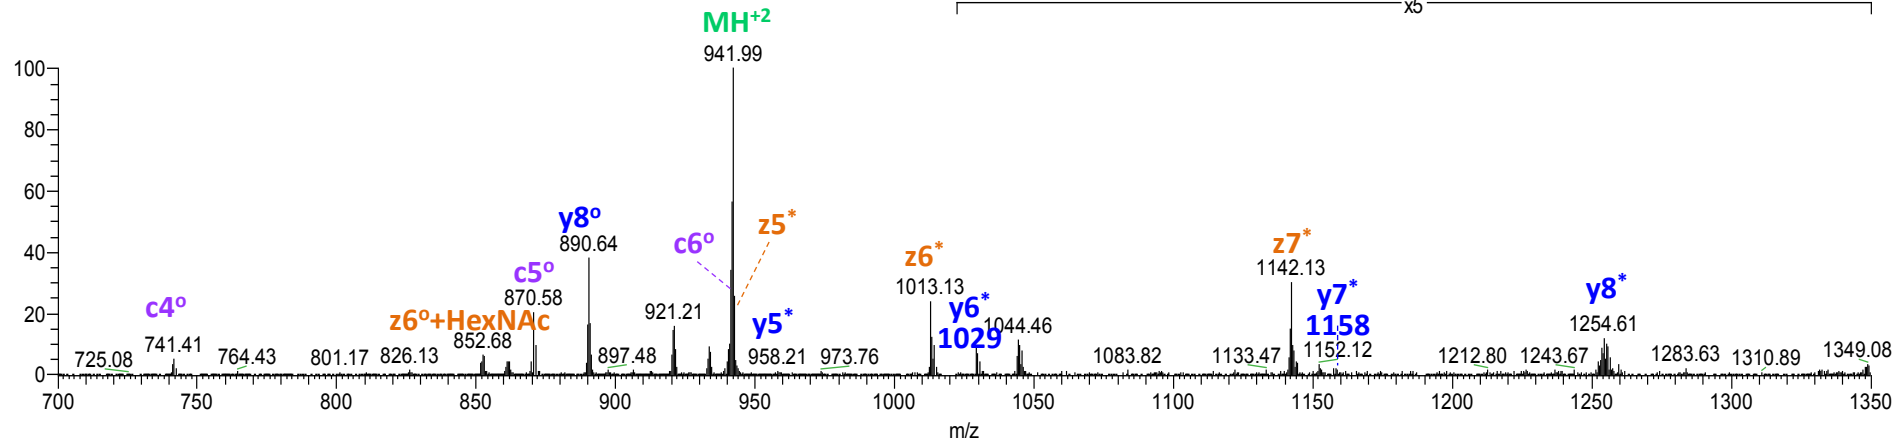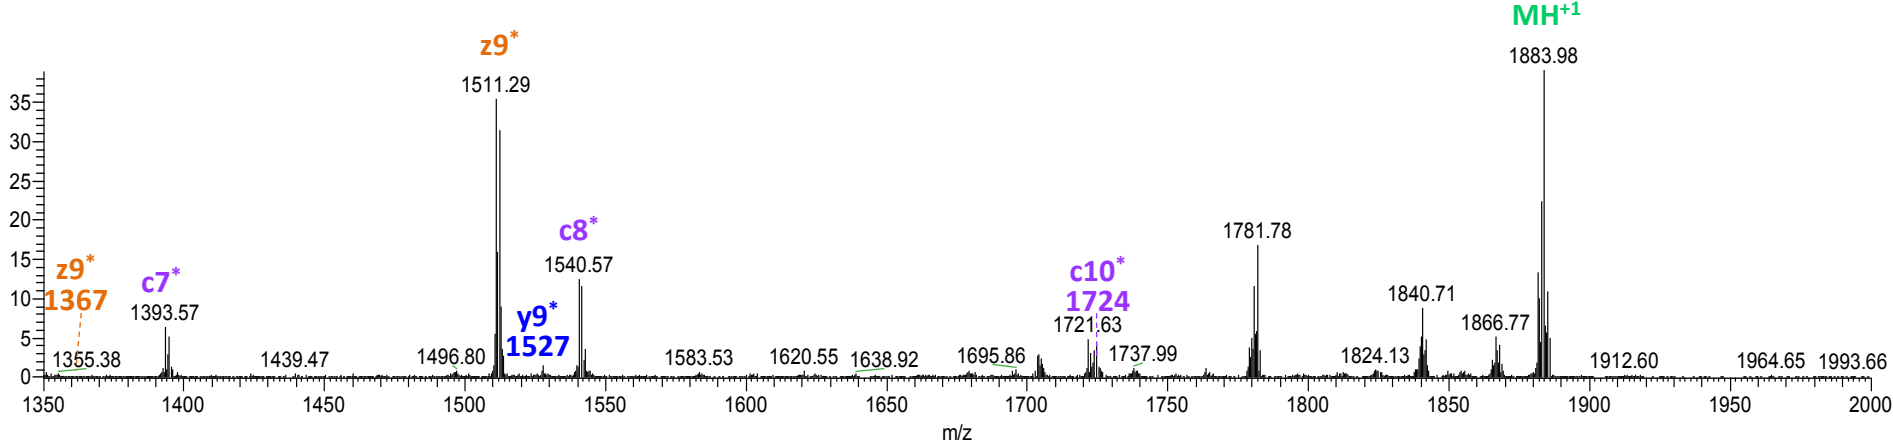

# Supplementary Figure 5

Table of all observed recombinant and serum-derived ITIH4 glycopeptides from CID MS/MS spectra, including (a) no exoglycosidase treatment, (b) after treatment with 2/3,6,8 neuraminidase, or (c) after treatment with 2/3,6,8 neuraminidase and alpha 1-3,4 fucosidase.



**Cell ITIH4 + Neuraminidase****AFITNFS (N81)**

| <b>Oxford</b> | <b>m/z (charge)</b> | <b>%</b> |
|---------------|---------------------|----------|
| M5            | 964.90 (2+)         | 3        |
| M6            | 1045.93 (2+)        | 2        |
| A2            | 670.96 (3+)         | 1        |
|               | 711.29 (3+)         | 5        |
| A2G1          | 724.97 (3+)         | 2        |
|               | 765.31 (3+)         | 4        |
| A2G2          | 778.99 (3+)         | 64       |
| A3G1          | 792.68 (3+)         | 3        |
| FA2G2         | 827.67 (3+)         | 5        |
| FA3G1         | 841.35 (3+)         | 4        |
| A3G2          | 846.69 (3+)         | 3        |
| A3G3          | 900.70 (3+)         | 4        |

**ALTTWQNK (N207)**

| <b>Oxford</b> | <b>m/z (charge)</b> | <b>%</b> |
|---------------|---------------------|----------|
| FA2           | 802.69 (3+)         | 2        |
| FA2G1         | 856.70 (3+)         | 3        |
| FA2G2         | 910.72 (3+)         | 40       |
| FA3G1         | 924.4 (3+)          | 23       |
|               | 951.03 (3+)         | 8        |
| FA2F1G2       | 959.41 (3+)         | 3        |
| FA3F1G1       | 973.08 (3+)         | 16       |
| FA3G2         | 978.42 (3+)         | 4        |
|               | 986.76 (3+)         | 1        |

**NVVFVIDK (N274)**

| <b>Oxford</b> | <b>m/z (charge)</b> | <b>%</b> |
|---------------|---------------------|----------|
| M5            | 717.33 (3+)         | 15       |
| M6            | 771.34 (3+)         | 62       |
| M7            | 825.36 (3+)         | 14       |
| M8            | 879.38 (3+)         | 9        |

**LPTQNITFQTE (N517)**

| <b>Oxford</b> | <b>m/z (charge)</b> | <b>%</b> |
|---------------|---------------------|----------|
| FA2           | 912.73 (3+)         | 3        |
| FA2G1         | 966.75 (3+)         | 3        |
| FA3           | 980.43 (3+)         | <1       |
| FA2G2         | 1020.77 (3+)        | 40       |
| FA2F1G2       | 1069.46 (3+)        | 2        |
| FA3G1         | 776.09 (4+)         | 3        |
| FA3G1         | 1034.43 (3+)        | 9        |
| FA3F1G1       | 1083.13 (3+)        | 4        |
| FA3G2         | 1088.46 (3+)        | 4        |
| FA3F1G2       | 1137.15 (3+)        | <1       |
| FA3G3         | 857.11 (4+)         | 17       |
| FA3F1G3       | 1191.17 (3+)        | <1       |
| FA4G2         | 867.37 (4+)         | 3        |
| FA4G4         | 948.40 (4+)         | 12       |

**NQALNLSLAY (N577)**

| <b>Oxford</b> | <b>m/z (charge)</b> | <b>%</b> |
|---------------|---------------------|----------|
| FA2           | 851.04 (3+)         | 3        |
| FA2G1         | 905.06 (3+)         | 3        |
| FA2G2         | 959.07 (3+)         | 44       |
| FA3G1         | 972.73 (3+)         | 15       |
| FA3G3         | 810.85 (4+)         | 15       |
| FA4G2         | 821.10 (4+)         | 5        |
| FA4G4         | 902.13 (4+)         | 5        |
| FA4F1G4       | 938.63 (4+)         | 7        |

|                                                           |                     |          |
|-----------------------------------------------------------|---------------------|----------|
| HexNAc3Hex7Fuc1                                           | 999.41 (3+)         | 3        |
| <b>IPKPEASFSPR (S640, S642)</b>                           |                     |          |
| <b>Oxford</b>                                             | <b>m/z (charge)</b> | <b>%</b> |
| HexNAc1Hex1                                               | 531.95 (3+)         | 93       |
| HexNAc1Hex4                                               | 694.04 (3+)         | 7        |
| <b>GPDVLTATVSGK (T506, T508, S510)</b>                    |                     |          |
| <b>Oxford</b>                                             | <b>m/z (charge)</b> | <b>%</b> |
| HexNAc1Hex1                                               | 755.37 (2+)         | 6        |
| HexNAc2Hex2                                               | 625.63 (3+)         | 67       |
| HexNAc1Hex4                                               | 665.96 (3+)         | 4        |
| HexNAc1Hex1NeuAc1                                         | 600.96 (3+)         | 23       |
| <b>Cell ITIH4 + Neuraminidase<br/>+ a1-3,4 Fucosidase</b> |                     |          |
| <b>Oxford</b>                                             | <b>m/z (charge)</b> | <b>%</b> |
| M5                                                        | 964.90 (2+)         | 3        |
| M6                                                        | 1045.93 (2+)        | 2        |
| A2                                                        | 670.96 (3+)         | 1        |
|                                                           | 711.29 (3+)         | 5        |
| A2G1                                                      | 724.97 (3+)         | 3        |
|                                                           | 765.31 (3+)         | 3        |
| A2G2                                                      | 778.99 (3+)         | 66       |
| A3G1                                                      | 792.68 (3+)         | 5        |
| FA2G2                                                     | 827.67 (3+)         | 1        |
| FA3G1                                                     | 841.35 (3+)         | 3        |
| A3G2                                                      | 846.69 (3+)         | 4        |
| A3G3                                                      | 900.70 (3+)         | 4        |
| <b>ALTTWQNK (N207)</b>                                    |                     |          |
| <b>Oxford</b>                                             | <b>m/z (charge)</b> | <b>%</b> |
| A2                                                        | 754.00 (3+)         | <1       |
| FA2                                                       | 802.69 (3+)         | 2        |
| A2G1                                                      | 808.01 (3+)         | <1       |
| FA2G1                                                     | 856.70 (3+)         | 2        |
| A2G2                                                      | 862.03 (3+)         | 1        |
| FA2G2                                                     | 910.72 (3+)         | 42       |
| A3G1                                                      | 875.71 (3+)         | <1       |
| FA3G1                                                     | 924.4 (3+)          | 39       |
|                                                           | 951.03 (3+)         | 5        |
| FA2F1G2                                                   | 959.41 (3+)         | <1       |
| A3G2                                                      | 929.73 (3+)         | <1       |
| FA3G2                                                     | 978.42 (3+)         | 3        |
| HexNAc6Hex3Fuc1                                           | 938.07 (3+)         | 5        |
| <b>NVVFVIDK (N274)</b>                                    |                     |          |
| <b>Oxford</b>                                             | <b>m/z (charge)</b> | <b>%</b> |
| M5                                                        | 717.33 (3+)         | 15       |
| M6                                                        | 771.34 (3+)         | 66       |
| M7                                                        | 825.36 (3+)         | 11       |
| M8                                                        | 879.38 (3+)         | 9        |
| <b>LPTQNITFQTE (N517)</b>                                 |                     |          |
| <b>Oxford</b>                                             | <b>m/z (charge)</b> | <b>%</b> |
| A2                                                        | 864.05 (3+)         | <1       |
| FA2                                                       | 912.73 (3+)         | 3        |
| A2G1                                                      | 918.07 (3+)         | <1       |
| FA2G1                                                     | 966.75 (3+)         | 3        |
| A2G2                                                      | 972.08 (3+)         | <1       |
| FA2G2                                                     | 1020.77 (3+)        | 41       |
| FA2F1G2                                                   | 1069.46 (3+)        | <1       |
| FA3                                                       | 980.43 (3+)         | 1        |
| FA3G1                                                     | 776.09 (4+)         | 13       |

|                                               |                            |          |
|-----------------------------------------------|----------------------------|----------|
| FA3F1G1                                       | 1083.13 (3+)               | <1       |
| FA3G2                                         | 1088.46 (3+)               | 4        |
| FA3F1G2                                       | 1137.15 (3+)               | <1       |
| A3G3                                          | 1093.79 (3+)               | <1       |
| FA3G3                                         | 857.11 (4+)                | 15       |
| FA3F1G3                                       | 1191.17 (3+)               | <1       |
| A4G2                                          | 867.37 (4+)                | 3        |
| A4G4                                          | 1215.52 (3+)               | <1       |
| FA4G4                                         | 948.40 (4+)                | 14       |
| <b><i>NQAL NLSLAY (N577)</i></b>              |                            |          |
| <b>Oxford</b>                                 | <b><i>m/z (charge)</i></b> | <b>%</b> |
| FA2                                           | 851.04 (3+)                | 3        |
| FA2G1                                         | 905.06 (3+)                | 3        |
| FA2G2                                         | 959.07 (3+)                | 46       |
| FA3G1                                         | 972.73 (3+)                | 10       |
| A3G3                                          | 774.34 (4+)                | 2        |
| FA3G3                                         | 810.85 (4+)                | 15       |
| A4G2                                          | 784.59 (4+)                | 1        |
| FA4G2                                         | 821.10 (4+)                | 3        |
| A4G4                                          | 853.47 (4+)                | 2        |
| FA4G4                                         | 902.13 (4+)                | 6        |
| FA4F1G4                                       | 938.63 (4+)                | 6        |
| HexNAc3Hex7Fuc1                               | 999.41 (3+)                | 3        |
| <b><i>IPKPEASFSPR (S640, S642)</i></b>        |                            |          |
| <b>Oxford</b>                                 | <b><i>m/z (charge)</i></b> | <b>%</b> |
| HexNAc1Hex1                                   | 531.95 (3+)                | 95       |
| HexNAc1Hex4                                   | 694.04 (3+)                | 5        |
| <b><i>GPDVLTATVSGK (T506, T508, S510)</i></b> |                            |          |
| <b>Oxford</b>                                 | <b><i>m/z (charge)</i></b> | <b>%</b> |
| HexNAc1Hex1                                   | 755.37 (2+)                | 4        |
| HexNAc2Hex2                                   | 625.63 (3+)                | 66       |
| HexNAc1Hex4                                   | 665.96 (3+)                | 4        |
| HexNAc1Hex1NeuAc1                             | 600.96 (3+)                | 26       |

| <b>Serum ITIH4 + Neuraminidase</b>                                           |                     |          |
|------------------------------------------------------------------------------|---------------------|----------|
| <b>KAFITNF (N81)</b>                                                         |                     |          |
| <b>Oxford</b>                                                                | <b>m/z (charge)</b> | <b>%</b> |
| A2G2                                                                         | 821.70 (3+)         | 82       |
| A2F1G2                                                                       | 870.37 (3+)         | 7        |
| A3G3                                                                         | 943.39 (3+)         | 11       |
| <b>ALTTWQNK (N207)</b>                                                       |                     |          |
| <b>Oxford</b>                                                                | <b>m/z (charge)</b> | <b>%</b> |
| A2G2                                                                         | 862.04 (3+)         | 100      |
| <b>NVVFVIDK (N274)</b>                                                       |                     |          |
| <b>Oxford</b>                                                                | <b>m/z (charge)</b> | <b>%</b> |
| M5                                                                           | 717.32 (3+)         | 25       |
| M6                                                                           | 771.34 (3+)         | 75       |
| <b>LPTQNITFQTE (N517)</b>                                                    |                     |          |
| <b>Oxford</b>                                                                | <b>m/z (charge)</b> | <b>%</b> |
| A2G2                                                                         | 729.31 (4+)         | 64       |
|                                                                              | 972.08 (3+)         |          |
| FA2G2                                                                        | 765.82 (4+)         | 3        |
|                                                                              | 1020.77 (3+)        |          |
| A3G3                                                                         | 820.59 (4+)         | 23       |
|                                                                              | 1093.78 (3+)        |          |
| FA3G3                                                                        | 857.11 (4+)         | 9        |
|                                                                              | 1142.48 (3+)        |          |
| FA3F1G3                                                                      | 893.63 (4+)         | <1       |
|                                                                              | 1191.17 (3+)        |          |
| A4G4                                                                         | 911.89 (4+)         | <1       |
|                                                                              | 1215.52 (3+)        |          |
| <b>NQALNLSLAY (N577)</b>                                                     |                     |          |
| <b>Oxford</b>                                                                | <b>m/z (charge)</b> | <b>%</b> |
| A2G2                                                                         | 683.04 (4+)         | 84       |
|                                                                              | 910.38 (3+)         |          |
| A3G3                                                                         | 774.34 (4+)         | 16       |
|                                                                              | 1032.34 (3+)        |          |
| A3F1G3                                                                       | 1080.80 (3+)        | <1       |
| <b>Serum ITIH4 + Neuraminidase<br/>+ <math>\alpha</math>1-3,4 Fucosidase</b> |                     |          |
| <b>KAFITNF (N81)</b>                                                         |                     |          |
| <b>Oxford</b>                                                                | <b>m/z (charge)</b> | <b>%</b> |
| A2G2                                                                         | 821.70 (3+)         | 87       |
| FA2G2                                                                        | 870.37 (3+)         | 3        |
| A3G3                                                                         | 943.39 (3+)         | 10       |
| <b>ALTTWQNK (N207)</b>                                                       |                     |          |
| <b>Oxford</b>                                                                | <b>m/z (charge)</b> | <b>%</b> |
| A2G2                                                                         | 862.04 (3+)         | 100      |
| <b>NVVFVIDK (N274)</b>                                                       |                     |          |
| <b>Oxford</b>                                                                | <b>m/z (charge)</b> | <b>%</b> |
| M5                                                                           | 717.32 (3+)         | 30       |
| M6                                                                           | 771.34 (3+)         | 70       |
| <b>LPTQNITFQTE (N517)</b>                                                    |                     |          |
| <b>Oxford</b>                                                                | <b>m/z (charge)</b> | <b>%</b> |
| A2G2                                                                         | 729.31 (4+)         | 65       |
|                                                                              | 972.08 (3+)         |          |
| FA2G2                                                                        | 765.82 (4+)         | 3        |
|                                                                              | 1020.77 (3+)        |          |

|                                 |                            |          |
|---------------------------------|----------------------------|----------|
| A3G3                            | 820.59 (4+)                | 29       |
| FA3G3                           | 857.11 (4+)                | 2        |
|                                 | 1142.48 (3+)               |          |
| FA3F1G3                         | 893.63 (4+)                | <1       |
|                                 | 1191.17 (3+)               |          |
| A4G4                            | 911.89 (4+)                | 1        |
|                                 | 1215.52 (3+)               |          |
| <b><i>NQALNLSLAY (N577)</i></b> |                            |          |
| <b>Oxford</b>                   | <b><i>m/z (charge)</i></b> | <b>%</b> |
| A2G2                            | 683.04 (4+)                | 84       |
|                                 | 910.39 (3+)                |          |
| A3G3                            | 774.34 (4+)                | 16       |
|                                 | 1032.34 (3+)               |          |
